# Supplementary material for: A tendril perversion in a helical oligomer: trapping and characterizing a mobile screw-sense reversal
Source: PubMed Central journal article supplement (PMC5380885; doi:10.1039/c6sc05474a), 2017-01-25
Supplement: SC-008-C6SC05474A-s001.pdf [file SC-008-C6SC05474A-s001.pdf]

## ***A tendril perversion in a helical oligomer: trapping and characterizing a mobile screw-sense reversal***

Michael Tomsett<sup>a</sup>, Irene Maffucci<sup>b</sup>, Bryden A. F. Le Bailly<sup>a</sup>, Liam Byrne<sup>c</sup>, Stefan M. Bijvoets<sup>c</sup>, M. Giovanna Lizio<sup>c</sup>, James Raftery<sup>c</sup>, Craig P. Butts<sup>a</sup>, Simon J. Webb<sup>c</sup>, Alessandro Contini<sup>b</sup>, Jonathan Clayden<sup>a\*</sup>

<sup>a</sup>School of Chemistry, University of Bristol, Cantock's Close, Bristol BS8 1TS, UK. [j.clayden@bristol.ac.uk](mailto:j.clayden@bristol.ac.uk); <sup>b</sup>Dipartimento di Scienze Farmaceutiche □ Sezione di Chimica Generale e Organica "Alessandro Marchesini", Università degli Studi di Milano, Via Venezian, 21 20133 Milano, Italy; <sup>c</sup>School of Chemistry, University of Manchester, Oxford Road, Manchester M13 9PL, UK.

### **SUPPORTING INFORMATION**

#### **Contents:**

|                            |       |
|----------------------------|-------|
| 1. Experimental procedures | 2-37  |
| 2. NMR spectra             | 38-77 |
| 3. Computational methods   | 78-81 |
| 4. Raman spectroscopy      | 82-83 |
| 5. X-ray crystallography   | 83    |
| 6. References              | 84    |

# I. Synthetic procedures

## General Procedure A: Oxalyl chloride mediated acid chloride formation and peptide formation

To a stirred solution of acid (1 eq.) and DMF (0.1 mL) in DCM (2 mL/mmol) at 0 °C was added oxalyl chloride (1.1 eq) dropwise. The reaction mixture was allowed to return to rt and stirred for 2 h. The excess solvent and oxalyl chloride were removed *in vacuo*. A solution of amine (0.8 eq.) and Et<sub>3</sub>N (1.5 eq.) in DCM (2 mL/mmol) was added dropwise to the 2-azido-2-methylpropanoyl chloride residue at 0 °C and the reaction stirred for a further 16 h at rt. The solvent was removed *in vacuo* and the residue taken up in EtOAc (2 mL/mmol) and washed with 5% aq. KHSO<sub>4</sub> (2 mL/mmol) and sat. aq. NaHCO<sub>3</sub> (2 mL/mmol). The organic layer was dried (MgSO<sub>4</sub>), and the solvent evaporated to give the crude product.

## General Procedure B: Pd/C catalysed hydrogenation

To a stirred solution of compound (1 eq.) in MeOH (1 mL/mmol) was added Pd/C (~0.1 mg/mg) as a slurry in MeOH/DCM. The reaction was stirred under an atmosphere of H<sub>2</sub> until judged complete by TLC. The reaction mixture was then filtered through Celite® and the solvent evaporated to give the crude amine.

## General Procedure C: TFFH mediated acid fluoride formation and peptide formation

To a stirred solution of Cbz- $\alpha$ Mv-OH (2 eq.) and pyridine (2 eq.) in DCM (4 mL/mmol) was added TFFH (3 eq.) and the reaction left to stir for 4 h. The reaction mixture was washed with ice water (4 × 2 mL/mmol), dried (MgSO<sub>4</sub>) and the solvent evaporated to give Cbz- $\alpha$ Mv-F. To a stirred solution of amine (1 eq.) and DIPEA (1 eq.) in DCM (8 mL/mmol) at 0 °C was added Cbz- $\alpha$ Mv-F in DCM (1 mL/mmol) dropwise. The reaction was stirred for 5 d at rt. Once complete the solvent was removed *in vacuo* and the residue taken up in EtOAc (2 mL/mmol), washed with 5% aq. KHSO<sub>4</sub> (2 mL/mmol), sat. aq. NaHCO<sub>3</sub> (2 mL/mmol) and brine (1 mL/mmol), dried (MgSO<sub>4</sub>) and the solvent evaporated to give the crude product.

## General Procedure D: TFA deprotection of tert-butyl esters

To a stirred solution of ester (1 eq.) in DCM (3 mL/mmol) at 0 °C was added TFA (30 eq.) dropwise. Reaction was stirred until judged complete by TLC whereupon all solvent was removed *in vacuo* to give the crude product.

## General Procedure E: ICBF mediated peptide formation

To a stirred solution of acid (1 eq.) and NMM (1.05 eq.) in THF (3 mL/mmol) at -15 °C was added *i*BuCOCl (1 eq.) dropwise and the reaction stirred for 15 min. A suspension of amine (2 eq.) and NMM (2 eq.) in THF (5 mL/mmol) was added, and the reaction brought to rt and stirred for 16 h. The solvent

was removed *in vacuo* and the residue taken up in EtOAc (15 mL/mmol) and washed with 5% aq. KHSO<sub>4</sub> (15 mL/mmol), sat. aq. NaHCO<sub>3</sub> (15 mL/mmol) and brine (15 mL/mmol). The organic phase was dried (MgSO<sub>4</sub>) and the solvent evaporated to give the crude product.

### General Procedure F: Peptide coupling through azlactone formation

To a stirred solution of acid (1 eq.) and EDC.HCl (1.5 eq.) in DCM (5 mL/mmol) was added DIPEA (1.5 eq.) and the reaction stirred for 4 h. Reaction solvent was removed *in vacuo* and the residue taken up in EtOAc (5 mL/mmol). The organic layer was washed with 5% aq. KHSO<sub>4</sub> (2 × 3 mL/mmol) and brine (3 mL/mmol), dried (MgSO<sub>4</sub>) and the solvent removed *in vacuo* to give the azlactone. A solution of azlactone in MeCN (5 mL/mmol) was added to amine (1 eq.) and the reaction stirred at reflux for at least 5 d. The reaction mixture was then allowed to cool, the solvent removed *in vacuo* and the residue taken up in EtOAc (10 mL/mmol). The organic layer was washed with 5% aq. KHSO<sub>4</sub> (10 mL/mmol), sat. aq. NaHCO<sub>3</sub> (10 mL/mmol) and brine (5 mL/mmol), dried (MgSO<sub>4</sub>) and the solvent evaporated to give the crude product.

### Cbz-L/D- $\alpha$ Mv-OH – **SI**

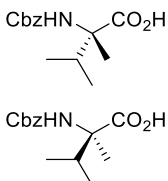
 To a stirred solution of H-/D- $\alpha$ Mv-OH (1.00 g, 7.63 mmol) in acetone (17.5 mL) and 2 M aq. NaOH (17.5 mL) at 0 °C was added benzyl chloroformate (0.65 mL, 4.58 mmol) in acetone (2 mL) dropwise over 30 min. The reaction was stirred for 6 h before benzyl chloroformate was added again in the same manner. The pH was adjusted to 13 with 2 M aq. NaOH and left to stir overnight. The acetone was removed *in vacuo* and the aqueous diluted with 2 M aq. NaOH (10 mL). This was washed with Et<sub>2</sub>O (3 × 20 mL), and then acidified to pH 2 with conc. HCl. The aqueous was then extracted with EtOAc (3 × 30 mL), and the organic washed with brine (30 mL), dried (MgSO<sub>4</sub>) and evaporated to give **SI** as a thick oil which crystallises over time (1.24 g, 4.67 mmol, 61%).  $\delta_{\text{H}}$  (500 MHz, CDCl<sub>3</sub>) 7.31-7.21 (5H, m, ArH), 5.29 (1H, s, br, NH), 4.14 (1H, d, *J* = 7.2, PhCH<sub>2</sub>), 4.11 (1H, d, *J* = 7.2, PhCH<sub>2</sub>), 2.30-2.14 (1H, m, CH(CH<sub>3</sub>)<sub>2</sub>), 1.50 (3H, s, NHC(CH<sub>3</sub>)), 0.92 (3H, d, *J* = 6.9, CH(CH<sub>3</sub>)<sub>2</sub>), 0.89 (3H, d, *J* = 6.9, CH(CH<sub>3</sub>)<sub>2</sub>);  $\delta_{\text{C}}$  (125 MHz, CDCl<sub>3</sub>) 178.4 (CO<sub>2</sub>H), 155.6 (CONH), 136.2, 128.6, 128.2, 128.1 (Ar), 66.9 (NHC(CH<sub>3</sub>)), 63.0 (PhCH<sub>2</sub>), 34.7 (CH(CH<sub>3</sub>)<sub>2</sub>), 18.8 (NHC(CH<sub>3</sub>)), 17.3 (CH(CH<sub>3</sub>)<sub>2</sub>), 17.1 (CH(CH<sub>3</sub>)<sub>2</sub>); (L)  $[\alpha]_{\text{D}}^{20} = +16.0$  (c 0.33, CH<sub>3</sub>OH), (D)  $[\alpha]_{\text{D}}^{20} = -16.2$  (c 1.00; CH<sub>3</sub>OH) (Lit = ± 16.3, c 0.80). Data are in accordance with literature values.<sup>1</sup>

### Cbz-L/D- $\alpha$ Mv-NHMe – S2

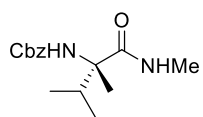

According to the procedure of Toniolo:<sup>2</sup> To a stirred solution of **S1** (1.23 g, 4.64 mmol), HOBt (1.03 g, 6.96 mmol) and DIPEA (1.20 mL, 6.95 mmol) in DCM (15 mL) was added EDC.HCl (133 g, 6.96 mmol) and left to stir for 1 h. MeNH<sub>2</sub>.HCl (938 mg, 13.9 mmol) was added with DIPEA (3.25 mL, 13.9 mmol) and the reaction was stirred for 16 h. When complete the reaction mixture was taken up in EtOAc (60 mL), and washed with 5% aq. KHSO<sub>4</sub> (40 mL), sat. aq. NaHCO<sub>3</sub> (40 mL) and brine (20 mL). The organic layer was dried (MgSO<sub>4</sub>) and the solvent evaporated to give the crude product. This was purified by flash column chromatography (1:1 PE:EtOAc increasing to 1:4) to give pure **S2** as a clear oil (993 mg, 3.57 mmol, 77%).  $\delta_H$  (500 MHz, CDCl<sub>3</sub>) 7.23-7.14 (5H, m, ArH), 6.82 (1H, s, br, NH), 5.69 (1H, s, NH), 4.97 (1H, d,  $J = 12.3$ , PhCH<sub>2</sub>), 4.91 (1H, d,  $J = 12.3$ , PhCH<sub>2</sub>), 2.62 (3H, s, NHCH<sub>3</sub>), 2.26-2.08 (1H, m, CH(CH<sub>3</sub>)<sub>2</sub>), 1.37 (3H, s, NHC(CH<sub>3</sub>)<sub>3</sub>), 0.79 (3H, d,  $J = 6.9$ , CH(CH<sub>3</sub>)<sub>2</sub>), 0.77 (3H, d,  $J = 6.9$ , CH(CH<sub>3</sub>)<sub>2</sub>);  $\delta_C$  (125 MHz, CDCl<sub>3</sub>) 174.3 (CONHCH<sub>3</sub>), 155.5 (CONHCH<sub>2</sub>), 136.2, 128.5, 128.1, 128.0 (Ar), 66.6 (NHC(CH<sub>3</sub>)<sub>3</sub>), 63.2 (PhCH<sub>2</sub>), 34.5 (CH(CH<sub>3</sub>)<sub>2</sub>), 26.5 (NHCH<sub>3</sub>), 18.0 (NHC(CH<sub>3</sub>)<sub>3</sub>), 17.1 (CH(CH<sub>3</sub>)<sub>2</sub>), 17.0 (CH(CH<sub>3</sub>)<sub>2</sub>); (L)  $[\alpha]_D^{20} = +6.4$  (c 0.50; CH<sub>3</sub>OH), (D)  $[\alpha]_D^{20} = -6.4$  (c 1.00; CH<sub>3</sub>OH) (Lit =  $\pm 0.6$ , c 0.50). Data are in accordance with literature values.

### H-L/D- $\alpha$ Mv-NHMe – S3

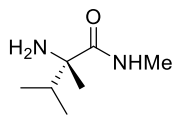

From **S2** (1.18 g, 3.96 mmol) according to **General Procedure B**. **S3** obtained as white powder (553 mg, 3.84 mmol, 97%).  $R_f$  0.24 (EtOAc); **m.p.** >235 °C (decomp);  $\delta_H$  (500 MHz, CD<sub>3</sub>OD), 4.85 (2H, s, br, NH<sub>2</sub>), 2.74 (3H, s, NHCH<sub>3</sub>), 2.03 (1H, sep,  $J = 6.9$ , CH(CH<sub>3</sub>)<sub>2</sub>), 1.29 (3H, s, NHC(CH<sub>3</sub>)<sub>3</sub>), 0.90 (3H, d,  $J = 6.9$ , CH(CH<sub>3</sub>)<sub>2</sub>), 0.81 (3H, d,  $J = 6.9$ , CH(CH<sub>3</sub>)<sub>2</sub>);  $\delta_C$  (125 MHz, CD<sub>3</sub>OD) 180.6 (CONHCH<sub>3</sub>), 61.4 (NHC(CH<sub>3</sub>)<sub>3</sub>), 36.4 (CH(CH<sub>3</sub>)<sub>2</sub>), 26.3 (NHCH<sub>3</sub>), 24.8 (NHC(CH<sub>3</sub>)<sub>3</sub>), 17.7 (CH(CH<sub>3</sub>)<sub>2</sub>), 16.4 (CH(CH<sub>3</sub>)<sub>2</sub>);  $\nu_{max}/cm^{-1}$  3264m.br (N-H), 2971m (C-H), 1661s (C=O), 1554m (C-N), 1515m (C-N); (L)  $[\alpha]_D^{20} = -24.0$  (c 1.04, CH<sub>3</sub>OH), (D)  $[\alpha]_D^{20} = +24.0$  (c 1.07, CH<sub>3</sub>OH).

### Cbz-L/D- $\alpha$ Mv<sub>2</sub>-NHMe – S4

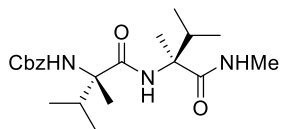

From **S1** (1.86 g, 7.68 mmol), TFFH (3.04 g, 11.5 mmol), pyridine (0.56 mL, 7.68 mmol), **S3** (553 mg, 3.84 mmol) and DIPEA (0.67 mL, 3.84 mmol) according to **General Procedure C**. Crude **S4** was purified by flash column chromatography (99:1 DCM:MeOH increasing to 19:1) to give the pure product (412 mg, 1.05 mmol, 27%).  $R_f$  0.20 (1:1 PE:EtOAc); **m.p.** 105-108 °C;  $\delta_H$  (500 MHz, CDCl<sub>3</sub>) 7.36-7.30 (5H, m, ArH), 7.24 (1H, s, br, CONH), 6.22 (1H, s, br, CONH), 5.21 (1H, s, PhCH<sub>2</sub>), 5.19 (1H, s, PhCH<sub>2</sub>), 3.85 (1H, s, br, CONH), 2.77 (3H, d,  $J = 4.5$ ,

NHCH<sub>3</sub>), 1.97-1.87 (2H, m, CH(CH<sub>3</sub>)<sub>2</sub>), 1.53 (3H, s, NHC(CH<sub>3</sub>)), 1.43 (3H, s, NHC(CH<sub>3</sub>)), 0.96 (3H, d, *J* = 6.9, CH(CH<sub>3</sub>)<sub>2</sub>), 0.93 (3H, d, *J* = 6.9, CH(CH<sub>3</sub>)<sub>2</sub>), 0.82 (3H, d, *J* = 6.9, CH(CH<sub>3</sub>)<sub>2</sub>), 0.66 (3H, d, *J* = 6.9, CH(CH<sub>3</sub>)<sub>2</sub>);  $\delta_c$  (125 MHz, CDCl<sub>3</sub>) 173.9 (CONH), 171.6 (CONH), 156.2 (CO<sub>2</sub>Bn), 135.7, 128.7, 128.7, 128.6 (Ar), 67.5 (PhCH<sub>2</sub>), 63.8 (NHCCO), 63.0 (NHCCO), 35.9 (CH(CH<sub>3</sub>)<sub>2</sub>), 35.8 (CH(CH<sub>3</sub>)<sub>2</sub>), 26.4 (NHCH<sub>3</sub>), 19.6 (NHC(CH<sub>3</sub>)), 17.8 (NHC(CH<sub>3</sub>)), 17.3 (CH(CH<sub>3</sub>)<sub>2</sub>), 17.2 (CH(CH<sub>3</sub>)<sub>2</sub>), 17.1 (CH(CH<sub>3</sub>)<sub>2</sub>), 16.6 (CH(CH<sub>3</sub>)<sub>2</sub>);  $\nu_{\max}/\text{cm}^{-1}$  3280m.br (N-H), 2965m (C-H), 1711s (C=O), 1668s (C=O), 1531m (C-N), 1497m (C-N); *m/z* (ESI<sup>+</sup>) 392.60 ([M+H]<sup>+</sup>, 100%), 414.58 ([M+Na]<sup>+</sup>, 70%), HRMS (ESI<sup>+</sup>) found [M+Na]<sup>+</sup> 414.2361 [C<sub>21</sub>H<sub>33</sub>N<sub>3</sub>O<sub>4</sub>Na]<sup>+</sup> requires 414.2369; (L)  $[\alpha]_{\text{D}}^{20}$  = +35.6 (c 0.91, CH<sub>3</sub>OH), (D)  $[\alpha]_{\text{D}}^{20}$  = -35.5 (c 1.00; CH<sub>3</sub>OH).

### H-L/D- $\alpha$ Mv<sub>2</sub>-NHMe – S5

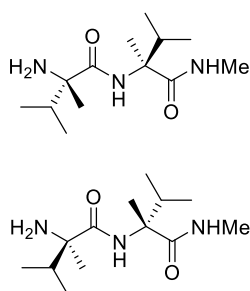

From **S4** (348 mg, 0.93 mmol) according to **General Procedure B**. **S5** was obtained as a clear oil (319 mg, *quant.*). *R<sub>f</sub>* 0.43 (19:1 DCM:MeOH);  $\delta_{\text{H}}$  (500 MHz, CD<sub>3</sub>OD) 2.76 (3H, s, *J* = 4.5, NHCH<sub>3</sub>), 2.30 (1H, sep, *J* = 6.9, CH(CH<sub>3</sub>)<sub>2</sub>), 2.22 (1H, sep, *J* = 6.9, CH(CH<sub>3</sub>)<sub>2</sub>), 1.57 (3H, s, NHC(CH<sub>3</sub>)), 1.55 (3H, s, NHC(CH<sub>3</sub>)), 1.08 (3H, d, *J* = 6.9, CH(CH<sub>3</sub>)<sub>2</sub>), 1.04 (3H, d, *J* = 6.9, CH(CH<sub>3</sub>)<sub>2</sub>), 1.00 (3H, d, *J* = 6.9, CH(CH<sub>3</sub>)<sub>2</sub>), 0.92 (3H, d, *J* = 6.9, CH(CH<sub>3</sub>)<sub>2</sub>);  $\delta_c$  (125 MHz, CDCl<sub>3</sub>) 173.7 (CONH), 169.1

(CONH), 64.6 (NHCCO), 64.1 (NHCCO), 35.1 (CH(CH<sub>3</sub>)<sub>2</sub>), 34.7 (CH(CH<sub>3</sub>)<sub>2</sub>), 30.1 (NHCH<sub>3</sub>), 26.7 (NHC(CH<sub>3</sub>)), 18.6 (NHC(CH<sub>3</sub>)), 17.6 (CH(CH<sub>3</sub>)<sub>2</sub>), 17.5 (CH(CH<sub>3</sub>)<sub>2</sub>), 17.0 (CH(CH<sub>3</sub>)<sub>2</sub>), 16.9 (CH(CH<sub>3</sub>)<sub>2</sub>);  $\nu_{\max}/\text{cm}^{-1}$  3362m.br (N-H), 1658s (C=O), 1494m (C-N); (L)  $[\alpha]_{\text{D}}^{20}$  = +18.4 (c 1.00; CH<sub>3</sub>OH), (D)  $[\alpha]_{\text{D}}^{20}$  = -18.4 (c 1.01, CH<sub>3</sub>OH).

### 2-Azido-2-methylpropanoic acid – S6

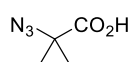

To a stirred solution of 2-bromo-2-methylpropanoic acid (15.0 g, 89.9 mmol) in DMF (80 mL) was added NaN<sub>3</sub> (8.80 g, 135 mmol). The reaction was stirred for 72 h, and then diluted with water (30 mL) and acidified to pH 2 with 1 M aq. HCl (40 mL). This was extracted with TBME (2 × 75 mL) and the organic layer washed with 1 M aq. HCl (4 × 20 mL). The organic phase was dried (MgSO<sub>4</sub>) and concentrated *in vacuo* to give **S6** as a yellow oil (9.90 g, 76.6 mmol, 85%).  $\delta_{\text{H}}$  (500 MHz, CDCl<sub>3</sub>) 11.54 (1H, s, br, CO<sub>2</sub>H), 1.52 (6H, s, C(CH<sub>3</sub>)<sub>2</sub>);  $\delta_c$  (125 MHz, CDCl<sub>3</sub>) 179.6 (CO<sub>2</sub>H), 63.0 (C(CH<sub>3</sub>)<sub>2</sub>), 24.4 (C(CH<sub>3</sub>)<sub>2</sub>). Data are in accordance with literature values.<sup>3</sup>

### N<sub>3</sub>-Aib-L/D- $\alpha$ Mv<sub>2</sub>-NHMe – S7

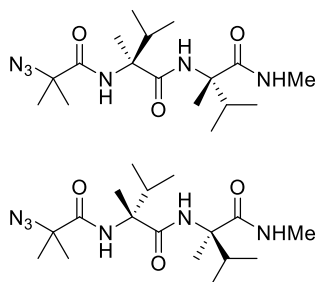

From **S6** (150 mg, 1.17 mmol), oxalyl chloride (0.10 mL, 1.28 mmol), **S5** (150 mg, 0.58 mmol) and Et<sub>3</sub>N (0.16 mL, 1.17 mmol) according to **General Procedure A**. Crude **S7** was purified by flash column chromatography (5:1 PE:EtOAc, increasing EtOAc) to the pure product as white crystals (123 mg, 0.33 mmol, 58%). **R<sub>f</sub>** 0.30 (5:1 PE:EtOAc); **m.p.** 74-76 °C; **δ<sub>H</sub>** (500 MHz, CDCl<sub>3</sub>) 7.12 (1H, s, br, NHCH<sub>3</sub>), 6.93 (1H, s, CONH), 6.16 (1H, s, CONH), 2.74 (3H, d, *J* = 4.7, NHCH<sub>3</sub>), 2.07 (1H, sep, *J* = 7.0, CH(CH<sub>3</sub>)<sub>2</sub>), 2.04 (1H, sep, *J* = 7.0, CH(CH<sub>3</sub>)<sub>2</sub>), 1.51 (3H, s, NHC(CH<sub>3</sub>)), 1.50 (3H, s, N<sub>3</sub>C(CH<sub>3</sub>)<sub>2</sub>), 1.49 (3H, s, N<sub>3</sub>C(CH<sub>3</sub>)<sub>2</sub>), 1.34 (3H, s, NHC(CH<sub>3</sub>)), 0.94 (3H, d, *J* = 7.0, CH(CH<sub>3</sub>)<sub>2</sub>), 0.90 (3H, d, *J* = 7.0, CH(CH<sub>3</sub>)<sub>2</sub>), 0.84 (3H, d, *J* = 7.0, CH(CH<sub>3</sub>)<sub>2</sub>), 0.77 (3H, d, *J* = 7.0, CH(CH<sub>3</sub>)<sub>2</sub>); **δ<sub>c</sub>** (125 MHz, CDCl<sub>3</sub>) 173.7 (CONH), 173.1 (CONH), 171.1 (CONH), 64.5 (N<sub>3</sub>C), 63.8 (NHCCO), 63.3 (NHCCO), 35.6 (CH(CH<sub>3</sub>)<sub>2</sub>), 35.3 (CH(CH<sub>3</sub>)<sub>2</sub>), 26.3 (NHCH<sub>3</sub>), 24.3 (NHC(CH<sub>3</sub>)) 17.3 (CH(CH<sub>3</sub>)<sub>2</sub>), 17.1 (CH(CH<sub>3</sub>)<sub>2</sub>); **v<sub>max</sub>/cm<sup>-1</sup>** 3337m.br (N-H), 2968m (C-H), 2113s (N<sub>3</sub>), 1683m (C=O), 1648s (C=O), 1494s (C-N) 1457m (C-N); **m/z** (ESI<sup>+</sup>) 269.4 ([M+H]<sup>+</sup>, 90%), 391.4 ([M+Na]<sup>+</sup>, 100%), HRMS (ESI<sup>+</sup>) found [M+Na]<sup>+</sup> 391.2431 [C<sub>17</sub>H<sub>32</sub>N<sub>6</sub>O<sub>3</sub>Na]<sup>+</sup> requires 391.2428; (L) [α]<sub>D</sub><sup>20</sup> = +69.7 (c 0.33, CH<sub>3</sub>OH), (D) [α]<sub>D</sub><sup>20</sup> = -69.5 (c 0.50; CH<sub>3</sub>OH).

#### H-L/D-αMv<sub>2</sub>-NHMe – S8

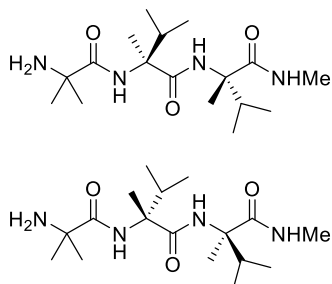

From **S7** (348 mg, 0.93 mmol) according to **General Procedure B**. **S8** was obtained as a clear oil (319 mg, *quant.*). **R<sub>f</sub>** 0.69 (19:1 DCM:MeOH); **δ<sub>H</sub>** (500 MHz, CD<sub>3</sub>OD) 2.76 (3H, s, *J* = 4.5, NHCH<sub>3</sub>), 2.30 (1H, sep, *J* = 6.9, CH(CH<sub>3</sub>)<sub>2</sub>), 2.22 (1H, sep, *J* = 6.9, CH(CH<sub>3</sub>)<sub>2</sub>), 1.57 (3H, s, NHC(CH<sub>3</sub>)), 1.55 (3H, s, NHC(CH<sub>3</sub>)), 1.08 (3H, d, *J* = 6.9, CH(CH<sub>3</sub>)<sub>2</sub>), 1.04 (3H, d, *J* = 6.9, CH(CH<sub>3</sub>)<sub>2</sub>), 1.00 (3H, d, *J* = 6.9, CH(CH<sub>3</sub>)<sub>2</sub>), 0.92 (3H, d, *J* = 6.9, CH(CH<sub>3</sub>)<sub>2</sub>); **δ<sub>c</sub>** (125 MHz, CDCl<sub>3</sub>) 173.7 (CONH), 169.1 (CONH), 64.6 (NHCCO), 64.1 (NHCCO), 35.1 (CH(CH<sub>3</sub>)<sub>2</sub>), 34.7 (CH(CH<sub>3</sub>)<sub>2</sub>), 30.1 (NHCH<sub>3</sub>), 26.7 (NHC(CH<sub>3</sub>)), 18.6 (NHC(CH<sub>3</sub>)), 17.6 (CH(CH<sub>3</sub>)<sub>2</sub>), 17.5 (CH(CH<sub>3</sub>)<sub>2</sub>), 17.0 (CH(CH<sub>3</sub>)<sub>2</sub>), 16.9 (CH(CH<sub>3</sub>)<sub>2</sub>); **v<sub>max</sub>/cm<sup>-1</sup>** 3392m.br (N-H), 2968m (C-H), 1617s (C=O), 1463m (C-N), 1403s (C-N); **m/z** (ESI<sup>+</sup>) 243.4 ([M+H]<sup>+</sup>, 100%), 365.4 ([M+Na]<sup>+</sup>, 20%), HRMS (ESI<sup>+</sup>) found [M+Na]<sup>+</sup> 365.2528 [C<sub>17</sub>H<sub>34</sub>N<sub>4</sub>O<sub>3</sub>Na]<sup>+</sup> requires 365.2529; (L) [α]<sub>D</sub><sup>20</sup> = +18.4 (c 1.00; CH<sub>3</sub>OH), (D) [α]<sub>D</sub><sup>20</sup> = -18.4 (c 1.00; CH<sub>3</sub>OH).

#### Cbz-L-αMv<sub>2</sub>-Aib<sub>4</sub>-OH – S9

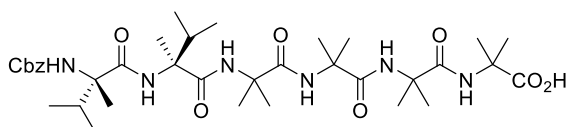

Prepared as previously reported.<sup>4</sup>

#### Cbz-L-αMv<sub>2</sub>-Aib<sub>5</sub>-L-αMv<sub>2</sub>-NHMe – Ia

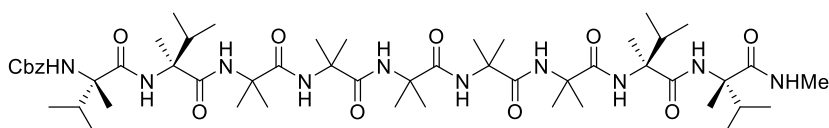

From **S9** (72 mg, 0.10 mmol), EDC.HCl (25 mg, 0.13 mmol), DIPEA (23  $\mu$ L, 0.13 mmol) and **L-S8** (52 mg, 0.15 mmol) according to **General Procedure F**. Crude **Ia** was purified by flash column chromatography (99:1 DCM:MeOH increasing to 90:10) to give the pure product as a white powder (64 mg, 0.06 mmol, 61%).  $R_f$  0.22 (19:1 DCM:MeOH); **m.p.** >250 °C;  $\delta_H$  (500 MHz, CDCl<sub>3</sub>) 7.79 (1H, s, CONH), 7.77 (1H, s, CONH), 7.72 (1H, s, CONH), 7.63 (1H, s, CONH), 7.59 (1H, s, CONH), 7.38 (5H, m, PhH), 7.33 (2H, s, CONH), 7.00 (1H, s, CONH), 6.37 (1H, s, CONH), 5.21 (1H, s, CONH), 5.19 (1H, d,  $J$  = 12.2, PhCH<sub>2</sub>), 5.03 (1H, d,  $J$  = 12.2, PhCH<sub>2</sub>), 2.80 (3H, d,  $J$  = 4.6, NHCH<sub>3</sub>), 2.15 (1H, sep,  $J$  = 6.7, CH(CH<sub>3</sub>)<sub>2</sub>), 2.07 (1H, sep,  $J$  = 6.8, CH(CH<sub>3</sub>)<sub>2</sub>), 1.86 (1H, sep,  $J$  = 6.7, CH(CH<sub>3</sub>)<sub>2</sub>), 1.53 (1H, m, CH(CH<sub>3</sub>)<sub>2</sub>), 1.51 (3H, s, NHC(CH<sub>3</sub>)<sub>2</sub>), 1.49 (6H, s, NHC(CH<sub>3</sub>)<sub>2</sub>), 1.49 (3H, s, NHC(CH<sub>3</sub>)<sub>2</sub>), 1.49 (6H, s, NHC(CH<sub>3</sub>)<sub>2</sub>), 1.47 (3H, s, NHC(CH<sub>3</sub>)<sub>2</sub>), 1.47 (3H, s, NHC(CH<sub>3</sub>)<sub>2</sub>), 1.47 (3H, s, NHC(CH<sub>3</sub>)<sub>2</sub>), 1.46 (3H, s, NHC(CH<sub>3</sub>)), 1.45 (6H, s, NHC(CH<sub>3</sub>)), 1.41 (3H, s, NHC(CH<sub>3</sub>)), 1.37 (3H, s, NHC(CH<sub>3</sub>)), 1.07 (3H, d,  $J$  = 6.7, CH(CH<sub>3</sub>)<sub>2</sub>), 1.02 (3H, d,  $J$  = 6.7, CH(CH<sub>3</sub>)<sub>2</sub>), 1.00 (3H, d,  $J$  = 6.8, CH(CH<sub>3</sub>)<sub>2</sub>), 0.97 (3H, d,  $J$  = 6.8, CH(CH<sub>3</sub>)<sub>2</sub>), 0.96 (3H, d,  $J$  = 7.1, CH(CH<sub>3</sub>)<sub>2</sub>), 0.95 (3H, d,  $J$  = 7.1, CH(CH<sub>3</sub>)<sub>2</sub>), 0.80 (3H, d,  $J$  = 6.5, NHC(CH<sub>3</sub>)<sub>2</sub>), 0.79 (3H, d,  $J$  = 6.4, CH(CH<sub>3</sub>)<sub>2</sub>);  $\delta_C$  (100 MHz, CDCl<sub>3</sub>) 1794, 176.3, 175.9, 175.6, 175.6, 175.4, 173.4, 173.2, 172.6 (CONH), 156.4 (CO<sub>2</sub>Bn), 135.8, 128.9, 128.9, 128.7 (Ar), 67.9 (PhCH<sub>2</sub>), 63.6, 63.5, 63.3, 62.5 (NHC(CH<sub>3</sub>)), 57.0, 56.9, 56.8, 56.7 (NHC(CH<sub>3</sub>)<sub>2</sub>), 36.2, 35.9, 35.8, 35.8 (CH(CH<sub>3</sub>)<sub>2</sub>), 27.7, 27.6, 27.4, 27.4, 27.3 (NHC(CH<sub>3</sub>)<sub>2</sub>), 26.5 (NHCH<sub>3</sub>), 23.0, 23.0, 22.9, 22.8 (NHC(CH<sub>3</sub>)<sub>2</sub>), 18.2, 18.1, 18.0, 17.5, 17.5, 17.4, 17.3, 17.2, 17.1, 16.7, 16.2, 16.2 (CH(CH<sub>3</sub>)<sub>2</sub>);  $\nu_{max}/cm^{-1}$  3296m (N-H), 2982m (C-H), 1656s (C=O), 1531m (C-N);  $m/z$  (ESI<sup>+</sup>) 1065.9 ([M+Na]<sup>+</sup>, 100%), HRMS (ESI<sup>+</sup>) found [M+H]<sup>+</sup> 1043.6816 [C<sub>53</sub>H<sub>91</sub>N<sub>10</sub>O<sub>11</sub>]<sup>+</sup> requires 1043.6869;  $[\alpha]_D^{20}$  = +24.3 (c 1.00; (CH<sub>3</sub>Cl)).

### Cbz-L- $\alpha$ Mv<sub>2</sub>-Aib<sub>5</sub>-D- $\alpha$ Mv<sub>2</sub>-NHMe – **Ib**

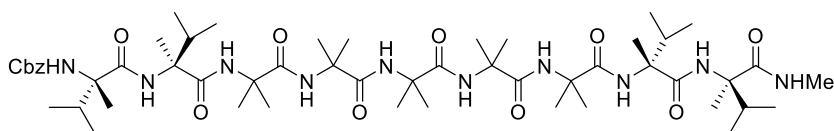

From **S9** (65 mg, 0.09 mmol), EDC.HCl (19 mg, 0.10 mmol), DIPEA (17  $\mu$ L, 0.10 mmol) and **D-**

**S8** (37 mg, 0.11 mmol) according to **General Procedure F**. Crude **Ib** was purified by flash column chromatography (96:4 DCM:MeOH increasing to 94:6) to give the pure product as a white powder (49 mg, 0.05 mmol, 56%).  $R_f$  0.23 (1:1 EtOAc:DCM); **m.p.** 254-256 °C;  $\delta_H$  (400 MHz, CDCl<sub>3</sub>) 7.77 (1H, s, CONH), 7.69 (1H, s, CONH), 7.60 (2H, s, CONH), 7.68 (1H, s, CONH), 7.57 (1H, s, CONH), 7.47 (1H, s, CONH), 7.36 (5H, s, PhH), 7.20 (1H, s, CONH), 6.48 (1H, s, CONH), 5.60 (1H, s, CONH), 5.17 (1H, d,  $J$  = 12.1, PhCH<sub>2</sub>), 5.03 (1H, d,  $J$  = 12.1, PhCH<sub>2</sub>), 2.81 (3H, d,  $J$  = 4.5, NHCH<sub>3</sub>), 2.51 (1H, sep,  $J$  = 6.7, CH(CH<sub>3</sub>)<sub>2</sub>), 2.09 (1H, sep,  $J$  = 6.7, CH(CH<sub>3</sub>)<sub>2</sub>), 1.91 (1H, m, CH(CH<sub>3</sub>)<sub>2</sub>), 1.60 (1H, sep,  $J$  = 6.8, CH(CH<sub>3</sub>)<sub>2</sub>), 1.52 (3H, s, NHC(CH<sub>3</sub>)<sub>2</sub>), 1.50 (6H, s, NHC(CH<sub>3</sub>)<sub>2</sub>), 1.49 (3H, s, NHC(CH<sub>3</sub>)<sub>2</sub>), 1.47 (6H, s, NHC(CH<sub>3</sub>)<sub>2</sub>), 1.47 (3H, s, NHC(CH<sub>3</sub>)<sub>2</sub>), 1.46 (6H, s, NHC(CH<sub>3</sub>)<sub>2</sub>), 1.45 (3H, s, NHC(CH<sub>3</sub>)<sub>2</sub>), 1.44 (3H, s, NHC(CH<sub>3</sub>)), 1.43 (3H, s, NHC(CH<sub>3</sub>)), 1.39 (3H, s, NHC(CH<sub>3</sub>)), 1.38 (3H, s, NHC(CH<sub>3</sub>)), 0.98 (3H, d,  $J$  = 6.7, CH(CH<sub>3</sub>)<sub>2</sub>), 0.97 (3H,

d,  $J = 6.8$ ,  $\text{CH}(\text{CH}_3)_2$ ), 0.95 (6H, m,  $\text{CH}(\text{CH}_3)_2$ ), 0.95 (3H, d,  $J = 6.7$ ,  $\text{CH}(\text{CH}_3)_2$ ), 0.92 (6H, m,  $\text{CHC}(\text{CH}_3)_2$ ), 0.80 (6H, d,  $J = 6.7$ ,  $\text{CH}(\text{CH}_3)_2$ );  $\delta_{\text{C}}$  (125 MHz,  $\text{CDCl}_3$ ) 176.7, 175.7, 175.4, 175.3, 175.3, 175.1, 173.1, 172.7, 172.5 (CONH), 156.3 ( $\text{CO}_2\text{Bn}$ ), 135.8, 128.7, 128.7, 128.5 (Ar), 67.6 ( $\text{PhCH}_2$ ), 64.2, 63.5, 63.2, 62.5 ( $\text{NHC}(\text{CH}_3)$ ), 57.1, 57.0, 56.8, 56.8 ( $\text{NHC}(\text{CH}_3)_2$ ), 36.1, 35.8, 35.7, 33.7 ( $\text{CH}(\text{CH}_3)_2$ ), 27.0, 26.7, 26.7, 26.6, 25.9 ( $\text{NHC}(\text{CH}_3)_2$ ), 24.9 ( $\text{NHCH}_3$ ), 24.1, 23.7, 23.4, 23.2 ( $\text{NHC}(\text{CH}_3)_2$ ), 18.4, 18.1, 18.0, 17.7, 17.7, 17.5, 17.5, 17.4, 17.3, 17.3, 17.2 ( $\text{CH}(\text{CH}_3)_2$ );  $\nu_{\text{max}}/\text{cm}^{-1}$  3295m (N-H), 2982m (C-H), 1656s (C=O), 1531m (C-N);  $m/z$  (ESI<sup>+</sup>) 1044.2 ( $[\text{M}+\text{H}]^+$ , 100%), 1066.2 ( $[\text{M}+\text{Na}]^+$ , 90%), HRMS (ESI<sup>+</sup>) found  $[\text{M}+\text{H}]^+$  1043.6869  $[\text{C}_{53}\text{H}_{91}\text{N}_{10}\text{O}_{11}]^+$  requires 1043.6869;  $[\alpha]_{\text{D}}^{20} = +23.6$  (c 1.00;  $\text{CH}_3\text{Cl}$ ).

### H-Aib<sub>2</sub>-O<sup>t</sup>Bu – S10

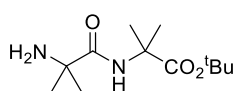

Prepared as previously reported.<sup>5</sup>

### Cbz-L- $\alpha$ Mv-Aib<sub>2</sub>-O<sup>t</sup>Bu – S11

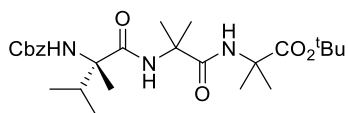

From **L-SI** (941 mg, 3.55 mmol), TFFH (1410 mg, 5.36 mmol), pyridine (0.28 mL, 3.52 mmol), **S10** (461 mg, 1.89 mmol) and DIPEA (0.33 mL, 1.89 mmol) according to **General Procedure C**. Crude **S11** was purified

by flash column chromatography (DCM) and trituration ( $\text{Et}_2\text{O}$ ) to give the pure product (387 mg, 0.79 mmol, 42%).  $R_f$  0.43 (DCM);  $\delta_{\text{H}}$  (500 MHz,  $\text{CDCl}_3$ ) 7.38-7.29 (5H, m, PhH), 5.16 (1H, d,  $J = 12.3$ ,  $\text{PhCH}_2$ ), 5.03 (1H, d,  $J = 12.3$ ,  $\text{PhCH}_2$ ), 2.04 (1H, sep,  $J = 6.9$ ,  $\text{CH}(\text{CH}_3)_2$ ), 1.56-1.40 (12H, m,  $\text{NHC}(\text{CH}_3)_2$ ), 1.44 (9H, s,  $\text{C}(\text{CH}_3)_3$ ), 1.01 – 0.88 (9H, m,  $\text{CH}(\text{CH}_3)_2$ ,  $\text{NHC}(\text{CH}_3)$ );  $\delta_{\text{C}}$  (125 MHz,  $\text{CDCl}_3$ ) 174.2 (CONH), 173.7 (CONH), 172.9 ( $\text{CO}_2\text{C}(\text{CH}_3)_3$ ), 155.7 ( $\text{CO}_2\text{Bn}$ ), 136.1, 128.7, 128.5, 128.2 (Ar), 80.5 ( $\text{C}(\text{CH}_3)_3$ ), 72.2 ( $\text{NHC}(\text{CH}_3)$ ), 67.0 ( $\text{PhCH}_2$ ), 66.7 ( $\text{NHC}(\text{CH}_3)_2$ ), 63.2 ( $\text{NHC}(\text{CH}_3)_2$ ), 38.7 ( $\text{CH}(\text{CH}_3)_2$ ), 27.9 ( $\text{C}(\text{CH}_3)_3$ ), 25.0 ( $\text{NHC}(\text{CH}_3)_2$ ), 24.3 ( $\text{NHC}(\text{CH}_3)_2$ ), 24.1 ( $\text{NHC}(\text{CH}_3)_2$ ), 22.0 ( $\text{NHC}(\text{CH}_3)$ ), 17.2 ( $\text{CH}(\text{CH}_3)_2$ ), 17.1 ( $\text{CH}(\text{CH}_3)_2$ );  $\nu_{\text{max}}/\text{cm}^{-1}$  3350m.br (N-H), 2975m (C-H), 2485s (C-H), 1783s (C=O), 1707s (C=O), 1518s (C-N), 1454m (C-O);  $m/z$  (ESI<sup>+</sup>) 492.4 ( $[\text{M}+\text{H}]^+$ , 100%), 514.4 ( $[\text{M}+\text{Na}]^+$ , 99%), HRMS (ESI<sup>+</sup>) found  $[\text{M}+\text{H}]^+$  492.3066  $[\text{C}_{26}\text{H}_{42}\text{N}_3\text{O}_6]^+$  requires 492.3068;  $[\alpha]_{\text{D}}^{20} = +3.2$  (c 1.25;  $\text{CH}_3\text{OH}$ ).

### H-L- $\alpha$ Mv-Aib<sub>2</sub>-O<sup>t</sup>Bu – S12

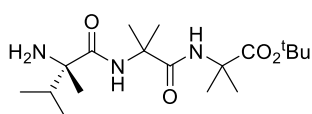

From **S11** (387 mg, 0.94 mmol) according to **General Procedure B**. **S12** obtained as a clear oil (283 mg, 0.80 mmol, 85%).  $R_f$  0.00 ( $\text{EtOAc}$ );  $\delta_{\text{H}}$  (500 MHz,  $\text{CDCl}_3$ ) 8.02 (1H, s, br, CONH), 7.36 (1H, s, br, CONH), 4.21 (1H, s, br,  $\text{NH}_2$ ), 2.23 (1H, sep,  $J = 6.9$ ,  $\text{CH}(\text{CH}_3)_2$ ), 1.51 (6H, s,  $\text{NHC}(\text{CH}_3)_2$ ), 1.45 (6H, s,  $\text{NHC}(\text{CH}_3)$ ), 1.40



(9H, s, C(CH<sub>3</sub>)<sub>3</sub>), 1.34 (3H, s, NHC(CH<sub>3</sub>)), 0.91 (3H, d, *J* = 6.9, CH(CH<sub>3</sub>)<sub>2</sub>), 0.87 (3H, d, *J* = 6.9, CH(CH<sub>3</sub>)<sub>2</sub>);  $\delta_c$  (125 MHz, CDCl<sub>3</sub>) 176.7 (CO<sub>2</sub>C(CH<sub>3</sub>)<sub>3</sub>), 174.3 (CONH), 173.8 (CONH), 80.7 (C(CH<sub>3</sub>)<sub>3</sub>), 60.4 (NHC(CH<sub>3</sub>)), 56.1 (NHC(CH<sub>3</sub>)<sub>2</sub>), 34.4 (CH(CH<sub>3</sub>)<sub>2</sub>), 26.7 (C(CH<sub>3</sub>)<sub>3</sub>), 23.8 (NHC(CH<sub>3</sub>)<sub>2</sub>), 23.7 (NHC(CH<sub>3</sub>)<sub>2</sub>), 23.4 (NHC(CH<sub>3</sub>)<sub>2</sub>), 23.1 (NHC(CH<sub>3</sub>)), 16.3 (CH(CH<sub>3</sub>)<sub>2</sub>), 16.2 (CH(CH<sub>3</sub>)<sub>2</sub>);  $\nu_{\max}/\text{cm}^{-1}$  3307w.br (N-H), 2973m (C-H), 1731m (C=O), 1650s (C=O), 1507m (C-N); *m/z* (ESI<sup>+</sup>) 358.4 ([M+H]<sup>+</sup>, 100%), 380.4 ([M+Na]<sup>+</sup>, 80%), HRMS (ESI<sup>+</sup>) found [M+H]<sup>+</sup> 358.2694 [C<sub>18</sub>H<sub>36</sub>N<sub>3</sub>O<sub>4</sub>]<sup>+</sup> requires 358.2700;  $[\alpha]_D^{20} = -19.6$  (c 1.00; CH<sub>3</sub>OH).

### Cbz-L- $\alpha$ Mv<sub>2</sub>-Aib<sub>2</sub>-O<sup>t</sup>Bu – S13

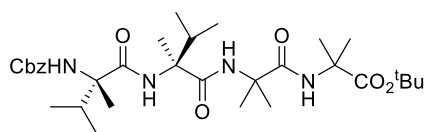

From **L-SI** (387 mg, 1.46 mmol), TFFH (578 mg, 2.19 mmol), pyridine (118  $\mu$ L, 1.46 mmol), **S12** (178 mg, 0.73 mmol) and DIPEA (130  $\mu$ L, 0.73 mmol) according to **General Procedure C**. Crude **S13** was

purified by flash column chromatography (99:1 DCM:MeOH increasing to 19:1) to give the pure product (190 mg, 0.31 mmol, 43%). *R<sub>f</sub>* 0.30 (98:2 DCM:MeOH);  $\delta_H$  (500 MHz, CDCl<sub>3</sub>) 7.39-7.33 (5H, m, PhH), 7.19 (1H, s, br, CONH), 6.32 (1H, s, br, CONH), 5.18 (1H, d, *J* = 12.0, PhCH<sub>2</sub>), 5.15 (1H, s, br, CONH), 5.00 (1H, d, *J* = 12.0, PhCH<sub>2</sub>), 2.81 (1H, s, CONH) 1.88 (2H, m, CH(CH<sub>3</sub>)<sub>2</sub>), 1.53 (3H, s, NHC(CH<sub>3</sub>)<sub>2</sub>), 1.49 (3H, s, NHC(CH<sub>3</sub>)<sub>2</sub>), 1.45 (6H, s, NHC(CH<sub>3</sub>)), 1.43 (12H, s, C(CH<sub>3</sub>)<sub>3</sub>, NHC(CH<sub>3</sub>)<sub>2</sub>), 1.40 (3H, s, NHC(CH<sub>3</sub>)<sub>2</sub>), 0.97 (3H, d, *J* = 6.8, CH(CH<sub>3</sub>)<sub>2</sub>), 0.96 (3H, d, *J* = 6.9, CH(CH<sub>3</sub>)<sub>2</sub>), 0.79 (3H, d, *J* = 6.8, CH(CH<sub>3</sub>)<sub>2</sub>), 0.76 (3H, d, *J* = 6.9, CH(CH<sub>3</sub>)<sub>2</sub>);  $\delta_c$  (125 MHz, CDCl<sub>3</sub>) 174.0 (CONH), 173.5 (CONH), 171.8 (CONH), 170.9 (CO<sub>2</sub>C(CH<sub>3</sub>)<sub>3</sub>), 155.9 (CO<sub>2</sub>Bn), 135.7, 128.7 (Ar), 79.8 (C(CH<sub>3</sub>)<sub>3</sub>), 67.6 (PhCH<sub>2</sub>), 63.4 (NHC(CH<sub>3</sub>)<sub>2</sub>), 62.5 (NHC(CH<sub>3</sub>)<sub>2</sub>), 56.8 (NHC(CH<sub>3</sub>)<sub>2</sub>), 56.0 (NHC(CH<sub>3</sub>)<sub>2</sub>), 36.0 (CH(CH<sub>3</sub>)<sub>2</sub>), 35.9 (CH(CH<sub>3</sub>)<sub>2</sub>), 27.9 (C(CH<sub>3</sub>)<sub>3</sub>), 27.8 (NHC(CH<sub>3</sub>)<sub>2</sub>), 25.8 (NHC(CH<sub>3</sub>)<sub>2</sub>), 23.6 (NHC(CH<sub>3</sub>)), 23.1 (NHC(CH<sub>3</sub>)), 18.5 (CH(CH<sub>3</sub>)<sub>2</sub>), 18.1 (CH(CH<sub>3</sub>)<sub>2</sub>), 17.1 (CH(CH<sub>3</sub>)<sub>2</sub>), 17.0 (CH(CH<sub>3</sub>)<sub>2</sub>);  $\nu_{\max}/\text{cm}^{-1}$  3330m.br (N-H), 2975m (C-H), 1783s (C=O), 1706s (C=O), 1668m (C=O), 1517m (C-N); *m/z* (ESI<sup>+</sup>) 606.0 ([M+H]<sup>+</sup>, 100%), HRMS (ESI<sup>+</sup>) found [M+H]<sup>+</sup> 605.3906 [C<sub>32</sub>H<sub>53</sub>N<sub>4</sub>O<sub>7</sub>]<sup>+</sup> requires 605.3909;  $[\alpha]_D^{20} = +8.7$  (c 0.97, CH<sub>3</sub>OH).

### Cbz-L- $\alpha$ Mv<sub>2</sub>-Aib<sub>2</sub>-OH – S14

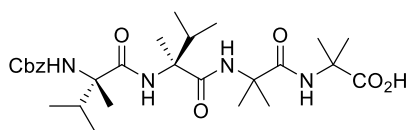

To a stirred solution of **S13** (50 mg, 0.08 mmol) and thioanisole (170  $\mu$ L, 1.45 mmol) in DCM (0.20 mL) at 0 °C was added TFA (190  $\mu$ L, 2.50 mmol) dropwise. The reaction was stirred at rt for 4 h

before the solvent was removed *in vacuo*. The crude product was purified by column chromatography (99:1

DCM:MeOH increasing to 19:1) to give pure **S14** as a white solid (40 mg, 0.08 mmol, *quant.*).  $R_f$  0.16 (19:1 DCM:MeOH); **m.p.** 249-251 °C;  $\delta_H$  (500 MHz, CDCl<sub>3</sub>) 7.80 (1H, s, CONH), 7.61 (1H, s, CONH), 7.43-7.30 (5H, m, PhH), 6.98 (1H, s, CONH), 5.20 (1H, d,  $J = 12.4$ , PhCH<sub>2</sub>), 5.04 (1H, d,  $J = 12.4$ , PhCH<sub>2</sub>), 1.93 (1H, sep,  $J = 6.8$ , CH(CH<sub>3</sub>)<sub>2</sub>), 1.56 (1H, sep,  $J = 6.8$ , CH(CH<sub>3</sub>)<sub>2</sub>), 1.51 (6H, s, C(CH<sub>3</sub>)<sub>2</sub>CO<sub>2</sub>H), 1.46 (3H, s, NHC(CH<sub>3</sub>)<sub>2</sub>), 1.44 (3H, s, NHC(CH<sub>3</sub>)<sub>2</sub>), 1.42 NHC(CH<sub>3</sub>), 1.37 (3H, s, NHC(CH<sub>3</sub>)<sub>2</sub>), 1.00 (3H, d,  $J = 6.8$ , CH(CH<sub>3</sub>)<sub>2</sub>), 0.95 (3H, d,  $J = 6.8$ , CH(CH<sub>3</sub>)<sub>2</sub>), 0.83 (3H, d,  $J = 6.8$ , CH(CH<sub>3</sub>)<sub>2</sub>), 0.80 (3H, d,  $J = 6.8$ , CH(CH<sub>3</sub>)<sub>2</sub>);  $\delta_C$  (125 MHz, CDCl<sub>3</sub>) 181.5 (CO<sub>2</sub>H), 176.7 (CONH), 175.0 (CONH), 173.7 (CONH), 158.3 (CO<sub>2</sub>Bn), 138.3, 129.6, 129.3 (Ar), 68.0 (PhCH<sub>2</sub>), 64.5 (NHC(CH<sub>3</sub>)), 63.9 (NHC(CH<sub>3</sub>)), 58.1 (NHC(CH<sub>3</sub>)<sub>2</sub>), 55.1 (NHC(CH<sub>3</sub>)<sub>2</sub>), 37.0 (CH(CH<sub>3</sub>)<sub>2</sub>), 36.8 (CH(CH<sub>3</sub>)<sub>2</sub>), 28.1 (NHC(CH<sub>3</sub>)<sub>2</sub>), 26.4 (NHC(CH<sub>3</sub>)<sub>2</sub>), 24.3 (NHC(CH<sub>3</sub>)), 23.5 (NHC(CH<sub>3</sub>)), 18.7 (CH(CH<sub>3</sub>)<sub>2</sub>), 18.4 (CH(CH<sub>3</sub>)<sub>2</sub>), 17.9 (CH(CH<sub>3</sub>)<sub>2</sub>), 17.5 (CH(CH<sub>3</sub>)<sub>2</sub>);  $\nu_{max}/cm^{-1}$  2980w.br (C-H), 1656s (C=O), 1416s (C-N);  $m/z$  (ESI<sup>-</sup>) 547.6 ([M-H]<sup>-</sup>, 100%), HRMS (ESI<sup>+</sup>) found [M+H]<sup>+</sup> 549.3277 [C<sub>28</sub>H<sub>45</sub>N<sub>4</sub>O<sub>7</sub>]<sup>+</sup> requires 549.3283;  $[\alpha]_D^{20} = +28.2$  (c 1.00; CH<sub>3</sub>OH).

### N<sub>3</sub>-Aib<sub>2</sub>-L/D- $\alpha$ Mv<sub>2</sub>-NHMe – S15

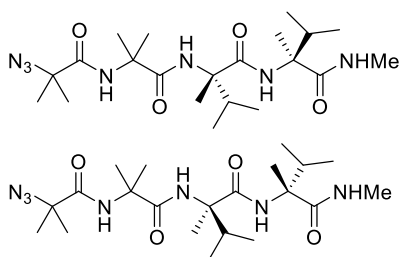

From **S6** (85 mg, 0.66 mmol), oxalyl chloride (62  $\mu$ L, 0.73 mmol), **S8** (113 mg, 0.33 mmol) and Et<sub>3</sub>N (90  $\mu$ L, 0.66 mmol) according to **General Procedure A**. Crude **S15** was purified by flash column chromatography (99:1 DCM:MeOH increasing to 19:1) to give the pure product as a white solid (97 mg, 0.21 mmol, 65%).  $R_f$  0.50 (19:1 DCM:MeOH); **m.p.** 156-158 °C;  $\delta_H$  (400 MHz, CDCl<sub>3</sub>) 7.20 (1H, d, br,  $J = 4.4$ , CO<sub>2</sub>NHCH<sub>3</sub>), 6.86 (1H, s, CONH), 6.77 (1H, s, CONH), 6.43 (1H, s, CONH), 2.77 (3H, d,  $J = 4.4$ , CONHCH<sub>3</sub>), 2.02 (1H, sep,  $J = 6.9$ , CH(CH<sub>3</sub>)<sub>2</sub>), 1.93 (1H, sep,  $J = 6.9$ , CH(CH<sub>3</sub>)<sub>2</sub>), 1.53 (3H, s, CONHC(CH<sub>3</sub>)<sub>2</sub>), 1.50 (3H, s, CONHC(CH<sub>3</sub>)<sub>2</sub>), 1.48 (9H, s, N<sub>3</sub>C(CH<sub>3</sub>)<sub>2</sub>, CONHC(CH<sub>3</sub>), CONHC(CH<sub>3</sub>)), 1.38 (3H, s, N<sub>3</sub>C(CH<sub>3</sub>)<sub>2</sub>), 0.93 (3H, d,  $J = 6.9$ , CH(CH<sub>3</sub>)<sub>2</sub>), 0.91 (3H, d,  $J = 6.9$ , CH(CH<sub>3</sub>)<sub>2</sub>), 0.90 (3H, d,  $J = 6.9$ , CH(CH<sub>3</sub>)<sub>2</sub>), 0.90 (3H, d,  $J = 6.9$ , CH(CH<sub>3</sub>)<sub>2</sub>);  $\delta_C$  (100 MHz, CDCl<sub>3</sub>) 174.6 (CONH), 173.7 (CONH), 173.0 (CONH), 171.3 (CONH), 64.3 (NHC(CH<sub>3</sub>)), 63.6 (NHC(CH<sub>3</sub>)), 63.1 (CONHC(CH<sub>3</sub>)<sub>2</sub>), 57.6 (N<sub>3</sub>C(CH<sub>3</sub>)<sub>2</sub>), 36.0 (CH(CH<sub>3</sub>)<sub>2</sub>), 35.9 (CH(CH<sub>3</sub>)<sub>2</sub>), 26.6 (N<sub>3</sub>C(CH<sub>3</sub>)<sub>2</sub>), 26.4 (NHCH<sub>3</sub>), 24.5 (N<sub>3</sub>C(CH<sub>3</sub>)<sub>2</sub>), 24.5 (NHC(CH<sub>3</sub>)<sub>2</sub>), 23.7 (NHC(CH<sub>3</sub>)<sub>2</sub>), 18.8 (NHC(CH<sub>3</sub>)<sub>2</sub>), 17.7 (NHC(CH<sub>3</sub>)), 17.6 (CH(CH<sub>3</sub>)<sub>2</sub>), 17.3 (CH(CH<sub>3</sub>)<sub>2</sub>), 17.2 (CH(CH<sub>3</sub>)<sub>2</sub>), 17.1 (CH(CH<sub>3</sub>)<sub>2</sub>);  $\nu_{max}/cm^{-1}$  3344m.br (N-H), 2972m (C-H), 2111s (N<sub>3</sub>), 1656m (C=O), 1510m (C-N);  $m/z$  (ESI<sup>+</sup>) 476.4 ([M+Na]<sup>+</sup>, 100%), HRMS (ESI<sup>+</sup>) found [M+Na]<sup>+</sup> 476.2961 [C<sub>21</sub>H<sub>39</sub>N<sub>7</sub>O<sub>4</sub>Na]<sup>+</sup> requires 476.2956; (L)  $[\alpha]_D^{20} = +20.4$  (c 1.00; CH<sub>3</sub>OH), (D)  $[\alpha]_D^{20} = -20.3$  (c 1.00; CH<sub>3</sub>OH).

### H-Aib<sub>2</sub>-L/D- $\alpha$ Mv<sub>2</sub>-NHMe – S16

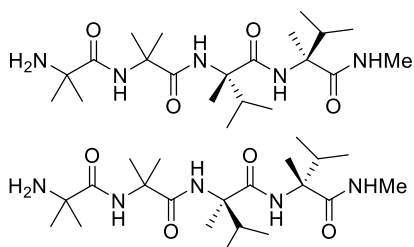

From **S15** (97 mg, 0.21 mmol) according to **General Procedure B**. **S16** was obtained as a clear oil (92 mg, 0.21 mmol, *quant.*).  $R_f$  0.00

(EtOAc);  $\delta_{\text{H}}$  (400 MHz, CD<sub>3</sub>OD) 2.74 (3H, s, CONHCH<sub>3</sub>), 2.09-2.00 (2H, m, CH(CH<sub>3</sub>)<sub>2</sub>), 1.54 (3H, s, H<sub>2</sub>NC(CH<sub>3</sub>)<sub>2</sub>) 1.56 (3H, s, H<sub>2</sub>NC(CH<sub>3</sub>)<sub>2</sub>), 1.49 (3H, s, CONHC(CH<sub>3</sub>)<sub>2</sub>), 1.49 (3H, s, CONHC(CH<sub>3</sub>)<sub>2</sub>), 1.45 (CONHC(CH<sub>3</sub>), 1.38 (CONHC(CH<sub>3</sub>), 1.03 (3H, d, *J* = 6.8, CH(CH<sub>3</sub>)<sub>2</sub>), 0.97 (3H, d, *J* = 6.8, CH(CH<sub>3</sub>)<sub>2</sub>), 0.95 (3H, d, *J* = 7.0, CH(CH<sub>3</sub>)<sub>2</sub>), 0.93 (3H, d, *J* = 7.0, CH(CH<sub>3</sub>)<sub>2</sub>);  $\delta_{\text{C}}$  (125 MHz, CD<sub>3</sub>OD) 176.8 (CONHCH<sub>3</sub>), 176.5 (CONH), 173.4 (CONH), 173.3 (CONH), 64.9 (NHC(CH<sub>3</sub>), 64.8 (NHC(CH<sub>3</sub>), 64.5 (CONHC(CH<sub>3</sub>)<sub>2</sub>), 58.6 (H<sub>2</sub>NC(CH<sub>3</sub>)<sub>2</sub>), 37.1 (CH(CH<sub>3</sub>)<sub>2</sub>), 36.7 (CH(CH<sub>3</sub>)<sub>2</sub>), 26.5 (H<sub>2</sub>NC(CH<sub>3</sub>)<sub>2</sub>), 26.1 (CONHCH<sub>3</sub>), 25.6 (CONHC(CH<sub>3</sub>)<sub>2</sub>), 25.5 (CONHC(CH<sub>3</sub>)<sub>2</sub>), 23.9 CONHC(CH<sub>3</sub>), 18.3 (H<sub>2</sub>NC(CH<sub>3</sub>)<sub>2</sub>), 18.3 (CONHC(CH<sub>3</sub>), 18.2 (CH(CH<sub>3</sub>)<sub>2</sub>), 17.7 (CH(CH<sub>3</sub>)<sub>2</sub>), 17.6 (CH(CH<sub>3</sub>)<sub>2</sub>), 17.6 (CH(CH<sub>3</sub>)<sub>2</sub>);  $\nu_{\text{max}}/\text{cm}^{-1}$  3356m.br (N-H), 2970m (C-H), 2485s (C-H), 1655s (C=O), 1519w (C-N), 1409m (C-N); *m/z* (ESI<sup>+</sup>) 428.4 ([M+H]<sup>+</sup>, 100%), HRMS (ESI<sup>+</sup>) found [M+Na]<sup>+</sup> 450.3050 [C<sub>21</sub>H<sub>41</sub>N<sub>5</sub>O<sub>4</sub>Na]<sup>+</sup> requires 450.3051; (L)  $[\alpha]_{\text{D}}^{20} = +14.8$  (c 1.00, CH<sub>3</sub>OH), (D)  $[\alpha]_{\text{D}}^{20} = -14.8$  (c 1.00, CH<sub>3</sub>OH).

### Cbz-Ac<sub>3</sub>C-Aib<sub>2</sub>-L/D- $\alpha$ Mv<sub>2</sub>-NHMe – S17

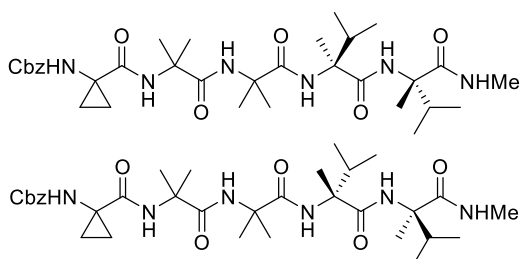

From Cbz-Ac<sub>3</sub>C-OH (99 mg, 0.42 mmol), TFFH (166 mg, 0.63 mmol), pyridine (34  $\mu$ L, 0.42 mmol), **S16** (91 mg, 0.21 mmol) and DIPEA (37  $\mu$ L, 0.21 mmol) according to **General Procedure C**. Crude **S17** was purified by flash column chromatography (99:1 DCM:MeOH increasing to 19:1) to give the pure product (110 mg, 0.17 mmol, 80%). *R<sub>f</sub>*

0.30 (94:6 DCM:MeOH); *m.p.* 248-250 °C;  $\delta_{\text{H}}$  (500 MHz, CDCl<sub>3</sub>) 7.46-7.06 (10H, m, PhH, CONH), 6.87 (1H, s, br, NHCH<sub>3</sub>), 5.21 (1H, d, *J* = 12.0, PhCH<sub>2</sub>), 5.06 (1H, d, *J* = 12.0, PhCH<sub>2</sub>), 2.73 (3H, s, NHCH<sub>3</sub>), 2.01 (1H, sep, *J* = 6.1, CH(CH<sub>3</sub>)<sub>2</sub>), 2.00 (1H, sep, *J* = 6.1, CH(CH<sub>3</sub>)<sub>2</sub>), 1.88-1.16 (22H, m, C(CH<sub>2</sub>-CH<sub>2</sub>), NHC(CH<sub>3</sub>)<sub>2</sub>, NHC(CH<sub>3</sub>)<sub>2</sub>, NHC(CH<sub>3</sub>), NHC(CH<sub>3</sub>)), 0.98 (6H, d, *J* = 6.1, CH(CH<sub>3</sub>)<sub>2</sub>), 0.90 (6H, d, *J* = 6.1, CH(CH<sub>3</sub>)<sub>2</sub>);  $\delta_{\text{C}}$  (125 MHz, CDCl<sub>3</sub>) 183.8 (CONH), 175.9 (CONH), 175.7 (CONH), 174.4 (CONH), 173.3 (CONH), 157.8 (CO<sub>2</sub>Bn), 136.8, 128.7, 128.5, 128.0 (Ar), 63.4 (NHC(CH<sub>3</sub>)), 63.4 (NHC(CH<sub>3</sub>)), 56.6 (PhCH<sub>2</sub>), 55.6 (NHC(CH<sub>3</sub>)<sub>2</sub>, NHC(CH<sub>3</sub>)<sub>2</sub>), 36.8 (C(CH<sub>2</sub>-CH<sub>2</sub>)), 35.8 (CH(CH<sub>3</sub>)<sub>2</sub>), 35.7 (CH(CH<sub>3</sub>)<sub>2</sub>), 31.1 (NHCH<sub>3</sub>), 27.3 (NHC(CH<sub>3</sub>)<sub>2</sub>), 27.1 (NHC(CH<sub>3</sub>)<sub>2</sub>), 27.0 (NHC(CH<sub>3</sub>)<sub>2</sub>), 26.6 (NHC(CH<sub>3</sub>)<sub>2</sub>), 23.3 (NHC(CH<sub>3</sub>), 23.0 (NHC(CH<sub>3</sub>), 17.9 (CH(CH<sub>3</sub>)<sub>2</sub>), 17.8 (CH(CH<sub>3</sub>)<sub>2</sub>), 17.5 (CH(CH<sub>3</sub>)<sub>2</sub>), 17.4 (CH(CH<sub>3</sub>)<sub>2</sub>), 17.0 (C(CH<sub>2</sub>-CH<sub>2</sub>), 15.9 (C(CH<sub>2</sub>-CH<sub>2</sub>);  $\nu_{\text{max}}/\text{cm}^{-1}$  3336m (N-H), 3268m (N-H), 2973m (C-H), 1658s (C=O), 1529m (C-N); *m/z* (ESI<sup>+</sup>) 345.8 ([M+H]<sup>+</sup>, 100%), 667.8 ([M+Na]<sup>+</sup>, 60%), HRMS (ESI<sup>+</sup>) found [M+H]<sup>+</sup> 645.3968 [C<sub>33</sub>H<sub>53</sub>N<sub>6</sub>O<sub>7</sub>]<sup>+</sup> requires 645.3970; (L)  $[\alpha]_{\text{D}}^{20} = +39.6$  (c 0.95; CH<sub>3</sub>OH), (D)  $[\alpha]_{\text{D}}^{20} = -39.6$  (c 1.00; CH<sub>3</sub>OH).

### H-Ac<sub>3</sub>C-Aib<sub>2</sub>-L/D- $\alpha$ Mv<sub>2</sub>-NHMe – S18

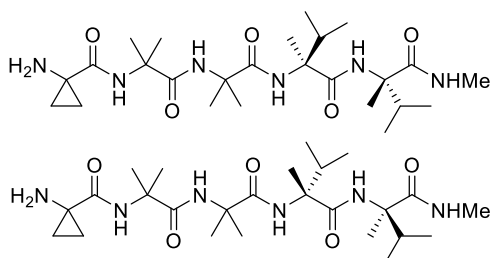

From **S17** (110 mg, 0.17 mmol) according to **General Procedure B**. **S18** was obtained as white powder (86 mg,

0.17 mmol, *quant.*).  $R_f$  0.00 (EtOAc); **m.p.** >190 °C (decomp);  $\delta_H$  (400 MHz, CD<sub>3</sub>OD) 2.75 (3H, s, NHCH<sub>3</sub>), 2.15 (1H, sep,  $J = 6.8$ , CH(CH<sub>3</sub>)<sub>2</sub>), 2.06 (1H, sep,  $J = 6.8$ , CH(CH<sub>3</sub>)<sub>2</sub>), 1.46 (3H, s, NHC(CH<sub>3</sub>)<sub>2</sub>), 1.45 (3H, s, NHC(CH<sub>3</sub>)<sub>2</sub>), 1.43 (6H, s, NHC(CH<sub>3</sub>)<sub>2</sub>), 1.36 (3H, s, NHC(CH<sub>3</sub>)), 1.30 (3H, s, NHC(CH<sub>3</sub>)), 1.26-1.23 (2H, m, C(CH<sub>2</sub>-CH<sub>2</sub>)), 1.02 (3H, d,  $J = 6.8$ , CH(CH<sub>3</sub>)<sub>2</sub>), 0.98 (3H, d,  $J = 6.8$ , CH(CH<sub>3</sub>)<sub>2</sub>), 0.93-0.87 (8H, m, CH(CH<sub>3</sub>)<sub>2</sub>, C(CH<sub>2</sub>-CH<sub>2</sub>));  $\delta_C$  (100 MHz, CDCl<sub>3</sub>) 177.7 (CONH), 177.5 (CONH), 177.5 (CONH), 176.3 (CONH), 175.5 (CONH), 64.7 (NHC(CH<sub>3</sub>)), 64.6 (NHC(CH<sub>3</sub>)), 57.7 (NHC(CH<sub>3</sub>)<sub>2</sub>), 57.6 (NHC(CH<sub>3</sub>)<sub>2</sub>), 37.0 (C(CH<sub>2</sub>-CH<sub>2</sub>)), 36.9 (CH(CH<sub>3</sub>)<sub>2</sub>), 36.5 (CH(CH<sub>3</sub>)<sub>2</sub>), 27.4 (NHCH<sub>3</sub>), 26.6 (NHC(CH<sub>3</sub>)<sub>2</sub>), 26.5 (NHC(CH<sub>3</sub>)<sub>2</sub>), 24.2 (NHC(CH<sub>3</sub>)), 23.4 (NHC(CH<sub>3</sub>)), 18.3 (C(CH<sub>2</sub>-CH<sub>2</sub>)), 18.2 (C(CH<sub>2</sub>-CH<sub>2</sub>)), 17.9 (CH(CH<sub>3</sub>)<sub>2</sub>), 17.5 (CH(CH<sub>3</sub>)<sub>2</sub>), 17.1 (CH(CH<sub>3</sub>)<sub>2</sub>), 16.4 (CH(CH<sub>3</sub>)<sub>2</sub>);  $\nu_{max}/cm^{-1}$  3338m.br (N-H), 2970m (C-H), 1646s (C=O), 1424s (C-N);  $m/z$  (ESI<sup>+</sup>) 512 ([M+H]<sup>+</sup>, 100%), 534 ([M+Na]<sup>+</sup>, 80%), HRMS (ESI<sup>+</sup>) found [M+H]<sup>+</sup> 511.3598 [C<sub>25</sub>H<sub>47</sub>N<sub>6</sub>O<sub>5</sub>]<sup>+</sup> requires 321.3602; (L)  $[\alpha]_D^{20} = +9.2$  (c 1.00; CH<sub>3</sub>OH), (D)  $[\alpha]_D^{20} = -8.6$  (c 1.01; CH<sub>3</sub>OH).

### Cbz-L- $\alpha$ Mv<sub>2</sub>-Aib<sub>2</sub>-Ac<sub>3</sub>C-Aib<sub>2</sub>-L- $\alpha$ Mv<sub>2</sub>-NHMe – 2a

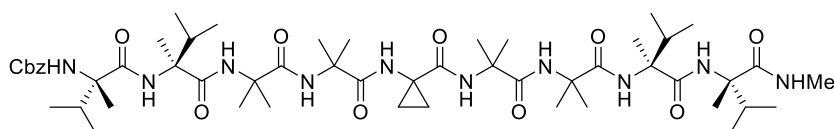

From **S14** (50 mg, 0.09 mmol),  
EDC.HCl (26 mg, 0.14 mmol),  
DIPEA (24  $\mu$ L, 0.14 mmol) and L-

**S18** (47 mg, 0.09 mmol) according to **General Procedure F**. Crude **2a** was purified by flash column chromatography (99:1 DCM:MeOH increasing to 19:1) to give the pure product as a white powder (38 mg, 0.04 mmol, 44%).  $R_f$  0.21 (19:1 DCM:MeOH); **m.p.** >250 °C;  $\delta_H$  (500 MHz, CDCl<sub>3</sub>) 8.25 (1H, s, CONH), 7.94 (1H, s, CONH), 7.78 (1H, s, CONH), 7.68 (1H, s, CONH), 7.43 (1H, s, CONH), 7.37 (6H, s, PhH, CONH), 7.22 (1H, s, CONH), 7.01 (1H, s, CONH), 6.42 (1H, s, CONH), 5.48 (1H, s, CONH), 5.18 (1H, d,  $J = 12.1$ , PhCH<sub>2</sub>), 5.03 (1H, d,  $J = 12.1$ , PhCH<sub>2</sub>), 2.78 (3H, d,  $J = 4.5$ , NHCH<sub>3</sub>), 2.12 (1H, sep,  $J = 7.2$ , CH(CH<sub>3</sub>)<sub>2</sub>), 1.98 (1H, sep,  $J = 6.7$ , CH(CH<sub>3</sub>)<sub>2</sub>), 1.87 (1H, sep,  $J = 6.9$ , CH(CH<sub>3</sub>)<sub>2</sub>), 1.71-1.63 (3H, m, C(CH<sub>2</sub>-CH<sub>2</sub>), CH(CH<sub>3</sub>)<sub>2</sub>), 1.55 (3H, s, NHC(CH<sub>3</sub>)<sub>2</sub>), 1.51 (8H, s, NHC(CH<sub>3</sub>)<sub>2</sub>, C(CH<sub>2</sub>-CH<sub>2</sub>)), 1.50 (6H, s, NHC(CH<sub>3</sub>)<sub>2</sub>), 1.48 (3H, s, NHC(CH<sub>3</sub>)<sub>2</sub>), 1.47 (6H, s, NHC(CH<sub>3</sub>)<sub>2</sub>), 1.43 (3H, s, NHC(CH<sub>3</sub>)), 1.41 (3H, s, NHC(CH<sub>3</sub>)), 1.37 (3H, s, NHC(CH<sub>3</sub>)), 1.36 (3H, s, NHC(CH<sub>3</sub>)), 1.02 (3H, d,  $J = 6.7$ , CH(CH<sub>3</sub>)<sub>2</sub>), 1.01 (3H, d,  $J = 6.9$ , CH(CH<sub>3</sub>)<sub>2</sub>), 0.98 (3H, d,  $J = 6.9$ , CH(CH<sub>3</sub>)<sub>2</sub>), 0.95 (3H, d,  $J = 6.7$ , CH(CH<sub>3</sub>)<sub>2</sub>), 0.94-0.90 (6H, m, CH(CH<sub>3</sub>)<sub>2</sub>), 0.82 (3H, d,  $J = 6.8$ , CH(CH<sub>3</sub>)<sub>2</sub>), 0.78 (3H, d,  $J = 6.8$ , CH(CH<sub>3</sub>)<sub>2</sub>);  $\delta_C$  (125 MHz, CDCl<sub>3</sub>) 178.2, 175.9, 175.8, 175.6, 175.2, 173.4, 173.0, 172.8, 172.5 (CONH), 156.5 (CO<sub>2</sub>Bn), 135.8, 128.9, 128.9, 128.7 (Ar), 67.9 (PhCH<sub>2</sub>), 63.6, 63.6, 63.4, 62.5 (NHC(CH<sub>3</sub>)), 57.2, 57.1, 56.8, 56.7 (NHC(CH<sub>3</sub>)<sub>2</sub>), 36.1 (C(CH<sub>2</sub>-CH<sub>2</sub>)), 35.9, 35.9, 35.9, 35.4 (CH(CH<sub>3</sub>)<sub>2</sub>), 27.7, 27.7, 27.4, 27.1 (NHC(CH<sub>3</sub>)<sub>2</sub>), 26.5 (NHCH<sub>3</sub>), 23.2, 22.9, 22.8, 21.2 (NHC(CH<sub>3</sub>)<sub>2</sub>), 18.3, 18.1, 17.9, 17.9 (NHC(CH<sub>3</sub>)), 17.6, 17.5, 17.4, 17.3, 17.3, 17.2, 17.1 (CH(CH<sub>3</sub>)<sub>2</sub>), 16.5, 16.0 (C(CH<sub>2</sub>-CH<sub>2</sub>)), 15.2 (CH(CH<sub>3</sub>)<sub>2</sub>);  $\nu_{max}/cm^{-1}$  3293m (N-H), 2979w (C-H), 1654s

(C=O), 1528m (C-N);  $m/z$  (ESI<sup>+</sup>) 1064.8 ([M+Na]<sup>+</sup>, 100%), HRMS (ESI<sup>+</sup>) found [M+H]<sup>+</sup> 1041.6697 [C<sub>53</sub>H<sub>89</sub>N<sub>10</sub>O<sub>11</sub>]<sup>+</sup> requires 1041.6707; [α]<sub>D</sub><sup>20</sup> = +48.9 (c 1.12; CH<sub>3</sub>OH).

### Cbz-L-αMv<sub>2</sub>-Aib<sub>2</sub>-Ac<sub>3</sub>C-Aib<sub>2</sub>-D-αMv<sub>2</sub>-NHMe – 2b

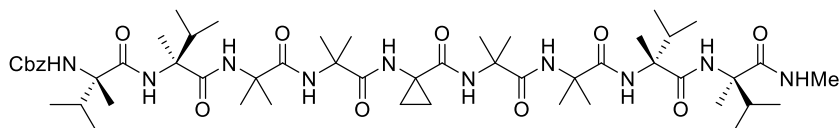

From **S14** (50 mg, 0.09 mmol), EDC.HCl (26 mg, 0.14 mmol), DIPEA (24 μL, 0.14 mmol) and **D-**

**S18** (47 mg, 0.09 mmol) according to **General Procedure F**. Crude **2b** was purified by flash column chromatography (99:1 DCM:MeOH increasing to 19:1) to give the pure product as a white powder (38 mg, 0.04 mmol, 44%).  $R_f$  0.22 (19:1 DCM:MeOH); **m.p.** 243-245 °C;  $\delta_H$  (500 MHz, CDCl<sub>3</sub>) 8.08 (1H, s, CONH), 7.90 (1H, s, CONH), 7.70 (1H, s, CONH), 7.65 (1H, s, CONH), 7.40-7.34 (7H, m, PhH, CONH), 7.12 (1H, s, CONH), 7.11 (1H, s, CONH), 6.42 (1H, s, CONH), 6.42 (1H, s, CONH), 5.39 (1H, s, CONH), 5.18 (1H, d,  $J$  = 12.1, PhCH<sub>2</sub>), 5.03 (1H, d,  $J$  = 12.1, PhCH<sub>2</sub>), 2.80 (3H, d,  $J$  = 4.6, NHCH<sub>3</sub>), 2.36 (1H, m, CH(CH<sub>3</sub>)<sub>2</sub>), 2.09 (1H, sep,  $J$  = 6.8, CH(CH<sub>3</sub>)<sub>2</sub>), 1.89 (1H, sep,  $J$  = 6.8, CH(CH<sub>3</sub>)<sub>2</sub>), 1.79-1.71 (4H, m, C(CH<sub>2</sub>-CH<sub>2</sub>)), 1.58 (1H, m, CH(CH<sub>3</sub>)<sub>2</sub>), 1.54 (3H, s, NHC(CH<sub>3</sub>)<sub>2</sub>), 1.53 (3H, s, NHC(CH<sub>3</sub>)<sub>2</sub>), 1.52 (3H, s, NHC(CH<sub>3</sub>)<sub>2</sub>), 1.51 (3H, s, NHC(CH<sub>3</sub>)<sub>2</sub>), 1.50 (3H, s, NHC(CH<sub>3</sub>)<sub>2</sub>), 1.49 (3H, s, NHC(CH<sub>3</sub>)<sub>2</sub>), 1.47 (3H, s, NHC(CH<sub>3</sub>)<sub>2</sub>), 1.45 (3H, s, NHC(CH<sub>3</sub>)<sub>2</sub>), 1.43 (3H, s, NHC(CH<sub>3</sub>)), 1.42 (3H, s, NHC(CH<sub>3</sub>)), 1.37 (3H, s, NHC(CH<sub>3</sub>)), 1.35 (3H, s, NHC(CH<sub>3</sub>)), 1.00-0.90 (18H, m, CH(CH<sub>3</sub>)<sub>2</sub>), 0.82 (3H, d,  $J$  = 6.8, CH(CH<sub>3</sub>)<sub>2</sub>), 0.78 (3H, d,  $J$  = 6.8, CH(CH<sub>3</sub>)<sub>2</sub>);  $\delta_C$  (100 MHz, CDCl<sub>3</sub>) 177.6, 176.1, 176.0, 175.8, 175.1, 173.4, 172.9, 172.8, 172.6 (CONH), 156.5 (CO<sub>2</sub>Bn), 135.8, 128.9, 128.9, 128.7 (Ar), 67.8 (PhCH<sub>2</sub>), 64.1, 63.6, 63.3, 62.5 (NHC(CH<sub>3</sub>)), 57.3, 57.1, 56.9, 56.8 (NHC(CH<sub>3</sub>)<sub>2</sub>), 36.1, 35.9, 35.8, 35.1 (CH(CH<sub>3</sub>)<sub>2</sub>), 34.1 (C(CH<sub>2</sub>-CH<sub>2</sub>)), 27.2, 26.9 (NHC(CH<sub>3</sub>)<sub>2</sub>), 26.6 (NHCH<sub>3</sub>), 26.0, 25.6, 25.4, 24.8, 23.1, 23.1 (NHC(CH<sub>3</sub>)<sub>2</sub>), 18.4, 18.0, 17.9, 17.7 (NHC(CH<sub>3</sub>)), 17.6, 17.6, 17.5, 17.4, 17.3, 17.43 17.2, 17.2 (CH(CH<sub>3</sub>)<sub>2</sub>), 16.4, 15.9 (C(CH<sub>2</sub>-CH<sub>2</sub>));  $\nu_{max}/cm^{-1}$  3295m (N-H), 2978m (C-H), 1657s (C=O), 1530m (C-N);  $m/z$  (ESI<sup>+</sup>) 1063.8 ([M+Na]<sup>+</sup>, 100%), HRMS (ESI<sup>+</sup>) found [M+NH<sub>4</sub>]<sup>+</sup> 1058.6970 [C<sub>53</sub>H<sub>92</sub>N<sub>11</sub>O<sub>11</sub>]<sup>+</sup> requires 1058.6972; [α]<sub>D</sub><sup>20</sup> = +23.6 (c 1.00; CH<sub>3</sub>OH).

### N<sub>3</sub>-Aib-L/D-αMv-NHMe – S19

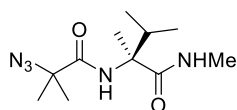

From **S6** (893 mg, 6.92 mmol), oxalyl chloride (0.62 mL, 7.38 mmol), **S3** (664 mg, 4.60 mmol) and Et<sub>3</sub>N (0.97 mL, 6.92 mmol) according to **General Procedure A**. Crude **S19** was purified by flash column chromatography (99:1 DCM:MeOH increasing to 19:1) to give the pure compound as a clear oil (740 mg, 2.90 mmol, 63%).  $R_f$  0.43 (19:1 DCM:MeOH);  $\delta_H$  (500 MHz, CDCl<sub>3</sub>) 7.00 (1H, s, br, CONH), 6.81 (1H, d,  $J$  = 4.8, br, NHCH<sub>3</sub>), 2.74 (3H, d,  $J$  = 4.8, NHCH<sub>3</sub>), 2.44 (1H, sep,  $J$  = 6.9,

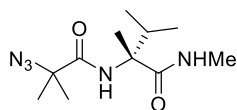

CH(CH<sub>3</sub>)<sub>2</sub>), 1.46 (3H, s, NHC(CH<sub>3</sub>)), 1.45 (3H, s, N<sub>3</sub>C(CH<sub>3</sub>)<sub>2</sub>), 1.42 (3H, s, N<sub>3</sub>C(CH<sub>3</sub>)<sub>2</sub>), 0.85 (3H, d, *J* = 6.9, CH(CH<sub>3</sub>)<sub>2</sub>), 0.81 (3H, d, *J* = 6.9, CH(CH<sub>3</sub>)<sub>2</sub>);  $\delta_c$  (125 MHz, CDCl<sub>3</sub>) 173.8 (CONH), 172.3 (CONH), 64.6 (N<sub>3</sub>C(CH<sub>3</sub>)<sub>2</sub>), 63.9 (NHC(CH<sub>3</sub>)), 33.4 (CH(CH<sub>3</sub>)<sub>2</sub>), 26.5 (NHCH<sub>3</sub>), 24.4 (N<sub>3</sub>C(CH<sub>3</sub>)<sub>2</sub>), 24.3 (N<sub>3</sub>C(CH<sub>3</sub>)<sub>2</sub>), 17.9 (NHC(CH<sub>3</sub>)), 17.2 (CH(CH<sub>3</sub>)<sub>2</sub>), 17.1 (CH(CH<sub>3</sub>)<sub>2</sub>);  $\nu_{max}/cm^{-1}$  3350m.br (N-H), 2971m (C-H), 2111s (N<sub>3</sub>), 1651s (C=O), 1507m (C-N); *m/z* (ESI<sup>+</sup>) 278.2 ([M+Na]<sup>+</sup>, 95%), 533.4 ([2M+Na]<sup>+</sup>, 100%), HRMS (ESI<sup>+</sup>) found [M+Na]<sup>+</sup> 278.1579 [C<sub>11</sub>H<sub>21</sub>N<sub>5</sub>O<sub>2</sub>Na]<sup>+</sup> requires 278.1587; (L) [ $\alpha$ ]<sub>D</sub><sup>20</sup> = +20.6 (c 0.99, CH<sub>3</sub>OH), (D) [ $\alpha$ ]<sub>D</sub><sup>20</sup> = -20.4 (c 1.10; CH<sub>3</sub>OH).

### H-Aib-L/D- $\alpha$ Mv-NHMe – S20

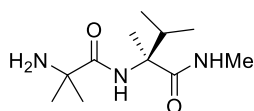

From **S19** (420 mg, 1.64 mmol) according to **General Procedure B. S20** obtained as a white powder (376 mg, *quant.*). *R<sub>f</sub>* 0.00 (EtOAc); *m.p.* 99-101 °C;  $\delta_H$  (500 MHz, CD<sub>3</sub>OD) 2.76 (3H, d, *J* = 4.8, NHCH<sub>3</sub>), 2.16 (1H, sep, *J* = 6.8, CH(CH<sub>3</sub>)<sub>2</sub>), 1.48 (3H, s, NHC(CH<sub>3</sub>)), 1.40 (3H, s, H<sub>2</sub>NC(CH<sub>3</sub>)<sub>2</sub>), 1.37 (3H, s, H<sub>2</sub>NC(CH<sub>3</sub>)<sub>2</sub>), 1.02 (3H, d, *J* = 6.8, CH(CH<sub>3</sub>)<sub>2</sub>), 0.95 (3H, d, *J* = 6.8, CH(CH<sub>3</sub>)<sub>2</sub>);  $\delta_c$  (125 MHz, CD<sub>3</sub>OD) 178.4 (CONHCH<sub>3</sub>), 176.2 (CONH), 63.9 (NHC(CH<sub>3</sub>)), 56.4 (H<sub>2</sub>NC(CH<sub>3</sub>)<sub>2</sub>), 36.4 (CH(CH<sub>3</sub>)<sub>2</sub>), 27.9 (NHC(CH<sub>3</sub>)), 27.7 (H<sub>2</sub>NC(CH<sub>3</sub>)<sub>2</sub>), 26.6 (NHCH<sub>3</sub>), 17.6 (NHC(CH<sub>3</sub>)), 17.5 (CH(CH<sub>3</sub>)<sub>2</sub>), 17.4 (CH(CH<sub>3</sub>)<sub>2</sub>);  $\nu_{max}/cm^{-1}$  3308m.br (N-H), 2966m (C-H), 2467m (C-H), 1641s (C=O), 1510m (C-N), 1456m (C-N); *m/z* (ESI<sup>+</sup>) 230.2 ([M+H]<sup>+</sup>, 100%), HRMS (ESI<sup>+</sup>) found [M+H]<sup>+</sup> 230.1858 [C<sub>11</sub>H<sub>24</sub>N<sub>3</sub>O<sub>2</sub>]<sup>+</sup> requires 230.1863; (L) [ $\alpha$ ]<sub>D</sub><sup>20</sup> = +2.0 (c 0.99, CH<sub>3</sub>OH), (D) [ $\alpha$ ]<sub>D</sub><sup>20</sup> = -2.0 (c 1.00; CH<sub>3</sub>OH).

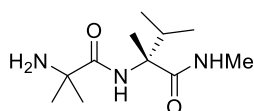

### N<sub>3</sub>-Aib<sub>4</sub>-OH – S21

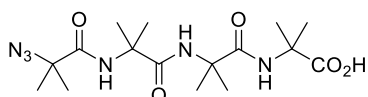

Prepared as previously reported.<sup>5</sup>

### N<sub>3</sub>-Aib<sub>5</sub>-D- $\alpha$ Mv-NHMe – S22

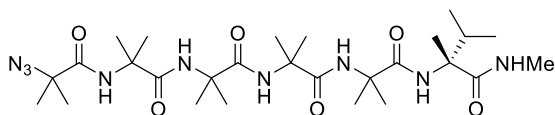

From **S21** (150 mg, 0.39 mmol), EDC.HCl (113 mg, 0.59 mmol), Et<sub>3</sub>N (62  $\mu$ L, 0.59 mmol) and **D-S20** (138 mg, 0.59 mmol) according to **General Procedure F**. Crude

**S22** was purified by flash column chromatography (99:1 DCM:MeOH increasing to 19:1) to give the pure compound as a white powder (43 mg, 0.07 mmol, 19%). *R<sub>f</sub>* 0.12 (19:1 DCM:MeOH); *m.p.* 249-251 °C;  $\delta_H$  (400 MHz, CDCl<sub>3</sub>) 7.60 (1H, s, CONH), 7.48 (1H, s, CONH), 7.34 (1H, d, *J* = 4.4, NHCH<sub>3</sub>), 6.98 (1H, s,

CONH), 6.90 (1H, s, CONH), 6.23 (1H, s, CONH), 2.80 (3H, d,  $J = 4.4$ , NHCH<sub>3</sub>), 2.15 (1H, sep,  $J = 6.8$ , CH(CH<sub>3</sub>)<sub>2</sub>), 1.56 (3H, s, NHC(CH<sub>3</sub>)<sub>2</sub>), 1.54 (3H, s, NHC(CH<sub>3</sub>)<sub>2</sub>), 1.50 (3H, s, NHC(CH<sub>3</sub>)<sub>2</sub>), 1.49 (6H, s, NHC(CH<sub>3</sub>)<sub>2</sub>), 1.48 (3H, s, NHC(CH<sub>3</sub>)<sub>2</sub>), 1.47 (3H, s, NHC(CH<sub>3</sub>)<sub>2</sub>), 1.46 (3H, s, NHC(CH<sub>3</sub>)<sub>2</sub>), 1.45 (6H, s, NHC(CH<sub>3</sub>)<sub>2</sub>), 1.38 (3H, s, NHC(CH<sub>3</sub>)), 0.99 (3H, d,  $J = 6.8$ , CH(CH<sub>3</sub>)<sub>2</sub>), 0.96 (3H, d,  $J = 6.8$ , CH(CH<sub>3</sub>)<sub>2</sub>);  $\delta_c$  (100 MHz, CDCl<sub>3</sub>) 175.4 (CONH), 175.4 (CONH), 174.4 (CONH), 173.5 (CONH), 173.3 (CONH), 173.3 (CONH), 64.1 (N<sub>3</sub>C(CH<sub>3</sub>)<sub>2</sub>), 63.4 (NHC(CH<sub>3</sub>)), 57.2 (NHC(CH<sub>3</sub>)<sub>2</sub>), 57.0 (NHC(CH<sub>3</sub>)<sub>2</sub>), 57.0 (NHC(CH<sub>3</sub>)<sub>2</sub>), 56.9 (NHC(CH<sub>3</sub>)<sub>2</sub>), 35.8 (CH(CH<sub>3</sub>)<sub>2</sub>), 27.3 (N<sub>3</sub>C(CH<sub>3</sub>)<sub>2</sub>), 27.2 (N<sub>3</sub>C(CH<sub>3</sub>)<sub>2</sub>), 26.5 (NHC(CH<sub>3</sub>)<sub>2</sub>, NHCH<sub>3</sub>), 26.1 (NHC(CH<sub>3</sub>)<sub>2</sub>), 24.5 (NHC(CH<sub>3</sub>)<sub>2</sub>), 24.4 (NHC(CH<sub>3</sub>)<sub>2</sub>), 23.8 (NHC(CH<sub>3</sub>)<sub>2</sub>), 23.6 (NHC(CH<sub>3</sub>)<sub>2</sub>), 23.5 (NHC(CH<sub>3</sub>)<sub>2</sub>, NHC(CH<sub>3</sub>)), 17.8 (CH(CH<sub>3</sub>)<sub>2</sub>), 17.3 (CH(CH<sub>3</sub>)<sub>2</sub>);  $\nu_{\max}/\text{cm}^{-1}$  3322m.br (N-H), 2975w (C-H), 2112m (N<sub>3</sub>), 1655s (C=O), 1522m (C-N);  $m/z$  (ESI<sup>+</sup>) 596.5 ([M+H]<sup>+</sup>, 100%), HRMS (ESI<sup>+</sup>) found [M+Na]<sup>+</sup> 618.3704 [C<sub>27</sub>H<sub>49</sub>N<sub>9</sub>O<sub>6</sub>Na]<sup>+</sup> requires 618.3704;  $[\alpha]_D^{20} = -25.2$  ( $c$  1.00; CH<sub>3</sub>OH).

### H-Aib<sub>5</sub>-D- $\alpha$ Mv-NHMe – S23

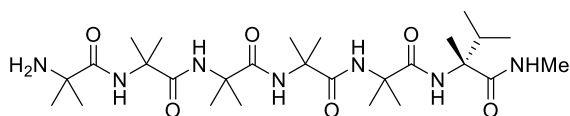

From **S22** (40 mg, 0.07 mmol) according to **General Procedure B. S23** was obtained as a white powder (37 mg, 0.07 mmol, *quant.*).  $R_f$  0.29 (19:1 DCM:MeOH);

**m.p.** 210-212 °C;  $\delta_H$  (400 MHz, CDCl<sub>3</sub>) 8.29 (2H, s, NH<sub>2</sub>), 7.77 (1H, m, CONH), 7.69 (1H, m, CONH), 7.35 (1H, m, CONH), 6.99 (1H, m, CONH), 6.90 (1H, s, br, CONH), 6.59 (1H, s, br, CONH), 2.78 (3H, d,  $J = 4.5$ , NHCH<sub>3</sub>), 2.14 (1H, m,  $J = 6.8$ , CH(CH<sub>3</sub>)<sub>2</sub>), 1.56-1.31 (33H, m, NHC(CH<sub>3</sub>)<sub>2</sub>, NHC(CH<sub>3</sub>)), 0.98 (3H, d,  $J = 6.8$ , CH(CH<sub>3</sub>)<sub>2</sub>), 0.92 (3H, d,  $J = 6.4$ , CH(CH<sub>3</sub>)<sub>2</sub>);  $\delta_c$  (100 MHz, CDCl<sub>3</sub>) 178.8 (CONHCH<sub>3</sub>), 175.9 (CONH), 175.7 (CONH), 174.7 (CONH), 174.3 (CONH), 173.9 (CONH), 63.2 (NHC(CH<sub>3</sub>)), 57.1 (NHC(CH<sub>3</sub>)<sub>2</sub>), 56.8 (NHC(CH<sub>3</sub>)<sub>2</sub>), 56.7 (NHC(CH<sub>3</sub>)<sub>2</sub>), 56.3 (NHC(CH<sub>3</sub>)<sub>2</sub>), 54.8 (H<sub>2</sub>NC(CH<sub>3</sub>)<sub>2</sub>), 35.8 (CH(CH<sub>3</sub>)<sub>2</sub>), 29.0 (H<sub>2</sub>NC(CH<sub>3</sub>)<sub>2</sub>), 28.9 (H<sub>2</sub>NC(CH<sub>3</sub>)<sub>2</sub>), 27.4 (NHC(CH<sub>3</sub>)<sub>2</sub>), 26.9 (NHC(CH<sub>3</sub>)<sub>2</sub>), 26.6 (NHC(CH<sub>3</sub>)<sub>2</sub>, NHCH<sub>3</sub>), 26.4 (NHC(CH<sub>3</sub>)<sub>2</sub>), 23.5 (NHC(CH<sub>3</sub>)<sub>2</sub>), 23.4 (NHC(CH<sub>3</sub>)<sub>2</sub>), 23.3 (NHC(CH<sub>3</sub>)<sub>2</sub>, NHC(CH<sub>3</sub>)), 17.9 (CH(CH<sub>3</sub>)<sub>2</sub>), 17.4 (CH(CH<sub>3</sub>)<sub>2</sub>);  $\nu_{\max}/\text{cm}^{-1}$  3308m (N-H), 2980m (C-H), 1757s (C=O), 1527m (C-N);  $m/z$  (ESI<sup>+</sup>) 570.5 ([M+H]<sup>+</sup>, 100%), HRMS (ESI<sup>+</sup>) found [M+Na]<sup>+</sup> 592.3798 [C<sub>27</sub>H<sub>51</sub>N<sub>7</sub>O<sub>6</sub>Na]<sup>+</sup> requires 592.3799;  $[\alpha]_D^{20} = -12.8$  ( $c = 1.00$ ; CH<sub>3</sub>OH).

### H-Bip-O<sup>t</sup>Bu – S24

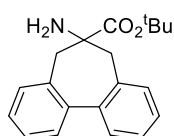

From Cbz-Bip-O<sup>t</sup>Bu (428 mg, 0.96 mmol) according to **General Procedure B. S24** was obtained as a pale yellow powder (292 mg, 0.94 mmol, 98%).  $\delta_H$  (400 MHz, CDCl<sub>3</sub>) 7.45-7.27 (8H, m, ArH), 3.02 (2H, d,  $J = 13.5$ , ArCH<sub>2</sub>), 2.56-2.41 (2H, m, ArCH<sub>2</sub>), 1.46 (9H, s, C(CH<sub>3</sub>)<sub>3</sub>);  $\delta_c$  (100 MHz, CDCl<sub>3</sub>) 174.2 (CO<sub>2</sub>), 140.7, 130.3, 128.5, 127.6 (Ar), 82.0 (C(CH<sub>3</sub>)<sub>3</sub>), 68.6 (ArCH<sub>2</sub>C), 42.6 (ArCH<sub>2</sub>), 28.1 (C(CH<sub>3</sub>)<sub>3</sub>). Data are in accordance with literature values.<sup>6</sup>

### N<sub>3</sub>-Aib-Bip-O<sup>t</sup>Bu – S25

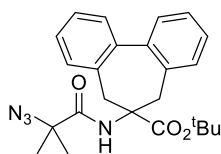

From **S6** (77 mg, 0.60 mmol), oxalyl chloride (54  $\mu$ L, 0.64 mmol), **S24** (100 mg, 0.40 mmol) and Et<sub>3</sub>N (170  $\mu$ L, 1.20 mmol) according to **General Procedure A**.

Crude **S25** was purified by flash column chromatography (9:1 PE:EtOAc) obtained as a glassy solid (115 mg, 0.27 mmol, 68%). **R<sub>f</sub>** 0.57 (4:1 PE:EtOAc); **m.p.** 131-133 °C;  $\delta_{\text{H}}$  (400 MHz, CDCl<sub>3</sub>) 7.46-7.37 (4H, m, ArH), 7.32 (2H, q, *J* = 7.1, ArH), 7.20 (2H, d, *J* = 7.1, ArH), 6.72 (1H, s, CONH), 3.33-2.29 (2H, m, ArCH<sub>2</sub>), 3.15 (2H, d, *J* = 11.3, ArCH<sub>2</sub>), 1.56 (6H, s, NHC(CH<sub>3</sub>)<sub>2</sub>), 1.47 (9H, s, C(CH<sub>3</sub>)<sub>3</sub>);  $\delta_{\text{C}}$  (100 MHz, CDCl<sub>3</sub>) 171.5 (CO<sub>2</sub>) 170.5 (CONH), 140.8, 135.2, 130.0, 128.4, 127.9, 127.8 (Ar), 81.6 (C(CH<sub>3</sub>)<sub>3</sub>), 69.1 (ArCH<sub>2</sub>C), 64.5 (N<sub>3</sub>C(CH<sub>3</sub>)<sub>2</sub>), 40.1 (ArCH<sub>2</sub>), 28.0 (C(CH<sub>3</sub>)<sub>3</sub>), 24.5 (N<sub>3</sub>C(CH<sub>3</sub>)<sub>2</sub>);  $\nu_{\text{max}}/\text{cm}^{-1}$  3411w (N-H), 2978m (C-H), 2111s (N<sub>3</sub>) 1736s (C=O), 1505s (C-N); **m/z** (ESI<sup>+</sup>) 421.3 ([M+H]<sup>+</sup>, 100%), 443.3 ([M+Na]<sup>+</sup>, 50%), HRMS (ESI<sup>+</sup>) found [M+Na]<sup>+</sup> 443.2070 [C<sub>24</sub>H<sub>28</sub>N<sub>4</sub>O<sub>3</sub>Na]<sup>+</sup> requires 443.2059.

### N<sub>3</sub>-Aib-Bip-OH – S26

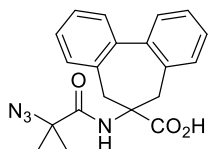

From **S25** (115 mg, 0.27 mmol) according to **General Procedure D**. Crude **S26** was purified by flash column chromatography (97:3 DCM:MeOH increasing to 19:1) to give the pure product as a clear oil (87 mg, 0.24 mmol, 89%). **R<sub>f</sub>** 0.27 (19:1 DCM:MeOH);

$\delta_{\text{H}}$  (500 MHz, CDCl<sub>3</sub>) 9.34 (1H, s, br, CO<sub>2</sub>H), 7.47-7.41 (4H, m, ArH), 7.34 (2H, dd, *J* = 6.0, ArH), 7.30-7.23 (2H, m, ArH), 6.89 (1H, s, CONH), 3.46-2.29 (2H, m, ArCH<sub>2</sub>), 3.34-3.12 (2H, m, ArCH<sub>2</sub>), 1.57 (6H, s, NHC(CH<sub>3</sub>)<sub>2</sub>);  $\delta_{\text{C}}$  (125 MHz, CDCl<sub>3</sub>) 176.5 (CO<sub>2</sub>H) 172.6 (CONH), 140.7, 134.6, 130.0, 128.5, 128.1, 127.9 (Ar), 68.8 (ArCH<sub>2</sub>C), 64.3 (N<sub>3</sub>C(CH<sub>3</sub>)<sub>2</sub>), 38.9 (ArCH<sub>2</sub>), 24.4 (N<sub>3</sub>C(CH<sub>3</sub>)<sub>2</sub>);  $\nu_{\text{max}}/\text{cm}^{-1}$  2978s.br (O-H, N-H, C-H), 2112s (N<sub>3</sub>) 1715m (C=O), 1680m (C=O), 1509m (C-N); **m/z** (ESI<sup>-</sup>) 365.2 ([M+H]<sup>+</sup>, 100%), HRMS (ESI<sup>+</sup>) found [M+Na]<sup>+</sup> 387.1442 [C<sub>20</sub>H<sub>20</sub>N<sub>4</sub>O<sub>3</sub>Na]<sup>+</sup> requires 387.1433.

### N<sub>3</sub>-Aib-Bip-Aib<sub>5</sub>-D- $\alpha$ Mv-NHMe – S27

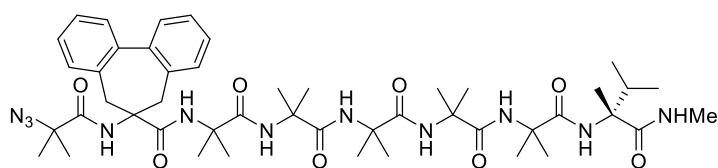

From **S26** (46 mg, 0.13 mmol), EDC.HCl (36 mg, 0.19 mmol), Et<sub>3</sub>N (34  $\mu$ L, 0.19 mmol) and **S23** (38 mg, 0.07 mmol) according to **General Procedure F**. Crude **S27** was

purified by flash column chromatography (99:1 DCM:MeOH increasing to 19:1) to give the pure compound



as a clear film (36 mg, 0.04 mmol, 57%).  $R_f$  0.27 (19:1 DCM:MeOH); **m.p.** 230-231 °C;  $\delta_H$  (400 MHz, CDCl<sub>3</sub>) 7.77 (1H, s, CONH), 7.73 (1H, s, CONH), 7.59 (1H, s, CONH), 7.51-7.30 (8H, m, ArH), 7.23-7.12 (3H, m, CONH), 7.02 (1H, s, CONH), 6.82 (1H, s, CONH), 3.33 (1H, m, ArCH<sub>2</sub>), 3.08 (1H, d,  $J = 12.0$ , ArCH<sub>2</sub>), 2.96-2.25 (2H, m, ArCH<sub>2</sub>), 2.77 (3H, d,  $J = 4.5$ , NHCH<sub>3</sub>), 2.13 (1H, m, CH(CH<sub>3</sub>)<sub>2</sub>), 1.60 (6H, s, NHC(CH<sub>3</sub>)<sub>2</sub>), 1.51 (3H, s, NHC(CH<sub>3</sub>)<sub>2</sub>), 1.48 (12H, s, NHC(CH<sub>3</sub>)<sub>2</sub>), 1.47 (3H, s, NHC(CH<sub>3</sub>)<sub>2</sub>), 1.46 (3H, s, NHC(CH<sub>3</sub>)<sub>2</sub>), 1.45-1.39 (9H, m, NHC(CH<sub>3</sub>)<sub>2</sub>), NHC(CH<sub>3</sub>), N<sub>3</sub>C(CH<sub>3</sub>)<sub>2</sub>), 1.39-1.28 (N<sub>3</sub>C(CH<sub>3</sub>)<sub>2</sub>), 0.99 (3H, d,  $J = 6.6$ , CH(CH<sub>3</sub>)<sub>2</sub>), 0.93 (3H, d,  $J = 6.6$ , CH(CH<sub>3</sub>)<sub>2</sub>);  $\delta_C$  (100 MHz, CDCl<sub>3</sub>) 176.1 (CONH), 175.7 (CONH), 175.5 (CONH), 175.2 (CONH), 174.8 (CONH), 174.4 (CONH), 173.5 (CONH), 171.9 (CONH), 140.7, 140.5, 135.0, 133.4, 130.2, 130.1, 129.4, 128.7, 128.6, 128.5, 128.1, 128.0 (Ar), 69.5 (ArCH<sub>2</sub>C), 64.1 (N<sub>3</sub>C(CH<sub>3</sub>)<sub>2</sub>), 63.2 (NHC(CH<sub>3</sub>)), 57.1 (NHC(CH<sub>3</sub>)<sub>2</sub>), 57.1 (NHC(CH<sub>3</sub>)<sub>2</sub>), 56.9 (NHC(CH<sub>3</sub>)<sub>2</sub>), 56.8 (NHC(CH<sub>3</sub>)<sub>2</sub>), 56.7 (NHC(CH<sub>3</sub>)<sub>2</sub>), 35.8 (ArCH<sub>2</sub>), 29.8 (CH(CH<sub>3</sub>)<sub>2</sub>), 27.5-26.4 (N<sub>3</sub>C(CH<sub>3</sub>)<sub>2</sub>, NHC(CH<sub>3</sub>)<sub>2</sub>, NHCH<sub>3</sub>), 24.7-24.3 (NHC(CH<sub>3</sub>)<sub>2</sub>), 23.7-22.9 (NHC(CH<sub>3</sub>)<sub>2</sub>, NHC(CH<sub>3</sub>)), 17.9 (CH(CH<sub>3</sub>)<sub>2</sub>), 17.4 (CH(CH<sub>3</sub>)<sub>2</sub>);  $\nu_{max}/cm^{-1}$  3305m (N-H), 2982w (C-H), 2114m (N<sub>3</sub>), 1656m (C=O), 1526m (C-N);  $m/z$  (ESI<sup>+</sup>) 1159.8 ([M+H]<sup>+</sup>, 100%), HRMS (ESI<sup>+</sup>) found [M+Na]<sup>+</sup> 938.5182 [C<sub>47</sub>H<sub>69</sub>N<sub>11</sub>O<sub>8</sub>Na]<sup>+</sup> requires 938.5228;  $[\alpha]_D^{20} = -49.6$  (c 1.00; CH<sub>3</sub>OH).

#### H-Aib-Bip-Aib<sub>5</sub>-D- $\alpha$ Mv-NHMe – S28

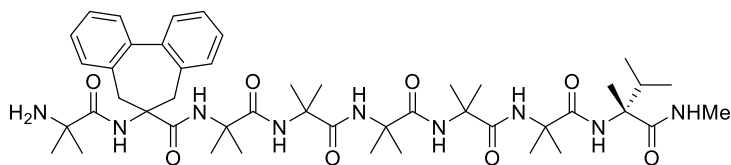

From **S27** (36 mg, 0.04 mmol) according to **General Procedure B. S28** was obtained as a clear film (21 mg, 0.02 mmol, 58%).  $R_f$  0.17 (19:1 DCM:MeOH);  $\delta_H$  (500 MHz,

CDCl<sub>3</sub>) 8.54 (2H, s, br, NH<sub>2</sub>), 7.86-6.93 (14H, m, ArH, CONH), 6.83 (1H, s, br, CONH), 6.34 (1H, s, br, CONH), 3.74-2.95 (2H, m, ArCH<sub>2</sub>), 2.79 (3H, d,  $J = 4.5$ , NHCH<sub>3</sub>), 2.21-2.09 (3H, m, ArCH<sub>2</sub>, CHCH<sub>3</sub>)<sub>2</sub>), 1.64-1.20 (36H, s, NHC(CH<sub>3</sub>)<sub>2</sub>, NHC(CH<sub>3</sub>)), 0.99 (3H, d,  $J = 6.5$ , CH(CH<sub>3</sub>)<sub>2</sub>), 0.93 (3H, d,  $J = 6.2$ , CH(CH<sub>3</sub>)<sub>2</sub>);  $\delta_C$  (125 MHz, CDCl<sub>3</sub>) 179.2 (CONH), 176.2 (CONH), 175.8 (CONH), 175.7 (CONH), 175.4 (CONH), 174.9 (CONH), 174.7 (CONH), 174.7 (CONH), 140.5, 135.7, 133.8, 130.2, 129.5, 128.6, 128.5, 128.4, 128.3, 127.9 (Ar), 69.1 (ArCH<sub>2</sub>C), 63.2 (NHC(CH<sub>3</sub>)), 57.4 (NHC(CH<sub>3</sub>)<sub>2</sub>), 57.1 (NHC(CH<sub>3</sub>)<sub>2</sub>), 56.9 (NHC(CH<sub>3</sub>)<sub>2</sub>), 56.8 (NHC(CH<sub>3</sub>)<sub>2</sub>), 56.6 (NHC(CH<sub>3</sub>)<sub>2</sub>), 55.0 (H<sub>2</sub>NC(CH<sub>3</sub>)<sub>2</sub>), 35.9 (ArCH<sub>2</sub>), 29.8 (CH(CH<sub>3</sub>)<sub>2</sub>), 29.1 (H<sub>2</sub>NC(CH<sub>3</sub>)<sub>2</sub>), 27.7-26.3 (H<sub>2</sub>NC(CH<sub>3</sub>)<sub>2</sub>, NHC(CH<sub>3</sub>)<sub>2</sub>, NHCH<sub>3</sub>), 23.7-22.7 (NHC(CH<sub>3</sub>)<sub>2</sub>, NHC(CH<sub>3</sub>)), 17.9 (CH(CH<sub>3</sub>)<sub>2</sub>), 17.4 (CH(CH<sub>3</sub>)<sub>2</sub>);  $\nu_{max}/cm^{-1}$  3328m.br (N-H), 2971m (C-H), 1667s (C=O), 1512m (C-N);  $m/z$  (ESI<sup>+</sup>) 891.5 ([M+H]<sup>+</sup>, 100%), HRMS (ESI<sup>+</sup>) found [M+Na]<sup>+</sup> 912.5279 [C<sub>47</sub>H<sub>71</sub>N<sub>9</sub>O<sub>8</sub>]<sup>+</sup> requires 912.5323;  $[\alpha]_D^{20} = -74.0$  (c 1.00; CH<sub>3</sub>OH).

#### Cbz-L- $\alpha$ Mv-Aib-Bip-Aib<sub>5</sub>-D- $\alpha$ Mv-NHMe – 4a

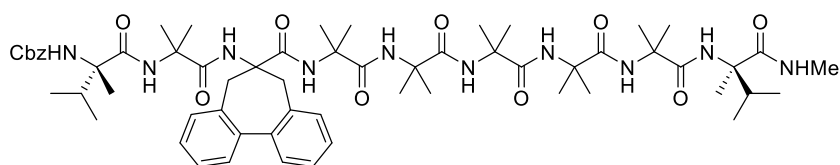

From **L-SI** (12 mg, 0.05 mmol), TFFH (18 mg, 0.07 mmol), pyridine (4  $\mu$ L, 3.04 mmol), **S28** (21 mg, 0.02 mmol) and DIPEA (4 L.  $\mu$ L,

0.02 mmol) according to **General Procedure C**. Crude **4a** was purified by flash column chromatography (99:1 DCM:MeOH increasing to 19:1) to give the pure product (16 mg, 0.01 mmol, 62%).  $R_f$  0.30 (19:1 DCM:MeOH); **m.p.** >250  $^{\circ}$ C;  $\delta_H$  (400 MHz,  $CDCl_3$ ) 7.80-6.96 (21H, m, ArH, CONH), 6.52 (1H, s, CONH), 5.43 (1H, s, CONH) 5.22-4.58 (2H, m,  $PhCH_2$ ), 3.34-1.89 (9H, m,  $ArCH_2$ ,  $NHCH_3$ ,  $CH(CH_3)_2$ ), 1.63-1.08 (42H, m,  $NHC(CH_3)_2$ ,  $NHC(CH_3)$ ), 1.05-0.76 (12H, m,  $CH(CH_3)_2$ );  $\delta_C$  (125 MHz,  $CD_2Cl_2/CD_3OD$ ) 177.3 (CONH), 177.3 (CONH), 176.8 (CONH), 176.7 (CONH), 176.7 (CONH), 176.4 (CONH), 176.1 (CONH), 176.0 (CONH), 176.0 (CONH), 157.0 ( $CO_2Bn$ ), 141.4, 136.8, 130.5, 129.1, 128.8, 128.6, 128.6, 128.4, 128.2, 128.0 (Ar), 70.4 ( $ArCH_2C$ ), 67.4 ( $PhCH_2$ ), 63.7 ( $NHC(CH_3)$ ), 57.7-57.1 ( $NHC(CH_3)_2$ ), 36.5-35.1 ( $ArCH_2$ ), 32.5 ( $NHC(CH_3)$ ), 30.4-22.8 ( $NHCH_3$ ,  $NHC(CH_3)_2$ ,  $NHC(CH_3)$ ), 18.1-17.2 ( $CH(CH_3)_2$ );  $\nu_{max}/cm^{-1}$  3303w (N-H), 2927w (C-H), 1653s (C=O), 1521m (C-N);  $m/z$  (ESI $^+$ ) 1159.7 ([ $M+Na$ ] $^+$ , 100%), HRMS (ESI $^+$ ) found [ $M+Na$ ] $^+$  1159.6530 [ $C_{61}H_{88}N_{10}O_{11}Na$ ] $^+$  requires 1159.6526;  $[\alpha]_D^{20} = -5.00$  (c 0.10;  $CH_3OH$ ).

### Cbz-L- $\alpha$ Mv-Aib $_3$ -O $^t$ Bu – S29

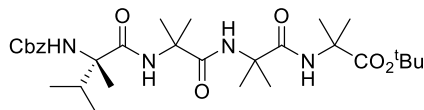

Prepared as previously reported.<sup>7</sup>

### Cbz-L- $\alpha$ Mv-Aib $_3$ -OH – S30

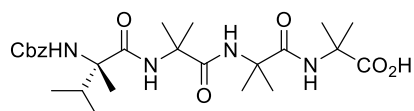

From **S29** (745 mg, 1.29 mmol) according to **General Procedure D**.

Crude **S30** was purified by flash column chromatography (99:1 DCM:MeOH increasing to 19:1) to give the pure product as white powder (593 mg, 1.14 mmol, 88%).  $R_f$  0.32 (19:1 DCM:MeOH); **m.p.** 176-178  $^{\circ}$ C;  $\delta_H$  (500 MHz,  $CDCl_3$ ) 7.57 (2H, s, CONH), 7.41-7.30 (5H, m,  $PhH$ ), 6.41 (1H, s, br, CONH), 5.39 (1H, s, br, CONH), 5.18 (1H, d,  $J = 12.2$ ,  $PhCH_2$ ), 5.03 (1H, d,  $J = 12.2$ ,  $PhCH_2$ ), 1.94 (1H, m,  $CH(CH_3)_2$ ), 1.60 (3H, s,  $NHC(CH_3)_2$ ), 1.55 (3H, s,  $NHC(CH_3)_2$ ), 1.46 (3H, s,  $NHC(CH_3)_2$ ), 1.43 (6H, s,  $NHC(CH_3)_2$ ), 1.39 (3H, s,  $NHC(CH_3)_2$ ), 1.39 (3H, s,  $NHC(CH_3)$ ), 0.97 (3H, d,  $J = 5.8$ ,  $CH(CH_3)_2$ ), 0.93 (3H, d,  $J = 6.0$ ,  $CH(CH_3)_2$ );  $\delta_C$  (100 MHz,  $CDCl_3$ ) 176.0 ( $CO_2H$ ), 175.9 (CONH), 174.5 (CONH), 173.0 (CONH), 156.2 ( $CO_2Bn$ ), 136.2, 128.9, 128.8, 128.3 (Ar), 67.6 ( $NHC(CH_3)$ ), 63.1 ( $PhCH_2$ ), 57.8 ( $NHC(CH_3)_2$ ), 57.0 ( $NHC(CH_3)_2$ ), 56.8 ( $NHC(CH_3)_2$ ), 35.6 ( $CH(CH_3)_2$ ), 26.8 ( $NHC(CH_3)_2$ ), 26.8 ( $NHC(CH_3)_2$ ), 25.8 ( $NHC(CH_3)_2$ ), 24.7 ( $NHC(CH_3)_2$ ), 23.6 ( $NHC(CH_3)_2$ ), 23.4 ( $NHC(CH_3)_2$ ,  $NHC(CH_3)$ ), 17.4 ( $CH(CH_3)_2$ ), 17.3 ( $CH(CH_3)_2$ );  $\nu_{max}/cm^{-1}$  3306m.br

(O-H, N-H), 2981m (C-H), 1660s (C=O), 1524m (C-N);  $m/z$  (ESI<sup>+</sup>) 521.3 ([M+H]<sup>+</sup>, 100%), HRMS (ESI<sup>+</sup>) found [M+Na]<sup>+</sup> 543.2795 [C<sub>26</sub>H<sub>40</sub>N<sub>4</sub>O<sub>7</sub>Na]<sup>+</sup> requires 543.2795;  $[\alpha]_D^{20} = +21.2$  (c 1.00; CH<sub>3</sub>OH).

### Cbz-L- $\alpha$ Mv-Aib<sub>3</sub>-Bip-O<sup>t</sup>Bu – S31

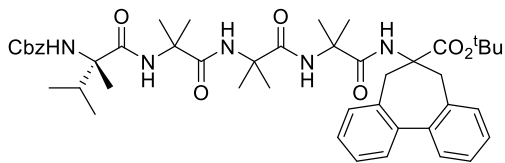

From **S30** (505 mg, 0.97 mmol), EDC.HCl (278 mg, 1.46 mmol), Et<sub>3</sub>N (0.26 mL, 1.46 mmol) and **S24** (300 mg, 0.97 mmol) according to **General Procedure F**. Crude **S31** was purified by flash column chromatography (99:1

DCM:MeOH increasing to 19:1) to give the pure product as an off white powder.  $R_f$  0.43 (19:1 DCM:MeOH); **m.p.** 150-151 °C;  $\delta_H$  (400 MHz, CDCl<sub>3</sub>) 7.66-7.08 (17H, m, NH, ArH), 6.13 (1H, d,  $J = 9.6$ , CONH), 5.22 (1H, d,  $J = 9.7$ , CONH), 5.15 (1H, d,  $J = 12.1$ , PhCH<sub>2</sub>), 4.99 (1H, d,  $J = 12.1$ , PhCH<sub>2</sub>), 3.20-2.79 (4H, m, ArCH<sub>2</sub>), 1.89 (1H, sep,  $J = 6.7$ , CH(CH<sub>3</sub>)<sub>2</sub>), 1.75-1.18 (30H, m, NHC(CH<sub>3</sub>)<sub>2</sub>, NHC(CH<sub>3</sub>), C(CH<sub>3</sub>)<sub>3</sub>), 0.97 (3H, d,  $J = 6.4$ , CH(CH<sub>3</sub>)<sub>2</sub>), 0.95-0.89 (3H, m, CH(CH<sub>3</sub>)<sub>2</sub>);  $\delta_C$  (100 MHz, CDCl<sub>3</sub>) 174.4 (CO-NH), 173.6 (CONH), 173.5 (CONH), 172.4 (CONH), 171.6 (CO<sub>2</sub>C(CH<sub>3</sub>)<sub>3</sub>), 156.0 (CO<sub>2</sub>Bn), 141.3, 140.9, 136.1, 135.5, 135.4, 130.8, 129.6, 129.5, 128.8, 128.7, 128.3, 127.9, 127.7, 127.5, 127.4, 127.2, 127.1, 126.4 (Ar), 80.6 (C(CH<sub>3</sub>)<sub>3</sub>)<sub>a</sub>, 80.3 (C(CH<sub>3</sub>)<sub>3</sub>)<sub>b</sub>, 69.7 (ArCH<sub>2</sub>C)<sub>a</sub>, 69.4 (ArCH<sub>2</sub>C)<sub>b</sub>, 67.4 (NHC(CH<sub>3</sub>)), 63.0 (PhCH<sub>2</sub>), 57.0 (NHC(CH<sub>3</sub>)<sub>2</sub>), 56.9 (NHC(CH<sub>3</sub>)<sub>2</sub>), 56.7 (NHC(CH<sub>3</sub>)<sub>2</sub>), 40.6 (ArCH<sub>2</sub>), 36.6 (ArCH<sub>2</sub>), 35.5 (CH(CH<sub>3</sub>)<sub>2</sub>), 29.0 (C(CH<sub>3</sub>)<sub>3</sub>), 27.6 (NHC(CH<sub>3</sub>)<sub>2</sub>), 26.9 (NHC(CH<sub>3</sub>)<sub>2</sub>), 26.6 (NHC(CH<sub>3</sub>)<sub>2</sub>), 23.7 (NHC(CH<sub>3</sub>)<sub>2</sub>), 23.5 (NHC(CH<sub>3</sub>)<sub>2</sub>), 23.2 (NHC(CH<sub>3</sub>)<sub>2</sub>), 22.7 (NHC(CH<sub>3</sub>)), 17.6 (CH(CH<sub>3</sub>)<sub>2</sub>), 17.4 (CH(CH<sub>3</sub>)<sub>2</sub>);  $\nu_{max}/cm^{-1}$  3322m (N-H), 2977m (C-H), 1665s (C=O), 1525m (C-N);  $m/z$  (ESI<sup>+</sup>) 834.4 ([M+Na]<sup>+</sup>, 100%), HRMS (ESI<sup>+</sup>) found [M+Na]<sup>+</sup> 834.4425 [C<sub>46</sub>H<sub>61</sub>N<sub>5</sub>O<sub>8</sub>Na]<sup>+</sup> requires 834.4412;  $[\alpha]_D^{20} = +10.0$  (c 0.50; CH<sub>3</sub>OH).

### Cbz-L- $\alpha$ Mv-Aib<sub>3</sub>-Bip-OH – S32

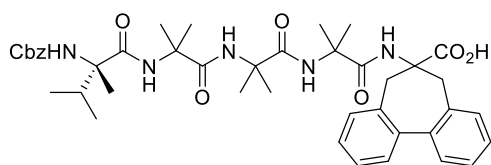

From **S31** (536 mg, 0.66 mmol) according to **General Procedure D**. Crude **S32** was purified by flash column chromatography (99:1 DCM:MeOH increasing to 19:1) to give the pure product as white powder (480 mg, 0.63 mmol, 95%).

$R_f$  0.17 (19:1 DCM:MeOH); **m.p.** 131-133 °C;  $\delta_H$  (400 MHz, CD<sub>3</sub>OD) 7.45-7.10 (13H, m, ArH), 5.17 (1H, d,  $J = 12.7$ , PhCH<sub>2</sub>), 5.03 (1H, d,  $J = 12.7$ , PhCH<sub>2</sub>), 3.13-2.80 (4H, m, ArCH<sub>2</sub>), 1.98 (1H, sep,  $J = 6.5$ , CH(CH<sub>3</sub>)<sub>2</sub>), 1.62-1.48 (6H, m, NHC(CH<sub>3</sub>)<sub>2</sub>), 1.41-1.22 (9H, m, C(CH<sub>3</sub>)<sub>2</sub>), 1.18-1.01 (6H, m, NHC(CH<sub>3</sub>)<sub>2</sub>, NHC(CH<sub>3</sub>)), 0.99 (3H, d,  $J = 6.5$ , CH(CH<sub>3</sub>)<sub>2</sub>), 0.92 (3H, d,  $J = 6.5$ , CH(CH<sub>3</sub>)<sub>2</sub>);  $\delta_C$  (125 MHz, CD<sub>3</sub>OD) 189.1 (CO<sub>2</sub>H), 177.1 (CONH), 177.0 (CONH), 175.7 (CONH), 175.5 (CONH), 158.1 (CO<sub>2</sub>Bn), 142.2, 138.6, 137.6, 130.6, 129.6, 129.0, 128.8, 128.8, 128.7, 128.5 (Ar), 70.8 (ArCH<sub>2</sub>C), 67.7 (NHC(CH<sub>3</sub>)), 63.9 (PhCH<sub>2</sub>), 58.0 (NHC(CH<sub>3</sub>)<sub>2</sub>), 57.9 (NHC(CH<sub>3</sub>)<sub>2</sub>), 57.6 (NHC(CH<sub>3</sub>)<sub>2</sub>), 41.6 (ArCH<sub>2</sub>), 36.0 (CH(CH<sub>3</sub>)<sub>2</sub>), 27.5 (NHC(CH<sub>3</sub>)<sub>2</sub>), 26.9 (NHC(CH<sub>3</sub>)<sub>2</sub>), 26.4 (NHC(CH<sub>3</sub>)<sub>2</sub>), 24.4 (NHC(CH<sub>3</sub>)<sub>2</sub>), 24.2 (NHC(CH<sub>3</sub>)<sub>2</sub>), 23.8

(NHC(CH<sub>3</sub>)<sub>2</sub>), 18.0 (CH(CH<sub>3</sub>)<sub>2</sub>), 17.9 (CH(CH<sub>3</sub>)<sub>2</sub>) 17.6 (NHC(CH<sub>3</sub>));  $\nu_{\max}/\text{cm}^{-1}$  3299m.br (O-H, N-H), 2982m (C-H), 1703s (C=O), 1658m (C=O), 1528m (C-N);  $m/z$  (ESI<sup>-</sup>) 754.6 ([M-H]<sup>-</sup>, 100%), HRMS (ESI<sup>+</sup>) found [M+Na]<sup>+</sup> 778.3784 [C<sub>42</sub>H<sub>53</sub>N<sub>5</sub>O<sub>8</sub>Na]<sup>+</sup> requires 778.3792;  $[\alpha]_{\text{D}}^{20} = +20.0$  (c 0.20; CH<sub>3</sub>OH).

### Cbz-L- $\alpha$ Mv-Aib<sub>3</sub>-Bip-Aib<sub>2</sub>-O<sup>t</sup>Bu – S33

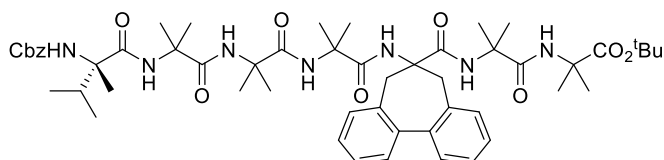

From **S32** (461 mg, 0.61 mmol), EDC.HCl (175 mg, 0.92 mmol), Et<sub>3</sub>N (0.13 mL, 0.92 mmol) and **S10** (164 mg, 0.67 mmol) according to **General Procedure F**. Crude **S33** was purified

by flash column chromatography twice (99:1 DCM:MeOH increasing to 19:1) to give the pure product as white powder (248 mg, 0.25 mmol, 41%).  $R_f$  0.44 (19:1 DCM:MeOH); **m.p.** 224-226 °C;  $\delta_{\text{H}}$  (400 MHz, CDCl<sub>3</sub>) 7.75 (1H, s, CONH), 7.67 (1H, s, CONH), 7.55 (1H, s, CONH), 7.45 (1H, s, CONH), 7.39 (1H, s, CONH), 7.37-7.27 (8H, m, ArH), 7.25-7.02 (5H, m, ArH), 6.18 (1H, d, CONH), 5.70 (1H, s, CONH), 5.16 (1H, d,  $J = 12.2$ , PhCH<sub>2</sub>), 4.99 (1H, d,  $J = 12.2$  PhCH<sub>2</sub>), 3.28 (1H, d,  $J = 13.9$ , ArCH<sub>2</sub>), 3.06 (1H, d,  $J = 13.9$ , ArCH<sub>2</sub>), 2.99 (1H, d,  $J = 13.6$ , ArCH<sub>2</sub>), 2.74 (1H, d,  $J = 13.6$ , ArCH<sub>2</sub>), 1.83 (1H, m, CH(CH<sub>3</sub>)<sub>2</sub>), 1.67 (3H, s, NHC(CH<sub>3</sub>)<sub>2</sub>), 1.58 (3H, s, NHC(CH<sub>3</sub>)<sub>2</sub>), 1.56 (6H, s, NHC(CH<sub>3</sub>)<sub>2</sub>), 1.48 (3H, s, NHC(CH<sub>3</sub>)<sub>2</sub>), 1.46 (3H, s, NHC(CH<sub>3</sub>)<sub>2</sub>), 1.42 (12H, s, NHC(CH<sub>3</sub>)<sub>2</sub>, C(CH<sub>3</sub>)<sub>3</sub>), 1.39 (3H, s, NHC(CH<sub>3</sub>)<sub>2</sub>), 1.35 (3H, s, NHC(CH<sub>3</sub>)<sub>2</sub>), 0.96-0.91 (6H, CH(CH<sub>3</sub>)<sub>2</sub>, NHC(CH<sub>3</sub>)<sub>2</sub>), 0.88 (3H, d,  $J = 6.4$ , CH(CH<sub>3</sub>)<sub>2</sub>), 0.77 (3H, s, NHC(CH<sub>3</sub>)<sub>2</sub>);  $\delta_{\text{C}}$  (100 MHz, CDCl<sub>3</sub>) 174.6 (CONH), 174.3 (CONH), 173.7 (CONH), 173.5 (CONH), 173.3 (CONH), 172.2 (CONH), 171.6 (CO<sub>2</sub>C(CH<sub>3</sub>)<sub>3</sub>), 156.0 (CO<sub>2</sub>Bn), 141.3, 141.0, 141.0, 140.6, 137.5, 137.1, 136.0, 135.6, 135.5, 132.4, 132.3, 130.9, 129.6, 129.5, 128.9, 128.8, 128.4, 128.0, 127.7, 127.5, 127.5, 127.4, 127.2, 127.1, 127.1, 126.6, 126.4 (Ar)<sub>a,b</sub>, 80.6 (C(CH<sub>3</sub>)<sub>3</sub>)<sub>a</sub>, 80.4 (C(CH<sub>3</sub>)<sub>3</sub>)<sub>b</sub>, 69.7 (ArCH<sub>2</sub>C)<sub>a</sub>, 69.5 (ArCH<sub>2</sub>C)<sub>b</sub>, 67.6 (PhCH<sub>2</sub>), 63.0 (NHC(CH<sub>3</sub>)<sub>2</sub>), 57.0 (NHC(CH<sub>3</sub>)<sub>2</sub>), 56.9 (NHC(CH<sub>3</sub>)<sub>2</sub>), 56.7 (NHC(CH<sub>3</sub>)<sub>2</sub>), 56.6 (NHC(CH<sub>3</sub>)<sub>2</sub>), 56.5 (NHC(CH<sub>3</sub>)<sub>2</sub>), 40.6 (ArCH<sub>2</sub>), 36.7 (ArCH<sub>2</sub>)<sub>a</sub>, 36.2 (ArCH<sub>2</sub>)<sub>b</sub>, 35.7 (CH(CH<sub>3</sub>)<sub>2</sub>), 28.1 (C(CH<sub>3</sub>)<sub>3</sub>, NHC(CH<sub>3</sub>)<sub>2</sub>), 27.6 (NHC(CH<sub>3</sub>)<sub>2</sub>), 27.0 (NHC(CH<sub>3</sub>)<sub>2</sub>), 26.7 (NHC(CH<sub>3</sub>)<sub>2</sub>), 23.7 (NHC(CH<sub>3</sub>)<sub>2</sub>), 23.5 (NHC(CH<sub>3</sub>)<sub>2</sub>), 23.2 (NHC(CH<sub>3</sub>)<sub>2</sub>), 22.8 (NHC(CH<sub>3</sub>)<sub>2</sub>), 17.7 (NHC(CH<sub>3</sub>)<sub>2</sub>), 17.4 (CH(CH<sub>3</sub>)<sub>2</sub>), 17.2 (CH(CH<sub>3</sub>)<sub>2</sub>);  $\nu_{\max}/\text{cm}^{-1}$  3304s.br (N-H), 2981s (C-H), 1657s (C=O), 1528s (C-N), 1531m (C-N);  $m/z$  (ESI<sup>+</sup>) 491.0 ([M+2H]<sup>2+</sup>, 100%), HRMS (ESI<sup>+</sup>) found [M+Na]<sup>+</sup> 1004.5445 [C<sub>54</sub>H<sub>75</sub>N<sub>7</sub>O<sub>10</sub>Na]<sup>+</sup> requires 1004.5473;  $[\alpha]_{\text{D}}^{20} = +65.2$  (c 1.00; CH<sub>3</sub>OH).

### Cbz-L- $\alpha$ Mv-Aib<sub>3</sub>-Bip-Aib<sub>2</sub>-OH – S34

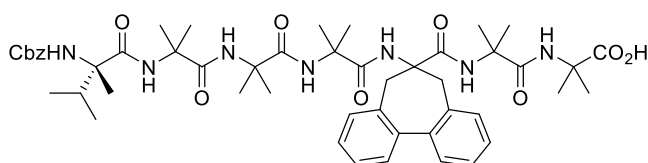

From **S33** (371 mg, 0.38 mmol) according to **General Procedure D**. Crude **S34** was purified by flash column chromatography (99:1

DCM:MeOH increasing to 19:1) to give the pure product as white powder (212 mg, 0.23 mmol, 61%).  $R_f$  0.16 (19:1 DCM:MeOH); **m.p.** 242-243 °C;  $\delta_H$  (400 MHz, CDCl<sub>3</sub>) 7.95-7.73 (3H, m, CONH), 7.47-6.99 (16H, m, ArH, CONH), 6.85 (1H, d, CONH), 6.34 (1H, s, CONH), 5.14 (1H, d,  $J = 12.4$ , PhCH<sub>2</sub>), 4.93 (1H, d,  $J = 12.4$ , PhCH<sub>2</sub>), 3.20 (1H, d,  $J = 13.2$ , ArCH<sub>2</sub>), 3.02 (1H, d,  $J = 13.7$ , ArCH<sub>2</sub>), 2.96 (1H, d,  $J = 13.2$ , ArCH<sub>2</sub>), 2.73 (1H, d,  $J = 13.7$ , ArCH<sub>2</sub>), 1.92 (1H, m, CH(CH<sub>3</sub>)<sub>2</sub>), 1.65 (3H, s, NHC(CH<sub>3</sub>)<sub>2</sub>), 1.63 (3H, s, NHC(CH<sub>3</sub>)<sub>2</sub>), 1.59 (6H, s, NHC(CH<sub>3</sub>)<sub>2</sub>), 1.54 (6H, s, NHC(CH<sub>3</sub>)<sub>2</sub>), 1.36 (3H, s, NHC(CH<sub>3</sub>)<sub>2</sub>), 1.33 (3H, s, NHC(CH<sub>3</sub>)<sub>2</sub>), 1.32 (3H, s, NHC(CH<sub>3</sub>)), 0.96 (3H, d,  $J = 6.0$ , CH(CH<sub>3</sub>)<sub>2</sub>), 0.93 (3H, s, NHC(CH<sub>3</sub>)<sub>2</sub>), 0.82 (3H, d,  $J = 6.0$ , CH(CH<sub>3</sub>)<sub>2</sub>), 0.71 (3H, s, NHC(CH<sub>3</sub>)<sub>2</sub>);  $\delta_C$  (100 MHz, CDCl<sub>3</sub>) 180.4 (CO<sub>2</sub>H), 176.6 (CONH), 176.3 (CONH), 176.0 (CONH), 175.0 (CONH), 174.1 (CONH), 173.9 (CONH), 156.5 (CO<sub>2</sub>Bn), 140.8, 140.7, 137.0, 136.7, 134.8, 130.1, 129.5, 128.6, 128.2, 128.1, 127.9, 127.7, 127.6, 127.4, 127.2, 127.1 (Ar), 69.6 (ArCH<sub>2</sub>C), 66.9 (PhCH<sub>2</sub>), 63.0 (NHC(CH<sub>3</sub>)), 57.3 (NHC(CH<sub>3</sub>)<sub>2</sub>), 56.9 (NHC(CH<sub>3</sub>)<sub>2</sub>), 56.8 (NHC(CH<sub>3</sub>)<sub>2</sub>), 56.7 (NHC(CH<sub>3</sub>)<sub>2</sub>), 56.3 (NHC(CH<sub>3</sub>)<sub>2</sub>), 42.1 (ArCH<sub>2</sub>), 34.8 (ArCH<sub>2</sub>), 34.7 (CH(CH<sub>3</sub>)<sub>2</sub>), 27.5 (NHC(CH<sub>3</sub>)<sub>2</sub>), 27.4 (NHC(CH<sub>3</sub>)<sub>2</sub>), 27.0 (NHC(CH<sub>3</sub>)<sub>2</sub>), 26.7 (NHC(CH<sub>3</sub>)<sub>2</sub>), 26.4 (NHC(CH<sub>3</sub>)<sub>2</sub>), 24.1 (NHC(CH<sub>3</sub>)<sub>2</sub>), 23.3 (NHC(CH<sub>3</sub>)<sub>2</sub>), 22.8 (NHC(CH<sub>3</sub>)<sub>2</sub>), 22.6 (NHC(CH<sub>3</sub>)<sub>2</sub>), 21.7 (NHC(CH<sub>3</sub>)<sub>2</sub>), 17.3 (CH(CH<sub>3</sub>)<sub>2</sub>), 17.2 (CH(CH<sub>3</sub>)<sub>2</sub>), 16.00 (NHC(CH<sub>3</sub>));  $\nu_{max}/cm^{-1}$  3289w.br (O-H), 2982w (C-H), 1652s (C=O), 1527m (C-N);  $m/z$  (ESI<sup>+</sup>) 949.6 ([M+Na]<sup>+</sup>, 100%), 927.6 ([M+H]<sup>+</sup>, 50%), HRMS (ESI<sup>+</sup>) found [M+Na]<sup>+</sup> 948.4855 [C<sub>50</sub>H<sub>67</sub>N<sub>7</sub>O<sub>10</sub>Na]<sup>+</sup> requires 948.4847;  $[\alpha]_D^{20} = +72.0$  (c 0.50; CH<sub>3</sub>OH).

#### Cbz-L- $\alpha$ Mv-Aib<sub>3</sub>-Bip-Aib<sub>3</sub>-D- $\alpha$ Mv-NHMe – 4b

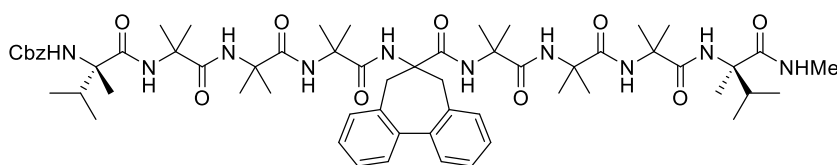

From **S34** (100 mg, 0.11 mmol),  
EDC.HCl (32 mg, 0.17 mmol),  
Et<sub>3</sub>N (30  $\mu$ L, 0.17 mmol) and  
**D-S20** (26 mg, 0.11 mmol)

according to **General Procedure F**. Crude **4b** was purified by flash column chromatography twice (99:1 DCM:MeOH increasing to 19:1) to give the pure product as white powder (76 mg, 0.07 mmol, 61%).  $R_f$  0.39 (19:1 DCM:MeOH); **m.p.** 240-242 °C;  $\delta_H$  (500 MHz, CD<sub>2</sub>Cl<sub>2</sub>/CD<sub>3</sub>OD) 7.90-6.89 (18H, m, ArH, CONH), 5.16-4.90 (2H, m, PhCH<sub>2</sub>), 3.08-2.49 (7H, m, ArCH<sub>2</sub>, NHCH<sub>3</sub>), 2.18-1.73 (2H, m, CH(CH<sub>3</sub>)<sub>2</sub>), 1.56-0.95 (42H, m, NHC(CH<sub>3</sub>)<sub>2</sub>, NHC(CH<sub>3</sub>)), 0.93-0.76 (12H, m, NHC(CH<sub>3</sub>)<sub>2</sub>);  $\delta_C$  (125 MHz, CD<sub>2</sub>Cl<sub>2</sub>/CD<sub>3</sub>OD) 177.0 (CONH), 176.9 (CONH), 176.7 (CONH), 176.6 (CONH), 176.4 (CONH), 176.2 (CONH), 175.5 (CONH), 175.4 (CONH), 173.9 (CONH), 156.9 (CO<sub>2</sub>Bn), 141.4, 141.3, 137.2, 135.5, 130.6, 130.3, 129.2, 128.9, 128.4, 128.3, 128.1, 127.9, 127.8 (Ar), 70.2 (ArCH<sub>2</sub>C), 67.6 (PhCH<sub>2</sub>), 63.5 (NHC(CH<sub>3</sub>)), 57.7-56.8 (NHC(CH<sub>3</sub>)<sub>2</sub>), 36.8-34.7 (ArCH<sub>2</sub>), 30.3 (NHC(CH<sub>3</sub>)), 28.1-22.1 (NHCH<sub>3</sub>, NHC(CH<sub>3</sub>)<sub>2</sub>, NHC(CH<sub>3</sub>)), 19.3-16.3 (CH(CH<sub>3</sub>)<sub>2</sub>);  $\nu_{max}/cm^{-1}$  3296s.br (N-H), 2982w (C-H), 1651s (C=O), 1527m (C-N);  $m/z$  (ESI<sup>+</sup>) 1159.7 ([M+Na]<sup>+</sup>, 100%), HRMS (ESI<sup>+</sup>) found [M+Na]<sup>+</sup> 1159.6530 [C<sub>61</sub>H<sub>88</sub>N<sub>10</sub>O<sub>11</sub>Na]<sup>+</sup> requires 1159.6526;  $[\alpha]_D^{20} = +4.8$  (c = 0.50; CH<sub>3</sub>OH).

### N<sub>3</sub>-Aib-Bip-Aib-D- $\alpha$ Mv-NHMe – S35

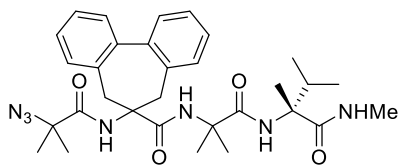

From **S26** (84 mg, 0.23 mmol), EDC.HCl (67 mg, 0.35 mmol), Et<sub>3</sub>N (60  $\mu$ L, 0.35 mmol) and **D-S20** (80 mg, 0.23 mmol) according to

**General Procedure F**. Crude **S35** was purified by flash column chromatography (99:1 DCM:MeOH increasing to 19:1) to give the pure

compound as a clear film (90 mg, 0.04 mmol, 57%).  $R_f$  0.13 (97:3 DCM:MeOH);  $\delta_H$  (400 MHz, CDCl<sub>3</sub>) 7.49-7.37 (5H, m, ArH, CONH), 7.33 (2H, dd,  $J$  = 6.3, 6.3, ArH), 7.24-7.14 (3H, m, ArH, CONH), 6.90 (1H, s, CONH), 6.67 (1H, s, CONH), 3.32-3.09 (2H, m, ArCH<sub>2</sub>), 3.10 (2H, d,  $J$  = 11.0, ArCH<sub>2</sub>), 2.76 (3H, d,  $J$  = 3.2, NHCH<sub>3</sub>), 2.59 (1H, m, ArCH<sub>2</sub>), 2.14 (1H, m, CH(CH<sub>3</sub>)<sub>2</sub>), 1.57 (6H, s, N<sub>3</sub>C(CH<sub>3</sub>)<sub>2</sub>), 1.48 (6H, s, NHC(CH<sub>3</sub>)<sub>2</sub>), 1.43 (3H, s, NHC(CH<sub>3</sub>)), 0.90 (3H, d,  $J$  = 6.8, CH(CH<sub>3</sub>)<sub>2</sub>), 0.87 (3H, d,  $J$  = 6.8, CH(CH<sub>3</sub>)<sub>2</sub>);  $\delta_C$  (100 MHz, CDCl<sub>3</sub>) 174.6 (CONH), 173.2 (CONH), 172.7 (CONH), 171.7 (CONH), 140.7, 140.5, 134.9, 133.6, 130.1, 129.7, 128.6, 128.5, 128.1, 128.1, 128.0, 127.9 (Ar), 69.8 (ArCH<sub>2</sub>C), 64.3 (N<sub>3</sub>C(CH<sub>3</sub>)<sub>2</sub>), 63.4 (NHC(CH<sub>3</sub>)), 57.5 (NHC(CH<sub>3</sub>)<sub>2</sub>), 35.4 (CH(CH<sub>3</sub>)<sub>2</sub>), 31.1 (ArCH<sub>2</sub>), 27.3 (NHC(CH<sub>3</sub>)<sub>2</sub>), 26.6 (NHCH<sub>3</sub>), 24.6 (NHC(CH<sub>3</sub>)<sub>2</sub>), 24.5 (N<sub>3</sub>C(CH<sub>3</sub>)<sub>2</sub>), 24.0 (N<sub>3</sub>C(CH<sub>3</sub>)<sub>2</sub>), 17.9 (NHC(CH<sub>3</sub>)), 17.6 (CH(CH<sub>3</sub>)<sub>2</sub>), 17.2 (CH(CH<sub>3</sub>)<sub>2</sub>);  $\nu_{max}/cm^{-1}$  3346m.br (N-H), 2972w (C-H), 2113m (N<sub>3</sub>), 1664s (C=O), 1512m (C-N);  $m/z$  (ESI<sup>+</sup>) 576.3 ([M+H]<sup>+</sup>, 100%), HRMS (ESI<sup>+</sup>) found [M+Na]<sup>+</sup> 598.3099 [C<sub>31</sub>H<sub>41</sub>N<sub>7</sub>O<sub>4</sub>]<sup>+</sup> requires 598.3118;  $[\alpha]_D^{20}$  = -72.8 (c 1.00; CH<sub>3</sub>OH).

### H-Aib-Bip-Aib-D- $\alpha$ Mv-NHMe – S36

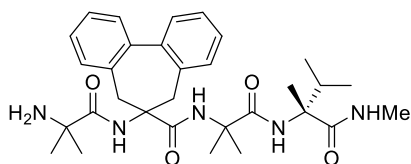

From **S35** (90 mg, 0.16 mmol) according to **General Procedure B**.

**S36** was obtained as a clear oil (88 mg, 0.16 mmol, *quant.*).  $R_f$  0.06 (19:1 DCM:MeOH);  $\delta_H$  (400 MHz, CD<sub>3</sub>OD) 7.47-7.38 (4H, m, ArH),

7.36-7.26 (2H, m, ArH), 7.23-7.08 (2H, m, ArH), 3.01-2.56 (7H, m,

ArCH<sub>2</sub>, NHCH<sub>3</sub>), 2.20 (1H, m, CH(CH<sub>3</sub>)<sub>2</sub>), 1.56-1.42 (6H, m, H<sub>2</sub>NC(CH<sub>3</sub>)<sub>2</sub>, NHC(CH<sub>3</sub>)<sub>2</sub>), 1.41 (3H, s, H<sub>2</sub>NC(CH<sub>3</sub>)<sub>2</sub>), 1.40 (3H, s, NHC(CH<sub>3</sub>)), 1.39 (3H, s, NHC(CH<sub>3</sub>)), 1.02 (3H, d,  $J$  = 6.6, CH(CH<sub>3</sub>)<sub>2</sub>), 0.91 (3H, d,  $J$  = 6.6, CH(CH<sub>3</sub>)<sub>2</sub>);  $\delta_C$  (100 MHz, CDCl<sub>3</sub>) 174.9 (CONH), 173.2 (CONH), 173.0 (CONH), 172.9 (CONH), 140.3, 130.7, 128.5, 128.4, 128.3, 128.2, 128.0, 128.0, 127.9, 127.9, 127.8, 127.8 (Ar), 69.6 (ArCH<sub>2</sub>C), 63.3 (NHC(CH<sub>3</sub>)), 57.3 (NHC(CH<sub>3</sub>)<sub>2</sub>), 55.1 (H<sub>2</sub>NC(CH<sub>3</sub>)<sub>2</sub>), 35.5 (CH(CH<sub>3</sub>)<sub>2</sub>), 29.8 (H<sub>2</sub>NC(CH<sub>3</sub>)<sub>2</sub>), 29.2 (NHC(CH<sub>3</sub>)<sub>2</sub>), 26.7 (NHCH<sub>3</sub>), 18.6 (NHC(CH<sub>3</sub>)), 17.7 (CH(CH<sub>3</sub>)<sub>2</sub>), 17.6 (CH(CH<sub>3</sub>)<sub>2</sub>);  $\nu_{max}/cm^{-1}$  3328m.br (N-H), 2971w (C-H), 1667s (C=O), 1512m (C-N);  $m/z$  (ESI<sup>+</sup>) 550.4 ([M+H]<sup>+</sup>, 100%), HRMS (ESI<sup>+</sup>) found [M+Na]<sup>+</sup> 572.3200 [C<sub>31</sub>H<sub>43</sub>N<sub>5</sub>O<sub>4</sub>Na]<sup>+</sup> requires 572.3213;  $[\alpha]_D^{20}$  = -58.4 (c 1.00; CH<sub>3</sub>OH).

### Cbz-L- $\alpha$ Mv-Aib<sub>4</sub>-OH – S37

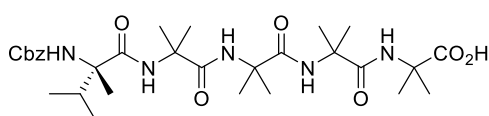

Prepared as previously reported.<sup>4</sup>

### Cbz-L- $\alpha$ Mv-Aib<sub>5</sub>-Bip-Aib-D- $\alpha$ Mv-NHMe – 4c

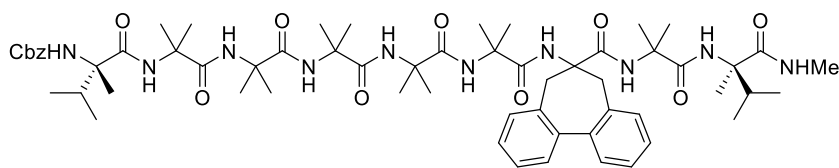

From **S37** (97 mg, 0.16 mmol), EDC.HCl (46 mg, 0.24 mmol), Et<sub>3</sub>N (40  $\mu$ L, 0.24 mmol) and **S36** (88 mg, 0.16 mmol) according to

**General Procedure F.** Crude **4c** was purified by flash column chromatography (99:1 DCM:MeOH increasing to 19:1) to give the pure compound as a white solid (34 mg, 0.03 mmol, 19%).  $R_f$  0.32 (19:1 DCM:MeOH); **m.p.** 190-192 °C;  $\delta_H$  (500 MHz, CDCl<sub>3</sub>) 7.77-6.89 (2H, m, ArH, CONH), 6.68 (1H, s, CONH), 5.86 (1H, s, CONH), 5.13-4.93 (2H, m, PhCH<sub>2</sub>), 3.26-2.51 (7H, m, ArCH<sub>2</sub>, NHCH<sub>3</sub>), 2.34-1.88 (2H, m, CH(CH<sub>3</sub>)<sub>2</sub>), 1.81-1.09 (42H, m, NHC(CH<sub>3</sub>)<sub>2</sub>, NHC(CH<sub>3</sub>)), 0.95-0.81 (12H, m, NHC(CH<sub>3</sub>)<sub>2</sub>);  $\delta_C$  (125 MHz, CD<sub>2</sub>Cl<sub>2</sub>/CD<sub>3</sub>OD) 176.0 (CONH), 175.8 (CONH), 175.8 (CONH), 175.6 (CONH), 175.1 (CONH), 174.8 (CONH), 174.3 (CONH), 173.4 (CONH), 156.3 (CO<sub>2</sub>Bn), 140.7, 140.7, 136.5, 130.2, 129.8, 128.6, 128.3, 127.8, 127.3, 127.3 (Ar), 69.7 (ArCH<sub>2</sub>C), 67.0 (PhCH<sub>2</sub>), 63.2 (NHC(CH<sub>3</sub>)), 62.9 (NHC(CH<sub>3</sub>)), 57.3-56.2 (NHC(CH<sub>3</sub>)<sub>2</sub>), 36.0-33.7 (ArCH<sub>2</sub>), 31.9 (NHC(CH<sub>3</sub>)), 29.8-21.7 (NHCH<sub>3</sub>, NHC(CH<sub>3</sub>)<sub>2</sub>, NHC(CH<sub>3</sub>)), 18.3-16.6 (CH(CH<sub>3</sub>)<sub>2</sub>);  $\nu_{max}/cm^{-1}$  3294m.br (N-H), 2983m (C-H), 1652s (C=O), 1530m (C-N);  $m/z$  (ESI<sup>+</sup>) 1159.7 ([M+Na]<sup>+</sup>, 100%), HRMS (ESI<sup>+</sup>) found [M+Na]<sup>+</sup> 1159.6530 [C<sub>61</sub>H<sub>88</sub>N<sub>10</sub>O<sub>11</sub>Na]<sup>+</sup> requires 1159.6526;  $[\alpha]_D^{20} = -7.4$  (c 0.50; CH<sub>3</sub>OH).

### H-Aib<sub>3</sub>-O<sup>t</sup>Bu – S38

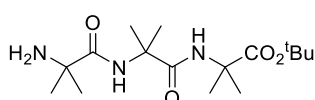

Prepared as previously reported.<sup>5</sup>

### Cbz-Gly-Aib<sub>3</sub>-O<sup>t</sup>Bu – S39

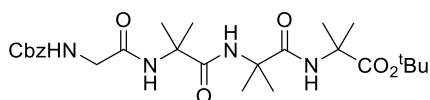

From Cbz-Gly-OH (211 mg, 1.01 mmol), NMM (0.29 mL, 1.58 mmol), <sup>t</sup>BuCOCl (0.13 mL, 1.01 mmol) and **S38** (500 mg, 1.52 mmol) according to **General Procedure E.** Crude **S39** was

purified by flash column chromatography (99:1 DCM:MeOH increasing to 19:1) to give the pure product as a white powder (467 mg, 0.90 mmol, 89%).  $R_f$  0.31 (19:1 DCM:MeOH); **m.p.** 139-141 °C;  $\delta_H$  (500 MHz, CDCl<sub>3</sub>) 7.38-7.30 (5H, m, PhH) 7.05 (1H, s, CONH), 6.80 (1H, s, CONH), 6.54 (1H, s, CONH), 5.72 (1H, s, br, NHCO<sub>2</sub>), 5.13 (2H, s, PhCH<sub>2</sub>), 3.77 (2H, d,  $J = 5.1$ , NHCH<sub>2</sub>), 1.48 (6H, s, NHC(CH<sub>3</sub>)<sub>2</sub>), 1.46 (6H, s, NHC(CH<sub>3</sub>)<sub>2</sub>), 1.45 (6H, s, NHC(CH<sub>3</sub>)<sub>2</sub>), 1.43 (9H, s, C(CH<sub>3</sub>)<sub>3</sub>);  $\delta_C$  (125 MHz, CDCl<sub>3</sub>) 174.0 (CONH), 173.3 (CONH), 172.5 (CONH), 169.2 (CO<sub>2</sub>C(CH<sub>3</sub>)<sub>3</sub>), 157.1 (CO<sub>2</sub>Bn), 136.0, 128.6, 128.5, 128.2 (Ar), 80.7

(C(CH<sub>3</sub>)<sub>3</sub>), 67.5 (PhCH<sub>2</sub>), 57.2 (NHC(CH<sub>3</sub>)<sub>2</sub>), 56.8 (NHC(CH<sub>3</sub>)<sub>2</sub>), 53.5 (NHC(CH<sub>3</sub>)<sub>2</sub>), 45.5 (NHCH<sub>2</sub>), 27.9 (C(CH<sub>3</sub>)<sub>3</sub>), 25.2 (NHC(CH<sub>3</sub>)<sub>2</sub>), 25.1 (NHC(CH<sub>3</sub>)<sub>2</sub>), 24.5 (NHC(CH<sub>3</sub>)<sub>2</sub>);  $\nu_{\max}/\text{cm}^{-1}$  3323m.br (N-H), 2982m (C-H), 1672s (C=O), 1531s (C-N);  $m/z$  (ESI<sup>+</sup>) 543.7 ([M+Na]<sup>+</sup>, 100%), HRMS (ESI<sup>+</sup>) found [M+Na]<sup>+</sup> 543.2800 [C<sub>26</sub>H<sub>40</sub>N<sub>4</sub>O<sub>7</sub>Na]<sup>+</sup> requires 543.2789.

### Cbz-Gly-Aib<sub>3</sub>-OH – S40

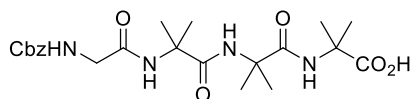

From **S39** (467 mg, 0.90 mmol) according to **General Procedure D**.

Crude **S40** was purified by flash column chromatography (99:1 DCM:MeOH increasing to 19:1) to give the pure product as a white powder (361 mg, 0.78 mmol, 87%).  $R_f$  0.30 (19:1 DCM:MeOH); **m.p.** 193-195 °C;  $\delta_H$  (400 MHz, CD<sub>3</sub>OD) 8.31 (1H, s, br, CONH), 7.56 (1H, s, br, CONH), 7.42 (1H, s, br, CONH), 7.35-7.24 (5H, m, PhH) 5.07 (2H, s, PHCH<sub>2</sub>), 3.68 (2H, d,  $J$  = 5.1, NHCH<sub>2</sub>), 1.44 (6H, s, NHC(CH<sub>3</sub>)<sub>2</sub>), 1.40 (6H, s, NHC(CH<sub>3</sub>)<sub>2</sub>), 1.38 (6H, s, NHC(CH<sub>3</sub>)<sub>2</sub>);  $\delta_C$  (100 MHz, CD<sub>3</sub>OD) 178.2 (CO<sub>2</sub>H), 176.4 (CONH), 175.9 (CONH), 172.3 (CONH), 159.3 (CO<sub>2</sub>Bn), 138.1, 129.5, 129.1, 128.9 (Ar), 68.0 (PhCH<sub>2</sub>), 57.8 (NHC(CH<sub>3</sub>)<sub>2</sub>), 57.7 (NHC(CH<sub>3</sub>)<sub>2</sub>), 56.9 (NHC(CH<sub>3</sub>)<sub>2</sub>), 45.2 (NHCH<sub>2</sub>), 25.4 (C(CH<sub>3</sub>)<sub>3</sub>), 25.2 (NHC(CH<sub>3</sub>)<sub>2</sub>);  $\nu_{\max}/\text{cm}^{-1}$  2986m (C-H), 2481m.br (O-H), 1652s (C=O), 1429s (C-N);  $m/z$  (ESI<sup>+</sup>) 487.4 ([M+Na]<sup>+</sup>, 100%), HRMS (ESI<sup>+</sup>) found [M+Na]<sup>+</sup> 487.2160 [C<sub>26</sub>H<sub>40</sub>N<sub>4</sub>O<sub>7</sub>Na]<sup>+</sup> requires 487.2163.

### Cbz-Gly-Aib<sub>4</sub>-L/D- $\alpha$ Mv-NHMe – S41

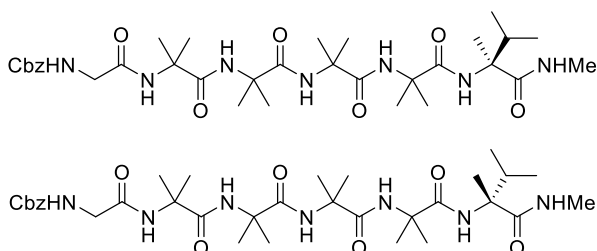

From **S40** (180 mg, 0.54 mmol), EDC.HCl (156 mg, 0.82 mmol), DIPEA (0.14 mL, 0.82 mmol) and **S20** (124 mg, 0.54 mmol) according to **General**

**Procedure F**. Crude **S41** was purified by flash column chromatography (99:1 DCM:MeOH increasing to 19:1) to give the pure product as a white powder (137 mg, 0.25 mmol, 46%).

$R_f$  0.09 (19:1 DCM:MeOH); **m.p.** 242-244 °C;  $\delta_H$  (400 MHz, CDCl<sub>3</sub>) 8.36 (1H, s, CONH), 7.99 (1H, s, CONH), 7.77 (1H, s, CONH), 7.72 (1H, s, CONH), 7.40-7.25 (6H, m, PhH, CONH), 5.14 (1H, d,  $J$  = 12.5, PHCH<sub>2</sub>), 5.08 (1H, d,  $J$  = 12.5, PHCH<sub>2</sub>), 3.80 (1H, d,  $J$  = 16.6, NHCH<sub>2</sub>), 3.67 (1H, d,  $J$  = 16.6, NHCH<sub>2</sub>), 2.74 (3H, s, NHCH<sub>3</sub>), 2.13 (1H, sep,  $J$  = 6.8, CH(CH<sub>3</sub>)<sub>2</sub>), 1.46 (3H, s, NHC(CH<sub>3</sub>)<sub>2</sub>), 1.43 (3H, s, NHC(CH<sub>3</sub>)<sub>2</sub>), 1.42 (3H, s, NHC(CH<sub>3</sub>)<sub>2</sub>), 1.41 (3H, s, NHC(CH<sub>3</sub>)<sub>2</sub>), 1.40 (3H, s, NHC(CH<sub>3</sub>)<sub>2</sub>), 1.39 (3H, s, NHC(CH<sub>3</sub>)<sub>2</sub>), 1.38 (3H, s, NHC(CH<sub>3</sub>)<sub>2</sub>), 1.01 (3H, d,  $J$  = 6.8, CH(CH<sub>3</sub>)<sub>2</sub>), 0.93 (3H, d,  $J$  = 6.8, CH(CH<sub>3</sub>)<sub>2</sub>);  $\delta_C$  (125 MHz, CD<sub>3</sub>OD) 150.5 (CONHCH<sub>3</sub>), 179.9 (CONH), 179.5 (CONH), 179.4 (CONH), 179.2 (CONH), 174.7 (CH<sub>2</sub>CONH), 161.9z (CO<sub>2</sub>Bn), 140.7, 132.1, 131.7, 131.3 (Ar), 70.3 (NHC(CH<sub>3</sub>)<sub>2</sub>), 67.0 (PhCH<sub>2</sub>), 60.7 (NHC(CH<sub>3</sub>)<sub>2</sub>), 60.4 (NHC(CH<sub>3</sub>)<sub>2</sub>), 60.3 (NHC(CH<sub>3</sub>)<sub>2</sub>), 60.1 (NHC(CH<sub>3</sub>)<sub>2</sub>), 47.8 (NHCH<sub>2</sub>), 39.4 (CH(CH<sub>3</sub>)<sub>2</sub>), 30.0 (NHC(CH<sub>3</sub>)<sub>3</sub>), 29.6 (NHC(CH<sub>3</sub>)<sub>2</sub>), 29.3 (NHC(CH<sub>3</sub>)<sub>2</sub>), 29.0 (NHCH<sub>3</sub>), 28.8 (NHC(CH<sub>3</sub>)<sub>2</sub>) 26.8



(NHC(CH<sub>3</sub>)<sub>2</sub>), 26.7 (NHC(CH<sub>3</sub>)<sub>2</sub>), 26.5 (NHC(CH<sub>3</sub>)<sub>2</sub>), 26.4 (NHC(CH<sub>3</sub>)<sub>2</sub>), 26.3 (NHC(CH<sub>3</sub>)<sub>2</sub>), 20.9 (CH(CH<sub>3</sub>)<sub>2</sub>), 20.3 (CH(CH<sub>3</sub>)<sub>2</sub>);  $\nu_{\max}/\text{cm}^{-1}$  2983m (C-H), 2472m.br (N-H), 1646s (C=O), 1413m (C-N);  $m/z$  (ESI<sup>+</sup>) 699.6 ([M+Na]<sup>+</sup>, 100%), HRMS (ESI<sup>+</sup>) found [M+H]<sup>+</sup> 676.4019 [C<sub>33</sub>H<sub>54</sub>N<sub>7</sub>O<sub>8</sub>]<sup>+</sup> requires 676.4028; (L)  $[\alpha]_{\text{D}}^{20} = +30.8$  (c 1.00; CH<sub>3</sub>OH), (D)  $[\alpha]_{\text{D}}^{20} = -26.3$  (c 0.99, CH<sub>3</sub>OH).

### H-Gly-Aib<sub>4</sub>-L/D- $\alpha$ Mv-NHMe – S42

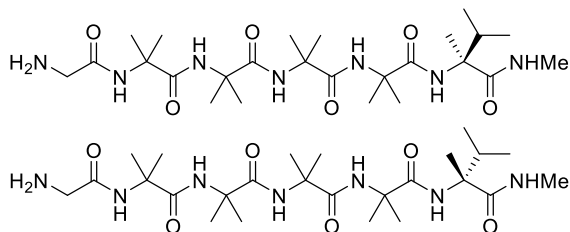

From **S41** (137 mg, 0.21 mmol) according to **General Procedure B**. **S42** was obtained as a white powder

(105 mg, 0.19 mmol, 92%).  $R_f$  0.00 (19:1 DCM:MeOH); **m.p.** 258-260 °C;  $\delta_{\text{H}}$  (400 MHz, CD<sub>3</sub>OD) 3.37-3.31 (2H, m, NHCH<sub>2</sub>), 2.77 (3H, s, NHCH<sub>3</sub>), 2.16 (1H, sep,  $J = 6.7$ ,

CH(CH<sub>3</sub>)<sub>2</sub>), 1.51-1.42 (24H, m, NHC(CH<sub>3</sub>)<sub>2</sub>), 1.39 (3H, s, NHC(CH<sub>3</sub>)), 1.04 (3H, d,  $J = 6.7$ , CH(CH<sub>3</sub>)<sub>2</sub>), 0.96 (3H, d,  $J = 6.7$ , CH(CH<sub>3</sub>)<sub>2</sub>);  $\delta_{\text{C}}$  (100 MHz, CD<sub>3</sub>OD) 177.9 (CONHCH<sub>3</sub>), 177.3 (CONH), 176.9 (CONH), 176.7 (CONH), 176.5 (CONH), 174.5 (CH<sub>2</sub>CONH) 64.5 (NHC(CH<sub>3</sub>)), 60.7 (NHC(CH<sub>3</sub>)<sub>2</sub>), 58.1 (NHC(CH<sub>3</sub>)<sub>2</sub>), 57.8 (NHC(CH<sub>3</sub>)<sub>2</sub>), 57.7 (NHC(CH<sub>3</sub>)<sub>2</sub>), 57.4 (NHC(CH<sub>3</sub>)<sub>2</sub>), 45.0 (NHCH<sub>2</sub>), 36.9 (NHCH(CH<sub>3</sub>)<sub>2</sub>), 27.4 (NHC(CH<sub>3</sub>)<sub>3</sub>), 26.9 (NHC(CH<sub>3</sub>)<sub>2</sub>), 26.6 (NHC(CH<sub>3</sub>)<sub>2</sub>), 26.5 (NHCH<sub>3</sub>), 26.2 (NHC(CH<sub>3</sub>)<sub>2</sub>) 24.4 (NHC(CH<sub>3</sub>)<sub>2</sub>), 24.0 (NHC(CH<sub>3</sub>)<sub>2</sub>), 23.8 (NHC(CH<sub>3</sub>)<sub>2</sub>), 23.8 (NHC(CH<sub>3</sub>)<sub>2</sub>), 23.8 (NHC(CH<sub>3</sub>)), 18.3 (CH(CH<sub>3</sub>)<sub>2</sub>), 17.7 (CH(CH<sub>3</sub>)<sub>2</sub>);  $\nu_{\max}/\text{cm}^{-1}$  3378m.br (N-H), 2970m (C-H), 2476m.br (N-H), 1639s (C=O), 1424s (C-N);  $m/z$  (ESI<sup>+</sup>) 564.4 ([M+Na]<sup>+</sup>, 100%), HRMS (ESI<sup>+</sup>) found [M+Na]<sup>+</sup> 564.3480 [C<sub>25</sub>H<sub>47</sub>N<sub>7</sub>O<sub>6</sub>Na]<sup>+</sup> requires 564.3480; (L)  $[\alpha]_{\text{D}}^{20} = +19.6$  (c 1.00; CH<sub>3</sub>OH), (D)  $[\alpha]_{\text{D}}^{20} = -22.4$  (c 1.00; CH<sub>3</sub>OH).

### Cbz-L- $\alpha$ Mv-Aib<sub>4</sub>-Gly-Aib<sub>4</sub>-L- $\alpha$ Mv-NHMe – 5a

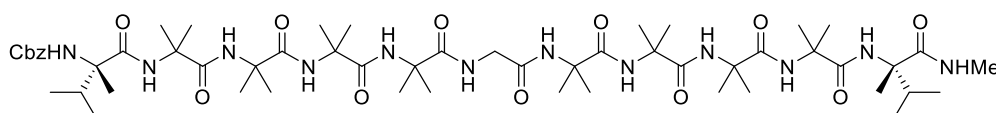

From **S37** (56 mg, 0.09 mmol), EDC.HCl (26 mg,

0.14 mmol), DIPEA (24  $\mu$ L, 0.14 mmol) and **L-S42** (46 mg, 0.09 mmol) according to **General Procedure F**. Crude **5a** was purified by flash column chromatography (99:1 DCM:MeOH increasing to 19:1) to give the pure compound as a clear solid (26 mg, 0.02 mmol, 26%).  $R_f$  0.15 (19:1 DCM:MeOH); **m.p.** 245-247 °C  $\delta_{\text{H}}$  (400 MHz, CDCl<sub>3</sub>) 8.19 (1H, t,  $J = 5.4$ , CONH), 7.91 (1H, s, CONH), 7.81 (1H, s, CONH), 7.78 (1H, s, CONH), 7.69 (1H, s, CONH), 7.61 (H, s, CONH), 7.51 (1H, s, CONH), 7.46-7.30 (7H, m, CONH, PhH), 7.02 (1H, s, CONH), 6.64 (1H, s, br, CONH), 5.68 (1H, s, br, CONH), 5.09 (2H, ABq,  $\Delta\delta_{\text{AB}} = 0.03$ ,  $J_{\text{AB}} = 12.4$ , PhCH<sub>2</sub>), 3.86 (1H, dd,  $J = 16.4$ , 5.0, NHCH<sub>2</sub>), 3.67 (1H, dd,  $J = 16.4$ , 6.1, NHCH<sub>2</sub>), 2.79 (3H, d,  $J = 4.5$ , NHCH<sub>3</sub>), 2.13 (1H, sep,  $J = 6.7$ , CH(CH<sub>3</sub>)<sub>2</sub>), 1.99 (1H, m, CH(CH<sub>3</sub>)<sub>2</sub>), 1.48 (3H, s, NHC(CH<sub>3</sub>)<sub>2</sub>), 1.45 (12H, s, NHC(CH<sub>3</sub>)<sub>2</sub>), 1.44 (9H, s, NHC(CH<sub>3</sub>)<sub>2</sub>), 1.42 (6H, s, NHC(CH<sub>3</sub>)<sub>2</sub>), 1.41 (9H, s, NHC(CH<sub>3</sub>)<sub>2</sub>), 1.39 (6H, s, NHC(CH<sub>3</sub>)<sub>2</sub>), 1.37 (3H, s, NHC(CH<sub>3</sub>)<sub>2</sub>), 1.36 (3H, s, NHC(CH<sub>3</sub>)), 1.35 (3H, s, NHC(CH<sub>3</sub>)), 1.00-0.82 (12H,

m, CH(CH<sub>3</sub>)<sub>2</sub>);  $\delta_c$  (100 MHz, CDCl<sub>3</sub>) 177.9, 176.6, 176.3, 176.1, 175.8, 175.6, 175.2, 174.9, 174.6, 173.5, 171.0 (CONH), 156.5 (CO<sub>2</sub>Bn), 136.3, 128.9, 128.8, 128.3 (Ar), 67.6 (PhCH<sub>2</sub>), 63.4 (NHC(CH<sub>3</sub>)<sub>2</sub>), 63.3 (NHC(CH<sub>3</sub>)<sub>2</sub>), 57.1, 57.0, 56.9, 56.9, 56.7 (NHC(CH<sub>3</sub>)<sub>2</sub>), 45.5 (NHCH<sub>2</sub>), 36.0, 35.6 (CH(CH<sub>3</sub>)<sub>2</sub>), 27.6 (NHCH<sub>3</sub>), 27.5-26.9 (NHC(CH<sub>3</sub>)<sub>2</sub>), 23.0-22.8 (NHC(CH<sub>3</sub>)<sub>2</sub>, NHC(CH<sub>3</sub>)<sub>2</sub>), 17.9, 17.4, 17.3, 17.2 (CH(CH<sub>3</sub>)<sub>2</sub>);  $\nu_{\max}/\text{cm}^{-1}$  3289m (N-H), 2984w (C-H), 1655s (C=O), 1535m (C-N);  $m/z$  (ESI<sup>+</sup>) 1152.8 ([M+Na]<sup>+</sup>, 100%), HRMS (ESI<sup>+</sup>) found [M+H]<sup>+</sup> 1129.6974 [C<sub>55</sub>H<sub>93</sub>N<sub>12</sub>O<sub>13</sub>]<sup>+</sup> requires 1129.6980;  $[\alpha]_{\text{D}}^{20} = +44.2$  (c 0.95; CH<sub>3</sub>OH).

### Cbz-L- $\alpha$ Mv-Aib<sub>4</sub>-Gly-Aib<sub>4</sub>-D- $\alpha$ Mv-NHMe – 5b

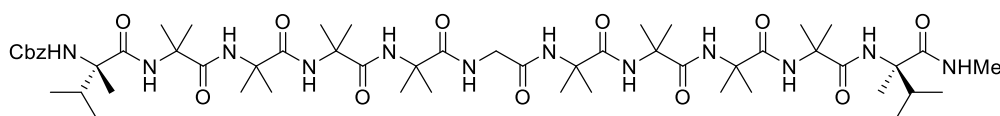

From **S37** (62 mg,  
0.10 mmol),  
EDC.HCl (28 mg,

0.15 mmol), DIPEA (26  $\mu$ L, 0.15 mmol) and **D-S42** (53 mg, 0.09 mmol) according to **General Procedure F**. Crude **5b** was purified by flash column chromatography (99:1 DCM:MeOH increasing to 19:1) to give the pure compound as a clear solid (26 mg, 0.02 mmol, 26%).  $R_f$  0.18 (19:1 DCM:MeOH); **m.p.** 240-242 °C  $\delta_H$  (400 MHz, CDCl<sub>3</sub>) 8.06 (1H, s, br, CONH), 7.95 (1H, s, CONH), 7.76 (1H, s, CONH), 7.75 (1H, s, CONH), 7.62 (1H, s, CONH), 7.52 (2H, s, CONH), 7.40-7.29 (6H, m, CONH, PhH), 7.22 (1H, s, CONH), 7.10 (1H, s, CONH), 6.94 (1H, s, br, CONH), 6.09 (1H, s, br, CONH), 5.13 (1H, d,  $J = 12.4$ , PhCH<sub>2</sub>), 5.06 (1H, d,  $J = 12.4$ , PhCH<sub>2</sub>), 3.95 (1H, dd,  $J = 16.5, 6.2$ , NHCH<sub>2</sub>), 3.66 (1H, dd,  $J = 16.5, 4.9$ , NHCH<sub>2</sub>), 2.77 (3H, d,  $J = 4.2$ , NHCH<sub>3</sub>), 2.25 (1H, sep,  $J = 6.3$ , CH(CH<sub>3</sub>)<sub>2</sub>), 2.15 (1H, sep,  $J = 6.3$ , CH(CH<sub>3</sub>)<sub>2</sub>), 1.55 (3H, s, NHC(CH<sub>3</sub>)<sub>2</sub>), 1.53 (6H, s, NHC(CH<sub>3</sub>)<sub>2</sub>), 1.52 (3H, s, NHC(CH<sub>3</sub>)<sub>2</sub>), 1.49 (15H, s, NHC(CH<sub>3</sub>)<sub>2</sub>), 1.47 (6H, s, NHC(CH<sub>3</sub>)<sub>2</sub>), 1.45 (6H, s, NHC(CH<sub>3</sub>)<sub>2</sub>), 1.42 (3H, s, NHC(CH<sub>3</sub>)<sub>2</sub>), 1.41 (3H, s, NHC(CH<sub>3</sub>)<sub>2</sub>), 1.40 (3H, s, NHC(CH<sub>3</sub>)<sub>2</sub>), 1.39 (3H, s, NHC(CH<sub>3</sub>)), 1.33 (3H, s, NHC(CH<sub>3</sub>)), 1.02-0.90 (12H, m, CH(CH<sub>3</sub>)<sub>2</sub>);  $\delta_c$  (100 MHz, CDCl<sub>3</sub>) 177.3, 176.8, 176.4, 176.1, 175.9, 175.5, 175.1, 174.9, 174.8, 174.3, 171.1 (CONH), 156.5 (CO<sub>2</sub>Bn), 136.4, 128.8, 128.6, 128.0 (Ar), 67.3 (PhCH<sub>2</sub>), 63.1 (NHC(CH<sub>3</sub>)<sub>2</sub>), 62.9 (NHC(CH<sub>3</sub>)<sub>2</sub>), 57.2, 57.0, 57.0, 56.9, 56.8 (NHC(CH<sub>3</sub>)<sub>2</sub>), 45.1 (NHCH<sub>2</sub>), 35.1, 34.6 (CH(CH<sub>3</sub>)<sub>2</sub>), 26.8-24.0 (NHCH<sub>3</sub>, NHC(CH<sub>3</sub>)<sub>2</sub>, NHC(CH<sub>3</sub>)<sub>2</sub>), 18.0, 17.8, 17.5, 17.4 (CH(CH<sub>3</sub>)<sub>2</sub>);  $\nu_{\max}/\text{cm}^{-1}$  3290m (N-H), 2984w (C-H), 1651s (C=O), 1529m (C-N);  $m/z$  (ESI<sup>+</sup>) 1152.8 ([M+Na]<sup>+</sup>, 100%), HRMS (ESI<sup>+</sup>) found [M+H]<sup>+</sup> 1129.6980 [C<sub>55</sub>H<sub>93</sub>N<sub>12</sub>O<sub>13</sub>]<sup>+</sup> requires 1129.6980;  $[\alpha]_{\text{D}}^{20} = -7.5$  (c 0.40, CH<sub>3</sub>OH).

### Cbz-L- $\alpha$ Mv-Aib<sub>2</sub>-OH – S43

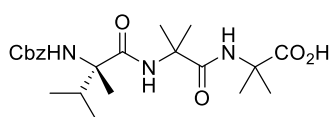

From **S11** (195 mg, 0.39 mmol) according to **General Procedure D**. Crude **S43** was purified by automatic purification system (99:1 DCM:MeOH increasing to 9:1) to give the pure product (121 mg, 0.28 mmol, 72%).  $R_f$  0.21

(19:1 DCM:MeOH); **m.p.** 180-182 °C;  $\delta_H$  (400 MHz, CDCl<sub>3</sub>) 7.42 (1H, s, CONH) 7.38-7.32 (5H, m, PhH),

6.46 (1H, s, CONH), 5.35 (1H, s, CONH), 5.16 (1H, d,  $J = 12.2$ , PhCH<sub>2</sub>), 5.03 (1H, d,  $J = 12.2$ , PhCH<sub>2</sub>), 1.96 (1H, sep,  $J = 6.9$ , CH(CH<sub>3</sub>)<sub>2</sub>), 1.55 (3H, s, NHC(CH<sub>3</sub>)<sub>2</sub>), 1.52 (3H, s, NHC(CH<sub>3</sub>)<sub>2</sub>), 1.48 (3H, s, NHC(CH<sub>3</sub>)<sub>2</sub>), 1.41 (3H, s, NHC(CH<sub>3</sub>)<sub>2</sub>), 1.26 (3H, s, NHC(CH<sub>3</sub>)), 0.97 (3H, d,  $J = 6.9$ , CH(CH<sub>3</sub>)<sub>2</sub>), 0.92 (3H, d,  $J = 6.9$ , CH(CH<sub>3</sub>)<sub>2</sub>);  $\delta_c$  (100 MHz, CDCl<sub>3</sub>); 174.9 (CO<sub>2</sub>H), 173.1 (CONH), 169.3 (CONH), 156.2 (CO<sub>2</sub>Bn), 136.1, 128.9, 128.8, 128.4 (Ar), 67.6 (PhCH<sub>2</sub>), 63.3 (NHC(CH<sub>3</sub>)), 57.5 (NHC(CH<sub>3</sub>)<sub>2</sub>), 57.0 (NHC(CH<sub>3</sub>)<sub>2</sub>), 35.7 (CH(CH<sub>3</sub>)<sub>2</sub>), 26.9 (CH(CH<sub>3</sub>)<sub>2</sub>), 25.4 (NHCH<sub>3</sub>), 24.8 (NHC(CH<sub>3</sub>)<sub>2</sub>), 23.8 (NHC(CH<sub>3</sub>)<sub>2</sub>), 17.5 (NHC(CH<sub>3</sub>)), 17.4 (CH(CH<sub>3</sub>)<sub>2</sub>), 17.2 (CH(CH<sub>3</sub>)<sub>2</sub>);  $\nu_{\max}/\text{cm}^{-1}$  3350m.br (N-H, O-H), 2924m (C-H), 1705s (C=O), 1667s (C=O), 1510s (C-N), 1453m (C-O);  $m/z$  (ESI<sup>+</sup>) 458.2 ([M+Na]<sup>+</sup>, 100%), HRMS (ESI<sup>+</sup>) found [M+Na]<sup>+</sup> 458.2260 [C<sub>22</sub>H<sub>33</sub>N<sub>3</sub>O<sub>6</sub>Na]<sup>+</sup> requires 458.2262;  $[\alpha]_{\text{D}}^{20} = +12.0$  (c 1.00; CH<sub>3</sub>OH).

### N<sub>3</sub>-Aib<sub>3</sub>-OH – S44

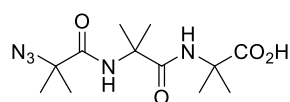

Prepared as previously reported.<sup>8</sup>

### N<sub>3</sub>-Aib<sub>4</sub>-D- $\alpha$ Mv-NHMe – S45

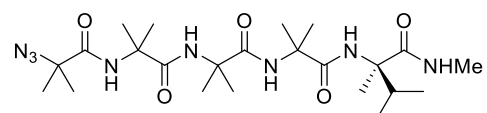

From **S44** (249 mg, 0.83 mmol), EDC.HCl (287 mg, 1.50 mmol), Et<sub>3</sub>N (0.21 mL, 1.50 mmol) and **D-S20** (229 mg, 1.00 mmol) according to **General Procedure F**. Crude **S45** was purified by

automatic purification system (99:1 DCM:MeOH increasing to 9:1) to give the pure product (260 mg, 0.51 mmol, 61%).  $R_f$  0.21 (19:1 DCM:MeOH);  $m.p.$  209-210 °C;  $\delta_H$  (500 MHz, CDCl<sub>3</sub>) 7.52 (1H, s, CONH) 7.25 (1H, d,  $J = 4.6$ , NHCH<sub>3</sub>), 7.03 (1H, s, CONH), 6.89 (1H, s, CONH), 6.24 (1H, s, CONH), 2.77 (3H, d,  $J = 4.6$ , NHCH<sub>3</sub>), 2.12 (1H, sep,  $J = 6.9$ , CH(CH<sub>3</sub>)<sub>2</sub>), 1.54 (3H, s, NHC(CH<sub>3</sub>)<sub>2</sub>), 1.52 (3H, s, NHC(CH<sub>3</sub>)<sub>2</sub>), 1.48 (3H, s, NHC(CH<sub>3</sub>)<sub>2</sub>), 1.48 (3H, s, NHC(CH<sub>3</sub>)<sub>2</sub>), 1.47 (3H, s, NHC(CH<sub>3</sub>)<sub>2</sub>), 1.46 (3H, s, NHC(CH<sub>3</sub>)<sub>2</sub>), 1.45 (3H, s, N<sub>3</sub>C(CH<sub>3</sub>)<sub>2</sub>), 1.44 (3H, s, N<sub>3</sub>C(CH<sub>3</sub>)<sub>2</sub>), 1.36 (3H, s, NHC(CH<sub>3</sub>)), 0.97 (3H, d,  $J = 6.9$ , CH(CH<sub>3</sub>)<sub>2</sub>), 0.94 (3H, d,  $J = 6.9$ , CH(CH<sub>3</sub>)<sub>2</sub>);  $\delta_c$  (125 MHz, CDCl<sub>3</sub>); 175.1 (CONH), 174.2 (CONH), 174.1 (CONH), 173.2 (CONH), 172.8 (CONH), 64.1 (NHC(CH<sub>3</sub>)), 63.4 (N<sub>3</sub>C(CH<sub>3</sub>)<sub>2</sub>), 57.3 (NHC(CH<sub>3</sub>)<sub>2</sub>), 57.1 (NHC(CH<sub>3</sub>)<sub>2</sub>), 56.8 (NHC(CH<sub>3</sub>)<sub>2</sub>), 35.8 (CH(CH<sub>3</sub>)<sub>2</sub>), 27.3 (NHCH<sub>3</sub>), 27.2 (N<sub>3</sub>C(CH<sub>3</sub>)<sub>2</sub>), 26.5 (NHC(CH<sub>3</sub>)<sub>2</sub>), 26.2 (NHC(CH<sub>3</sub>)<sub>2</sub>), 24.5 (NHC(CH<sub>3</sub>)<sub>2</sub>), 24.3 (N<sub>3</sub>C(CH<sub>3</sub>)<sub>2</sub>), 23.7 (NHC(CH<sub>3</sub>)<sub>2</sub>), 23.5 (NHC(CH<sub>3</sub>)<sub>2</sub>), 23.4 (NHC(CH<sub>3</sub>)<sub>2</sub>), 17.9 (NHC(CH<sub>3</sub>)), 17.7 (CH(CH<sub>3</sub>)<sub>2</sub>), 17.2 (CH(CH<sub>3</sub>)<sub>2</sub>);  $\nu_{\max}/\text{cm}^{-1}$  3325m.br (N-H), 2982w (C-H), 2113m (N<sub>3</sub>), 1661s (C=O), 1526m (C-N);  $m/z$  (ESI<sup>+</sup>) 533.3 ([M+Na]<sup>+</sup>, 100%), HRMS (ESI<sup>+</sup>) found [M+H]<sup>+</sup> 511.3345 [C<sub>23</sub>H<sub>43</sub>N<sub>8</sub>O<sub>5</sub>]<sup>+</sup> requires 511.3351;  $[\alpha]_{\text{D}}^{20} = -24.0$  (c 1.00; CH<sub>3</sub>OH).

### H-Aib<sub>4</sub>-D- $\alpha$ Mv-NHMe – S46

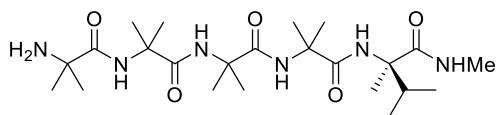

From **S45** (260 mg, 0.51 mmol) according to **General Procedure B**. **S46** was obtained as a white solid (247 mg, 0.51 mmol, *quant.*).  $R_f$  0.05 (19:1 DCM:MeOH); **m.p.** 185-

186 °C;  $\delta_H$  (400 MHz, CD<sub>3</sub>OD) 2.76 (3H, d,  $J = 4.1$ , NHCH<sub>3</sub>), 2.16 (1H, sep,  $J = 6.8$ , CH(CH<sub>3</sub>)<sub>2</sub>), 1.49 (3H, s, H<sub>2</sub>NC(CH<sub>3</sub>)<sub>2</sub>), 1.46 (3H, s, H<sub>2</sub>NC(CH<sub>3</sub>)<sub>2</sub>), 1.45 (3H, s, NHC(CH<sub>3</sub>)<sub>2</sub>), 1.45 (3H, s, NHC(CH<sub>3</sub>)<sub>2</sub>), 1.44 (3H, s, NHC(CH<sub>3</sub>)<sub>2</sub>), 1.42 (3H, s, NHC(CH<sub>3</sub>)<sub>2</sub>), 1.38 (3H, s, NHC(CH<sub>3</sub>)<sub>2</sub>), 1.37 (6H, s, NHC(CH<sub>3</sub>)<sub>2</sub>, NHC(CH<sub>3</sub>)<sub>2</sub>), 1.04 (3H, d,  $J = 6.8$ , CH(CH<sub>3</sub>)<sub>2</sub>), 0.96 (3H, d,  $J = 6.8$ , CH(CH<sub>3</sub>)<sub>2</sub>);  $\delta_C$  (100 MHz, CD<sub>3</sub>OD); 179.3 (CONH), 177.3 (CONH), 177.0 (CONH), 177.0 (CONH), 176.1 (CONH), 64.5 (NHC(CH<sub>3</sub>)<sub>2</sub>), 58.3 (NHC(CH<sub>3</sub>)<sub>2</sub>), 58.1 (NHC(CH<sub>3</sub>)<sub>2</sub>), 57.5 (NHC(CH<sub>3</sub>)<sub>2</sub>), 55.9 (H<sub>2</sub>NC(CH<sub>3</sub>)<sub>2</sub>), 36.9 (CH(CH<sub>3</sub>)<sub>2</sub>), 28.3 (H<sub>2</sub>C(CH<sub>3</sub>)<sub>2</sub>), 27.8 (H<sub>2</sub>C(CH<sub>3</sub>)<sub>2</sub>), 27.4 (NHCH<sub>3</sub>), 27.0 (NHC(CH<sub>3</sub>)<sub>2</sub>), 26.5 (NHC(CH<sub>3</sub>)<sub>2</sub>), 26.0 (NHC(CH<sub>3</sub>)<sub>2</sub>), 24.0 (NHC(CH<sub>3</sub>)<sub>2</sub>), 23.8 (NHC(CH<sub>3</sub>)<sub>2</sub>), 23.7 (NHC(CH<sub>3</sub>)<sub>2</sub>), 18.4 (NHC(CH<sub>3</sub>)<sub>2</sub>), 17.7 (CH(CH<sub>3</sub>)<sub>2</sub>), 17.4 (CH(CH<sub>3</sub>)<sub>2</sub>);  $\nu_{max}/cm^{-1}$  3315m.br (N-H), 2982w (C-H), 1655s (C=O), 1526m (C-N);  $m/z$  (ESI<sup>+</sup>) 485.3 ([M+H]<sup>+</sup>, 100%), 507.3 ([M+Na]<sup>+</sup>, 60%), HRMS (ESI<sup>+</sup>) found [M+Na]<sup>+</sup> 507.3269 [C<sub>23</sub>H<sub>44</sub>N<sub>6</sub>O<sub>5</sub>Na]<sup>+</sup> requires 507.3269;  $[\alpha]_D^{20} = -19.0$  ( $c$  1.00; CH<sub>3</sub>OH).

#### (S)-2-amino-2-methylpropanoic-3-<sup>13</sup>C acid hydrobromide – S47

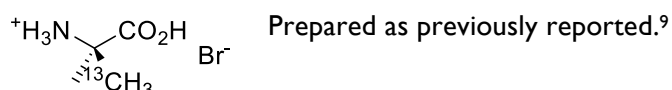

#### (S)-2-azido-2-methylpropanoic-3-<sup>13</sup>C acid – S48

According to the procedure of Lee:<sup>10</sup> To a stirred solution of NaN<sub>3</sub> (2.05 g, 31.5 mmol) in water (5.25 mL) and DCM (8.75 mL) at 0 °C was added trifluoromethanesulfonic anhydride over 5 min. The reaction was stirred for a further 2 h. The reaction mixture was separated, and the aqueous further extracted with DCM (2 × 4.7 mL). The combined organic layers were washed with sat. aq. NaHCO<sub>3</sub> (15 mL). The resultant solution of trifluoromethanesulfonyl azide in DCM was never allowed to evaporate to dryness, but added as soon as possible to a stirred solution of **S47** (580 mg, 3.13 mmol), K<sub>2</sub>CO<sub>3</sub> (1.09 g, 7.89 mmol) and CuSO<sub>4</sub> (80 mg, 0.32 mmol) in water (10.5 mL) and MeOH (20.5 mL). The reaction was stirred overnight then diluted with water (60 mL), acidified to pH 6 with conc. HCl and further diluted with phosphate buffer (250 mM, pH 6.2, 120 mL). This was then washed with EtOAc (4 × 50 mL). The aqueous was acidified to pH 1 with further conc. HCl and extracted with EtOAc (3 × 50 mL). The organic solvent was removed *in vacuo* to give **S48** as a yellow oil (241 mg, 1.85 mmol, 59%).  $R_f$  0.29 (19:1 DCM:MeOH);  $\delta_H$  (500 MHz, CDCl<sub>3</sub>) 11.09 (1H, s, br, CO<sub>2</sub>H), 1.53 (3H, d,  $J = 129.9$ , NHC(CH<sub>3</sub>)(<sup>13</sup>CH<sub>3</sub>)), 1.53 (3H, d,  $J = 4.4$ , NHC(CH<sub>3</sub>)(<sup>13</sup>CH<sub>3</sub>));  $\delta_C$  (125 MHz, CDCl<sub>3</sub>) 179.2 (CO<sub>2</sub>H), 63.0 (d,  $J = 37.6$ , NHC(CH<sub>3</sub>)(<sup>13</sup>CH<sub>3</sub>)), 24.4 (NHC(CH<sub>3</sub>)(<sup>13</sup>CH<sub>3</sub>));  $\nu_{max}/cm^{-1}$  2986m.br (O-H), 2093s (N<sub>3</sub>), 1714m

(C=O), 1470m (C-O);  $m/z$  (ESI<sup>-</sup>) 129.0 ([M-H]<sup>-</sup>, 100%), HRMS (ESI<sup>-</sup>) found [M-H]<sup>-</sup> 129.0498 [C<sub>3</sub><sup>13</sup>CH<sub>6</sub>N<sub>3</sub>O<sub>2</sub>]<sup>+</sup> requires 129.0499.

### N<sub>3</sub>-Aib\*-Aib<sub>4</sub>-D-αMv-NHMe – S49

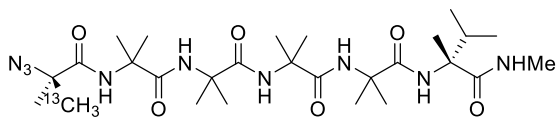

From **S48** (30 mg, 0.23 mmol), oxalyl chloride (30 μL, 0.35 mmol), **S46** (186 mg, 0.38 mmol) and Et<sub>3</sub>N (45 μL, 0.38 mmol) according to **General Procedure A**. Crude

**S49** was purified by flash column chromatography (99:1 DCM:MeOH increasing to 19:1) to give the pure compound as a white solid (75 mg, 0.13 mmol, 57%).  $R_f$  0.19 (19:1 DCM:MeOH); **m.p.** 250-251 °C;  $\delta_H$  (400 MHz, CDCl<sub>3</sub>) 7.62 (1H, s, CONH), 7.40 (1H, s, CONH), 7.32 (1H, d,  $J$  = 5.0, NHCH<sub>3</sub>), 7.03 (1H, s, CONH), 6.93 (1H, s, CONH), 6.31 (1H, s, CONH), 2.79 (3H, d,  $J$  = 4.7, NHCH<sub>3</sub>), 2.15 (1H, sep,  $J$  = 6.6, CH(CH<sub>3</sub>)<sub>2</sub>), 1.72-1.36 (6H, m, N<sub>3</sub>C(CH<sub>3</sub>)(<sup>13</sup>CH<sub>3</sub>), 1.56-1.52 (3H, m, NHC(CH<sub>3</sub>)<sub>2</sub>), 1.50 (3H, s, NHC(CH<sub>3</sub>)<sub>2</sub>), 1.49 (3H, s, NHC(CH<sub>3</sub>)<sub>2</sub>), 1.48 (3H, s, NHC(CH<sub>3</sub>)<sub>2</sub>), 1.47 (3H, s, NHC(CH<sub>3</sub>)<sub>2</sub>), 1.47 (3H, s, NHC(CH<sub>3</sub>)<sub>2</sub>), 1.45 (3H, s, NHC(CH<sub>3</sub>)<sub>2</sub>), 1.44 (6H, s, NHC(CH<sub>3</sub>)<sub>2</sub>, NHC(CH<sub>3</sub>)), 0.99 (3H, d,  $J$  = 6.6, CH(CH<sub>3</sub>)<sub>2</sub>), 0.95 (3H, d,  $J$  = 6.6, CH(CH<sub>3</sub>)<sub>2</sub>);  $\delta_C$  (100 MHz, CDCl<sub>3</sub>) 175.3 (CONH), 175.3 (CONH), 174.3 (CONH), 173.5 (CONH), 173.3 (CONH), 173.2 (CONH), 64.1 (d,  $J$  = 36.8, N<sub>3</sub>C(CH<sub>3</sub>)(<sup>13</sup>CH<sub>3</sub>)), 63.4 (NHC(CH<sub>3</sub>)), 57.2 (NHC(CH<sub>3</sub>)<sub>2</sub>), 57.0 (NHC(CH<sub>3</sub>)<sub>2</sub>), 57.0 (NHC(CH<sub>3</sub>)<sub>2</sub>), 56.9 (NHC(CH<sub>3</sub>)<sub>2</sub>), 35.8 (CH(CH<sub>3</sub>)<sub>2</sub>), 27.4 (NHC(CH<sub>3</sub>)<sub>2</sub>), 27.2 (NHCH<sub>3</sub>), 26.8 (NHC(CH<sub>3</sub>)<sub>2</sub>), 26.5 (NHC(CH<sub>3</sub>)<sub>2</sub>), 26.1 (NHC(CH<sub>3</sub>)<sub>2</sub>), 24.5 (N<sub>3</sub>C(<sup>13</sup>CH<sub>3</sub>)(CH<sub>3</sub>)<sub>minor</sub>), 24.4 (N<sub>3</sub>C(CH<sub>3</sub>)(<sup>13</sup>CH<sub>3</sub>)<sub>major</sub>), 23.8 (NHC(CH<sub>3</sub>)<sub>2</sub>), 23.6 (NHC(CH<sub>3</sub>)<sub>2</sub>), 23.5 (NHC(CH<sub>3</sub>)<sub>2</sub>), 17.8 (NHC(CH<sub>3</sub>)), 17.8 (CH(CH<sub>3</sub>)<sub>2</sub>), 17.3 (CH(CH<sub>3</sub>)<sub>2</sub>);  $\nu_{max}/cm^{-1}$  3317m.br (N-H), 2984w (C-H), 2113m (N<sub>3</sub>), 1656s (C=O), 1521m (C-N);  $m/z$  (ESI<sup>+</sup>) 619.4 ([M+Na]<sup>+</sup>, 100%), HRMS (ESI<sup>+</sup>) found [M+Na]<sup>+</sup> 619.3732 [C<sub>26</sub><sup>1</sup>H<sub>49</sub>N<sub>9</sub>O<sub>6</sub>Na]<sup>+</sup> requires 619.3732;  $[\alpha]_D^{20}$  = -4.0 (c 1.00; CH<sub>3</sub>OH).

### H-Aib\*-Aib<sub>4</sub>-D-αMv-NHMe – S50

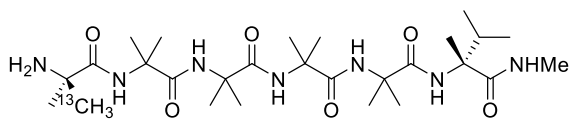

From **S49** (75 mg, 0.13 mmol) according to **General Procedure B**. **S50** was obtained as a white solid (58 mg, 0.10 mg, 77%).  $R_f$  0.12 (19:1 DCM:MeOH); **m.p.** 229-

230 °C;  $\delta_H$  (400 MHz, CD<sub>3</sub>OD) 2.74 (3H, s, NHCH<sub>3</sub>), 2.13 (1H, sep,  $J$  = 6.7, CH(CH<sub>3</sub>)<sub>2</sub>), 1.66-1.30 (3H, m, H<sub>2</sub>NC(CH<sub>3</sub>)(<sup>13</sup>CH<sub>3</sub>), 1.48 (3H, s, H<sub>2</sub>NC(CH<sub>3</sub>)(<sup>13</sup>CH<sub>3</sub>), 1.46 (12H, s, NHC(CH<sub>3</sub>)<sub>2</sub>), 1.44 (3H, s, NHC(CH<sub>3</sub>)<sub>2</sub>), 1.42 (3H, s, NHC(CH<sub>3</sub>)<sub>2</sub>), 1.42 (3H, s, NHC(CH<sub>3</sub>)<sub>2</sub>), 1.40 (3H, s, NHC(CH<sub>3</sub>)<sub>2</sub>), 1.40 (3H, s, NHC(CH<sub>3</sub>)), 1.01 (3H, d,  $J$  = 6.7, CH(CH<sub>3</sub>)<sub>2</sub>), 0.94 (3H, d,  $J$  = 6.7, CH(CH<sub>3</sub>)<sub>2</sub>);  $\delta_C$  (100 MHz, CD<sub>3</sub>OD) 177.8 (CONH), 177.3 (CONH), 177.3 (CONH), 177.0 (CONH), 176.5 (CONH), 176.3 (CONH), 64.6 (NHC(CH<sub>3</sub>)), 58.1 (NHC(CH<sub>3</sub>)<sub>2</sub>), 58.0 (H<sub>2</sub>NC(<sup>13</sup>CH<sub>3</sub>)(CH<sub>3</sub>)), 57.8 (NHC(CH<sub>3</sub>)<sub>2</sub>), 57.8 (NHC(CH<sub>3</sub>)<sub>2</sub>), 57.8 (NHC(CH<sub>3</sub>)<sub>2</sub>), 36.9 (CH(CH<sub>3</sub>)<sub>2</sub>), 27.4 (NHC(CH<sub>3</sub>)<sub>2</sub>), 27.2 (NHCH<sub>3</sub>), 27.0 (NHC(CH<sub>3</sub>)<sub>2</sub>), 26.6 (H<sub>2</sub>NC(CH<sub>3</sub>)(<sup>13</sup>CH<sub>3</sub>)<sub>major</sub>), 26.4 (NHC(<sup>13</sup>CH<sub>3</sub>)(CH<sub>3</sub>)<sub>minor</sub>), 25.8 (NHC(CH<sub>3</sub>)<sub>2</sub>), 25.6 (NHC(CH<sub>3</sub>)<sub>2</sub>), 24.5 (NHC(CH<sub>3</sub>)<sub>2</sub>), 23.9 (NHC(CH<sub>3</sub>)<sub>2</sub>),

23.8 (NHC(CH<sub>3</sub>)<sub>2</sub>), 23.3 (NHC(CH<sub>3</sub>)<sub>2</sub>), 18.3 (NHC(CH<sub>3</sub>)), 17.7 (CH(CH<sub>3</sub>)<sub>2</sub>), 17.5 (CH(CH<sub>3</sub>)<sub>2</sub>);  $\nu_{\max}/\text{cm}^{-1}$  3314m.br (N-H), 2982w (C-H), 1653s (C=O), 1526m (C-N);  $m/z$  (ESI<sup>+</sup>) 593.4 ([M+Na]<sup>+</sup>, 100%), HRMS (ESI<sup>+</sup>) found [M+Na]<sup>+</sup> 593.3824 [C<sub>26</sub><sup>13</sup>CH<sub>51</sub>N<sub>7</sub>O<sub>6</sub>Na]<sup>+</sup> requires 593.3827;  $[\alpha]_{\text{D}}^{20} = -32.0$  (c 1.00; CH<sub>3</sub>OH).

### Cbz-L- $\alpha$ Mv-Aib<sub>2</sub>-Aib\*-Aib<sub>4</sub>-D- $\alpha$ Mv-NHMe – 6a

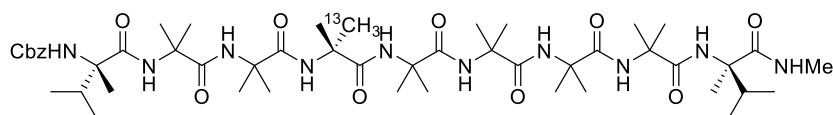

From **S43** (53 mg, 0.12 mmol), EDC.HCl (35 mg, 0.18 mmol), Et<sub>3</sub>N (26  $\mu$ L, 0.18 mmol) and **S50**

(58 mg, 0.10 mmol) according to **General Procedure F**. Crude **6a** was purified by automatic purification system (99:1 DCM:MeOH increasing to 9:1) to give the pure product as a white solid (54 mg, 0.05 mmol, 50%).  $R_f$  0.18 (19:1 DCM:MeOH);  $m.p.$  >250 °C;  $\delta_{\text{H}}$  (500 MHz, CDCl<sub>3</sub>) 7.75 (1H, s, CONH) 7.72 (1H, s, CONH), 7.69 (1H, s, CONH), 7.66 (1H, s, CONH), 7.62 (1H, s, CONH), 7.49 (1H, s, CONH), 7.39-7.30 (6H, m, PhH, CONH), 7.08 (1H, s, CONH), 6.71 (1H, s, CONH), 5.86 (1H, s, CONH), 5.09 (2H, ABq,  $\Delta\delta_{\text{AB}} = 0.04$ ,  $J_{\text{AB}} = 11.7$ , PhCH<sub>2</sub>), 2.78 (3H, d,  $J = 4.6$ , NHCH<sub>3</sub>), 2.33 (1H, m, CH(CH<sub>3</sub>)<sub>2</sub>), 2.17 (1H, m, CH(CH<sub>3</sub>)<sub>2</sub>), 1.51 (9H, s, NHC(CH<sub>3</sub>)<sub>2</sub>), 1.48 (9H, s, NHC(CH<sub>3</sub>)<sub>2</sub>), 1.48 (6H, s, NHC(CH<sub>3</sub>)<sub>2</sub>), 1.46 (7H, s, NHC(CH<sub>3</sub>)<sub>2</sub>, NHC(<sup>13</sup>CH<sub>3</sub>)) (CH<sub>3</sub>)<sub>minor</sub>), 1.46 (2H, d,  $J = 125.4$ , NHC(CH<sub>3</sub>)(<sup>13</sup>CH<sub>3</sub>)<sub>major</sub>), 1.43 (3H, s, NHC(CH<sub>3</sub>)<sub>2</sub>), 1.42 (3H, s, NHC(CH<sub>3</sub>)<sub>2</sub>), 1.41 (2H, s, NHC(CH<sub>3</sub>)(<sup>13</sup>CH<sub>3</sub>)<sub>major</sub>), 1.41 (1H, d,  $J = 125.4$ , NHC(<sup>13</sup>CH<sub>3</sub>)(CH<sub>3</sub>)<sub>minor</sub>), 1.41 (3H, s, NHC(CH<sub>3</sub>)), 1.34 (3H, s, NH(CH<sub>3</sub>)), 1.00-0.91 (12H, m, CH(CH<sub>3</sub>)<sub>2</sub>);  $\delta_{\text{C}}$  (125 MHz, CDCl<sub>3</sub>); 176.3 (CONH), 175.9 (CONH), 175.8 (CONH), 175.8 (CONH), 175.6 (CONH), 175.5 (CONH), 174.7 (CONH), 174.5 (CONH), 173.8 (CONH), 156.3 (CO<sub>2</sub>Bn), 136.1, 128.9, 128.7, 128.2 (Ar), 67.5 (PhCH<sub>2</sub>), 63.1 (NHC(CH<sub>3</sub>)), 62.8 (NHC(CH<sub>3</sub>)), 57.3 (NHC(CH<sub>3</sub>)<sub>2</sub>), 56.9 (NHC(CH<sub>3</sub>)<sub>2</sub>), 56.9 (NHC(CH<sub>3</sub>)<sub>2</sub>), 56.9 (NHC(CH<sub>3</sub>)<sub>2</sub>), 56.8 (NHC(CH<sub>3</sub>)<sub>2</sub>), 56.7 (NHC(CH<sub>3</sub>)<sub>2</sub>), 56.6 (NHC(CH<sub>3</sub>)<sub>2</sub>), 34.8-34.6 (CH(CH<sub>3</sub>)<sub>2</sub>), 26.9 (NHC(CH<sub>3</sub>)<sub>2</sub>), 26.5 (NHCH<sub>3</sub>), 26.2 (NHC(CH<sub>3</sub>)<sub>2</sub>), 25.8-24.1 (NHC(CH<sub>3</sub>)<sub>2</sub>, NHC(<sup>13</sup>CH<sub>3</sub>)), 18.4 (NHC(CH<sub>3</sub>)), 18.0 (NHC(CH<sub>3</sub>)), 17.9 (CH(CH<sub>3</sub>)<sub>2</sub>), 17.8 (CH(CH<sub>3</sub>)<sub>2</sub>), 17.7 (CH(CH<sub>3</sub>)<sub>2</sub>), 17.5 (CH(CH<sub>3</sub>)<sub>2</sub>);  $\nu_{\max}/\text{cm}^{-1}$  3293m.br (N-H), 2981w (C-H), 1656s (C=O), 1534m (C-N);  $m/z$  (ESI<sup>+</sup>) 1010.6 ([M+Na]<sup>+</sup>, 100%), HRMS (ESI<sup>+</sup>) found [M+Na]<sup>+</sup> 1010.6070 [C<sub>48</sub><sup>13</sup>CH<sub>82</sub>N<sub>10</sub>O<sub>11</sub>Na]<sup>+</sup> requires 1010.6090;  $[\alpha]_{\text{D}}^{21.5} = -0.2$  (c 0.25; CH<sub>3</sub>OH).

### N<sub>3</sub>-Aib\*(50%)-Aib-D- $\alpha$ Mv-NHMe – S51

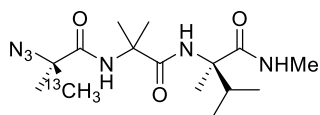

From **S48** (73 mg, 0.56 mg) and **S6** (72 mg, 0.56 mmol), oxalyl chloride (0.10 mL, 1.22 mmol), **D-S20** (254 mg, 1.11 mmol) and Et<sub>3</sub>N (0.16 mL, 1.11 mmol) according to **General Procedure A**. Crude **S51** was purified by

flash column chromatography (99:1 DCM:MeOH increasing to 19:1) to give the pure compound as a white solid (217 mg, 0.64 mmol, 57%).  $R_f$  0.53 (19:1 DCM:MeOH);  $m.p.$  125-127 °C;  $\delta_{\text{H}}$  (400 MHz, CDCl<sub>3</sub>) 7.13 (1H, d,  $J = 4.5$ , NHCH<sub>3</sub>), 7.06 (1H, s, CONH), 6.22 (1H, s, CONH), 2.71 (3H, d,  $J = 4.5$ , NHCH<sub>3</sub>), 2.10 (1H,

sep,  $J = 6.9$ ,  $\text{CH}(\text{CH}_3)_2$ ), 1.51 (3H, s,  $\text{NHC}(\text{CH}_3)_2$ ), 1.47 (7.5H, s,  $\text{NHC}(\text{CH}_3)_2$ ,  $\text{NHC}(\text{CH}_3)$ ,  $\text{N}_3\text{C}(\text{CH}_3)_2$ ), 1.47 (1.5H, d,  $J = 129.7$ ,  $\text{N}_3\text{C}(\text{CH}_3)_2(\text{CH}_3)$ ), 1.43 (3H, s,  $\text{N}_3(\text{CH}_3)_2(\text{CH}_3)$ ,  $\text{N}_3\text{C}(\text{CH}_3)_2$ ), 0.86 (3H, d,  $J = 6.9$ ,  $\text{CH}(\text{CH}_3)_2$ ), 0.81 (3H, d,  $J = 6.9$ ,  $\text{CH}(\text{CH}_3)_2$ );  $\delta_{\text{C}}$  (100 MHz,  $\text{CDCl}_3$ ) 173.5 (CONH), 173.0 (CONH), 172.5 (CONH), 64.0 ( $\text{N}_3\text{C}(\text{CH}_3)_2$ ), 64.0 (d,  $J = 36.7$ ,  $\text{N}_3\text{C}(\text{CH}_3)_2(\text{CH}_3)$ ), 63.0 ( $\text{NHC}(\text{CH}_3)$ ), 57.4 ( $\text{NHC}(\text{CH}_3)_2$ ), 35.6 ( $\text{CH}(\text{CH}_3)_2$ ), 26.3 ( $\text{NHCH}_3$ ), 24.2 ( $\text{N}_3\text{C}(\text{CH}_3)_2(\text{CH}_3)$ ), 24.0 ( $\text{NHC}(\text{CH}_3)_2$ ), 19.7 ( $\text{NHC}(\text{CH}_3)$ ) 17.4 ( $\text{CH}(\text{CH}_3)_2$ ), 16.7 ( $\text{CH}(\text{CH}_3)_2$ );  $\nu_{\text{max}}/\text{cm}^{-1}$  3358m.br (N-H), 2973m (C-H), 2110s ( $\text{N}_3$ ), 1651s (C=O), 1500s (C-N);  $m/z$  (ESI<sup>+</sup>) 341.2 and 342.2 ( $[\text{M}+\text{Na}]^+$ , 100%), HRMS (ESI<sup>+</sup>) found  $[\text{M}+\text{Na}]^+$  363.2133 and 364.2147  $[\text{C}_{15}\text{H}_{28}\text{N}_6\text{O}_3\text{Na}]^+$  and  $[\text{C}_{14}^{13}\text{CH}_{28}\text{N}_6\text{O}_3\text{Na}]^+$  require 363.2121 and 364.2154;  $[\alpha]_{\text{D}}^{20} = -16.8$  (c 1.10;  $\text{CH}_3\text{OH}$ ).

### H-Aib\*(50%)-Aib-D- $\alpha$ Mv-NHMe – S52

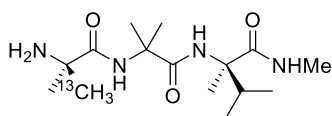

From **S51** (80 mg, 0.24 mmol) according to **General Procedure B. S52** was obtained as a clear film (77 mg, 0.24 mmol, *quant.*).  $R_f$  0.05 (EtOAc); **m.p.** 203-205 °C;  $\delta_{\text{H}}$  (400 MHz,  $\text{CD}_3\text{OD}$ ) 2.83-2.80 (3H, m,  $\text{NHCH}_3$ ), 2.11

(1H, sep,  $J = 6.7$ ,  $\text{CH}(\text{CH}_3)_2$ ), 1.57 (3H, s,  $\text{NHC}(\text{CH}_3)_2$ ), 1.55 (3H, s,  $\text{NHC}(\text{CH}_3)_2$ ), 1.51 (3H, s,  $\text{NHC}(\text{CH}_3)$ ), 1.41 (4.5H, s,  $\text{H}_2\text{NC}(\text{CH}_3)_2$ ,  $\text{H}_2\text{NC}(\text{CH}_3)_2(\text{CH}_3)$ ), 1.41 (3H, d,  $J = 129.4$ ,  $\text{H}_2\text{NC}(\text{CH}_3)_2(\text{CH}_3)$ ), 1.03-1.01 (3H, m,  $\text{CH}(\text{CH}_3)_2$ ), 1.01-0.99 (3H, m,  $\text{CH}(\text{CH}_3)_2$ );  $\delta_{\text{C}}$  (100 MHz,  $\text{CD}_3\text{OD}$ ) 180.5 (CONH), 175.7 (CONH), 175.7 (CONH), 64.1 ( $\text{NHC}(\text{CH}_3)$ ), 57.9 ( $\text{NHC}(\text{CH}_3)_2$ ), 55.7 ( $\text{H}_2\text{NC}(\text{CH}_3)_2$ ), 55.7 (d,  $J = 36.7$ ,  $\text{H}_2\text{NC}(\text{CH}_3)_2(\text{CH}_3)$ ), 36.9 ( $\text{CH}(\text{CH}_3)_2$ ), 28.6 ( $\text{H}_2\text{NC}(\text{CH}_3)_2(\text{CH}_3)$ ,  $\text{H}_2\text{NC}(\text{CH}_3)_2$ ), 28.4 ( $\text{H}_2\text{NC}(\text{CH}_3)_2(\text{CH}_3)$ ,  $\text{H}_2\text{NC}(\text{CH}_3)_2$ ), 26.5 ( $\text{NHCH}_3$ ), 26.0 ( $\text{NHC}(\text{CH}_3)_2$ ), 24.3 ( $\text{NHC}(\text{CH}_3)_2$ ), 19.6 ( $\text{NHC}(\text{CH}_3)$ ) 17.7 ( $\text{CH}(\text{CH}_3)_2$ ), 17.8 ( $\text{CH}(\text{CH}_3)_2$ );  $\nu_{\text{max}}/\text{cm}^{-1}$  3351m.br (N-H), 2930m (C-H), 1645s (C=O), 1503m (C-N);  $m/z$  (ESI<sup>+</sup>) 315.2 and 316.3 ( $[\text{M}+\text{H}]^+$ , 100%), HRMS (ESI<sup>+</sup>) found  $[\text{M}+\text{Na}]^+$  337.2206 and 338.2235  $[\text{C}_{15}\text{H}_{30}\text{N}_4\text{O}_3\text{Na}]^+$  and  $[\text{C}_{14}^{13}\text{CH}_{30}\text{N}_4\text{O}_3\text{Na}]^+$  require 337.2216 and 338.2249;  $[\alpha]_{\text{D}}^{20} = -19.2$  (c 1.00;  $\text{CH}_3\text{OH}$ ).

### N<sub>3</sub>-Aib-Aib\*(50%)-Aib-D- $\alpha$ Mv-NHMe – S53

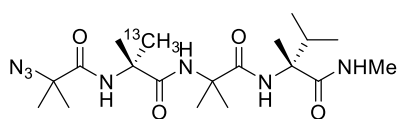

From **S6** (48 mg, 0.37 mmol), oxalyl chloride (0.03 mL, 0.38 mmol), **S52** (77 mg, 0.24 mmol) and  $\text{Et}_3\text{N}$  (0.05 mL, 0.37 mmol) according to **General Procedure A**. Crude **S53** was purified by flash column

chromatography (99:1 DCM:MeOH increasing to 19:1) to give the pure compound as a white solid (47 mg, 0.11 mmol, 45%).  $R_f$  0.38 (19:1 DCM:MeOH); **m.p.** 131-133 °C;  $\delta_{\text{H}}$  (500 MHz,  $\text{CDCl}_3$ ) 7.11 (1H, d,  $J = 4.4$ ,  $\text{NHCH}_3$ ), 6.88 (1H, s, CONH), 6.76 (1H, s, CONH), 6.39 (1H, s, CONH), 2.77 (3H, d,  $J = 4.4$ ,  $\text{NHCH}_3$ ), 2.14 (1H, sep,  $J = 6.2$ ,  $\text{CH}(\text{CH}_3)_2$ ), 1.53 (3H, m,  $\text{NHC}(\text{CH}_3)_2$ ), 1.52 (3H, s,  $\text{NHC}(\text{CH}_3)_2$ ), 1.51-1.48 (4.5H, m,  $\text{NHC}(\text{CH}_3)_2$ ,  $\text{NHC}(\text{CH}_3)_2(\text{CH}_3)$ ), 1.49 (1.5H, d,  $J = 129.1$ ,  $\text{NHC}(\text{CH}_3)_2(\text{CH}_3)$ ), 1.47 (3H, m,  $\text{NHC}(\text{CH}_3)$ ), 1.45 ( $\text{N}_3\text{C}(\text{CH}_3)_2$ ), 1.39 ( $\text{N}_3\text{C}(\text{CH}_3)_2$ ), 0.94 (3H, d,  $J = 6.2$ ,  $\text{CH}(\text{CH}_3)_2$ ), 0.92 (3H, d,  $J = 6.2$ ,  $\text{CH}(\text{CH}_3)_2$ );  $\delta_{\text{C}}$  (125 MHz,  $\text{CDCl}_3$ ) 174.7 (CONH), 173.6 (CONH), 172.9 (CONH), 172.8 (CONH), 64.2 ( $\text{N}_3\text{C}(\text{CH}_3)_2$ ), 63.5

(NHC(CH<sub>3</sub>)), 57.3 (NHC(CH<sub>3</sub>)<sub>2</sub>), 57.2 (NHC(CH<sub>3</sub>)<sub>2</sub>) 57.2 (d, *J* = 36.2, N<sub>3</sub>C(<sup>13</sup>CH<sub>3</sub>)(CH<sub>3</sub>)), 35.5 (CH(CH<sub>3</sub>)<sub>2</sub>), 27.3 (NHC(CH<sub>3</sub>)<sub>2</sub>), 26.5 (NHCH<sub>3</sub>), 26.1 (N<sub>3</sub>C(<sup>13</sup>CH<sub>3</sub>)<sub>major</sub>), 24.6 (N<sub>3</sub>C(CH<sub>3</sub>)<sub>2</sub>), 24.3 (N<sub>3</sub>C(CH<sub>3</sub>)<sub>2</sub>), 23.9 (NHC(<sup>13</sup>CH<sub>3</sub>)<sub>minor</sub>), 23.8 (NHC(CH<sub>3</sub>)<sub>2</sub>), 17.9 (NHC(CH<sub>3</sub>)) 17.6 (CH(CH<sub>3</sub>)<sub>2</sub>), 17.2 (CH(CH<sub>3</sub>)<sub>2</sub>);  $\nu_{\max}/\text{cm}^{-1}$  3315m (N-H), 2977m (C-H), 2126m (N<sub>3</sub>), 1652s (C=O), 1517m (C-N); *m/z* (ESI<sup>+</sup>) 448.3 and 449.3 ([M+Na]<sup>+</sup>, 100%), HRMS (ESI<sup>+</sup>) found [M+Na]<sup>+</sup> 448.2647 and 449.2686 [C<sub>20</sub>H<sub>35</sub>N<sub>7</sub>O<sub>4</sub>Na]<sup>+</sup> and [C<sub>19</sub><sup>13</sup>CH<sub>35</sub>N<sub>7</sub>O<sub>4</sub>Na]<sup>+</sup> require 448.2648 and 449.2682;  $[\alpha]_{\text{D}}^{20} = -23.6$  (c 1.00; CH<sub>3</sub>OH).

#### H-Aib-Aib\*(50%)-Aib-D- $\alpha$ Mv-NHMe – S54

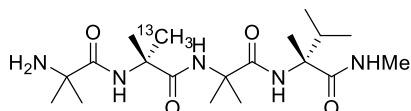

From **S53** (98 mg, 0.23 mmol) according to **General Procedure B**.

**S54** was obtained as a clear film (81 mg, 0.20 mmol, 87%). *R<sub>f</sub>* 0.01 (19:1 DCM:MeOH); *m.p.* 203-205 °C;  $\delta_{\text{H}}$  (500 MHz, CDCl<sub>3</sub>) 8.16 (1H, s, CONH), 7.17 (1H, d, *J* = 4.5, NHCH<sub>3</sub>), 6.96 (1H, s, CONH), 6.68 (1H, s, CONH), 2.77 (3H, d, *J* = 4.5, NHCH<sub>3</sub>), 2.15 (1H, sep, *J* = 6.8, CH(CH<sub>3</sub>)<sub>2</sub>), 1.70 (2H, s, br, NH<sub>2</sub>), 1.48 (3H, s, NHC(CH<sub>3</sub>)<sub>2</sub>), NHC(<sup>13</sup>CH<sub>3</sub>)(CH<sub>3</sub>), 1.47 (3H, s, NHC(CH<sub>3</sub>)<sub>2</sub>), 1.46 (1.5H, s, NHC(CH<sub>3</sub>)<sub>2</sub>), 1.46 (1.5H, d, *J* = 128.9, NHC(<sup>13</sup>CH<sub>3</sub>)(CH<sub>3</sub>)), 1.43 (3H, s, NHC(CH<sub>3</sub>)<sub>2</sub>), 1.37 (3H, s, NHC(CH<sub>3</sub>)), 1.36 (3H, s, H<sub>2</sub>NC(CH<sub>3</sub>)<sub>2</sub>), 1.34 (3H, s, H<sub>2</sub>NC(CH<sub>3</sub>)<sub>2</sub>), 0.94 (3H, d, *J* = 6.8, CH(CH<sub>3</sub>)<sub>2</sub>), 0.92 (3H, d, *J* = 6.8, CH(CH<sub>3</sub>)<sub>2</sub>);  $\delta_{\text{C}}$  (100 MHz, CDCl<sub>3</sub>) 178.5 (CONH), 174.9 (CONH), 174.3 (CONH), 173.2 (CONH), 63.5 (NHC(CH<sub>3</sub>)), 57.1 (NHC(CH<sub>3</sub>)<sub>2</sub>), 56.7 (NHC(CH<sub>3</sub>)<sub>2</sub>), 56.7 (d, *J* = 36.3, NHC(<sup>13</sup>CH<sub>3</sub>)(CH<sub>3</sub>)), 55.0 (H<sub>2</sub>NC(CH<sub>3</sub>)<sub>2</sub>), 35.6 (CH(CH<sub>3</sub>)<sub>2</sub>), 29.2 (H<sub>2</sub>NC(CH<sub>3</sub>)<sub>2</sub>), 28.9 (NHC(CH<sub>3</sub>)<sub>2</sub>), 27.4 (H<sub>2</sub>NC(CH<sub>3</sub>)<sub>2</sub>), 26.5 (NHC(CH<sub>3</sub>)<sub>2</sub>), 26.4 (NHCH<sub>3</sub>), 26.3 (NHC(<sup>13</sup>CH<sub>3</sub>)<sub>major</sub>), 24.0 (NHC(<sup>13</sup>CH<sub>3</sub>)<sub>major</sub>), 17.9 (NHC(CH<sub>3</sub>)) 17.7 (CH(CH<sub>3</sub>)<sub>2</sub>), 17.3 (CH(CH<sub>3</sub>)<sub>2</sub>);  $\nu_{\max}/\text{cm}^{-1}$  3317m (N-H), 2967w (C-H), 1646s (C=O), 1525m (C-N); *m/z* (ESI<sup>+</sup>) 400.4 and 401.4 ([M+Na]<sup>+</sup>, 100%), HRMS (ESI<sup>+</sup>) found [M+Na]<sup>+</sup> 422.2748 and 423.2775 [C<sub>19</sub>H<sub>37</sub>N<sub>5</sub>O<sub>4</sub>Na]<sup>+</sup> and [C<sub>18</sub><sup>13</sup>CH<sub>37</sub>N<sub>5</sub>O<sub>4</sub>Na]<sup>+</sup> require 422.2743 and 423.2777;  $[\alpha]_{\text{D}}^{20} = -17.2$  (c 1.00; CH<sub>3</sub>OH).

#### N<sub>3</sub>-Aib\*-Aib-Aib\*(50%)-Aib-D- $\alpha$ Mv-NHMe – S55

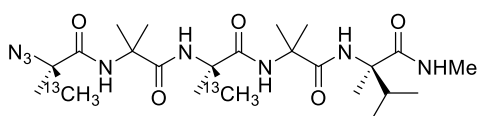

From **S48** (22 mg, 0.17 mmol), oxalyl chloride (15  $\mu$ L, 0.18 mmol), **S54** (44 mg, 0.11 mmol) and Et<sub>3</sub>N (24  $\mu$ L, 0.17 mmol) according to **General Procedure A**. Crude **S55**

was purified by flash column chromatography (99:1 DCM:MeOH increasing to 19:1) to give the pure compound as a white solid (17 mg, 0.03 mmol, 30%). *R<sub>f</sub>* 0.14 (19:1 DCM:MeOH); *m.p.* 163-165 °C;  $\delta_{\text{H}}$  (500 MHz, CDCl<sub>3</sub>) 7.50 (1H, s, CONH), 7.26 (1H, s, br, CONH), 6.95 (1H, s, CONH), 6.86 (1H, s, CONH), 6.15 (1H, s, CONH), 2.79 (3H, d, *J* = 4.7, NHCH<sub>3</sub>), 2.13 (1H, sep, *J* = 6.8, CH(CH<sub>3</sub>)<sub>2</sub>), 1.68-1.52 (5.5H, m, NHC(<sup>13</sup>CH<sub>3</sub>)(CH<sub>3</sub>)<sub>major</sub>, NHC(<sup>13</sup>CH<sub>3</sub>)(CH<sub>3</sub>)<sub>minor</sub>, NHC(CH<sub>3</sub>)<sub>2</sub>), 1.51-1.44 (17.5H, NHC(CH<sub>3</sub>)<sub>2</sub>, N<sub>3</sub>C(<sup>13</sup>CH<sub>3</sub>)(CH<sub>3</sub>)<sub>major</sub>, N<sub>3</sub>(<sup>13</sup>CH<sub>3</sub>)(CH<sub>3</sub>)<sub>minor</sub>, NHC(<sup>13</sup>CH<sub>3</sub>)(CH<sub>3</sub>)<sub>major</sub>, NHC(<sup>13</sup>CH<sub>3</sub>)(CH<sub>3</sub>)<sub>minor</sub>, NHC(<sup>13</sup>CH<sub>3</sub>)(CH<sub>3</sub>), N<sub>3</sub>(<sup>13</sup>CH<sub>3</sub>)(CH<sub>3</sub>)), 1.43-1.34 (4H, m, NHC(CH<sub>3</sub>), N<sub>3</sub>C(<sup>13</sup>CH<sub>3</sub>)(CH<sub>3</sub>)<sub>major</sub>,



$N_3(^{13}CH_3)(CH_3)_{\text{minor}}$ , 0.97 (3H, d,  $J = 6.8$ ,  $CH(CH_3)_2$ ), 0.95 (3H, d,  $J = 6.8$ ,  $CH(CH_3)_2$ );  $\delta_c$  (125 MHz,  $CDCl_3$ ) 175.1 (CONH), 174.1 (CONH), 174.1 (CONH), 173.3 (CONH), 172.7 (CONH), 64.1 (d,  $J = 36.7$ ,  $N_3C(CH_3)_2$ ), 63.5 (NHC( $CH_3$ )), 57.4 (NHC( $CH_3$ ) $_2$ ), 57.2 (NHC( $CH_3$ ) $_2$ ), 56.8 (0.5, d,  $J = 35.3$ , NHC( $^{13}CH_3$ )( $CH_3$ )), 56.8 (0.5, NHC( $CH_3$ )( $CH_3$ )), 35.8 ( $CH(CH_3)_2$ ), 27.3 (NHC( $^{13}CH_3$ )( $CH_3$ ) $_{\text{minor}}$ ), 26.5 (NHCH $_3$ ), 26.3 (NHC( $CH_3$ ) $_2$ ), 25.3 (NHC( $CH_3$ ) $_2$ ), 24.6 ( $N_3C(^{13}CH_3)(CH_3)_{\text{minor}}$ ), 24.3 ( $N_3C(^{13}CH_3)(CH_3)_{\text{major}}$ ), 23.8 (NHC( $CH_3$ ) $_2$ ), 23.6 (NHC( $CH_3$ ) $_2$ ), 23.5 (NHC( $^{13}CH_3$ )( $CH_3$ ) $_{\text{minor}}$ ), 18.1 (NHC( $CH_3$ )) 17.7 ( $CH(CH_3)_2$ ), 17.2 ( $CH(CH_3)_2$ );  $\nu_{\text{max}}/\text{cm}^{-1}$  3331 m.br (N-H), 2976 l (C-H), 2112 s ( $N_3$ ), 1656 s (C=O), 1526 m (C-N);  $m/z$  (ESI $^+$ ) 512.5 and 513.5 ( $[M+H]^+$ , 100%), HRMS (ESI $^+$ ) found  $[M+Na]^+$  534.3212 and 535.3246  $[C_{22}^{13}CH_{42}N_8O_5Na]^+$  and  $[C_{21}^{13}C_2H_{41}N_8O_5Na]^+$  require 534.3209 and 535.3243;  $[\alpha]_D^{20} = -19.2$  (c 0.50;  $CH_3OH$ ).

#### H-Aib\*-Aib-Aib\*(50%)-Aib-D- $\alpha$ Mv-NHMe – S56

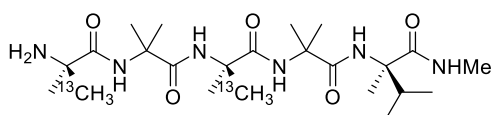

From **S55** (17 mg, 0.03 mmol) according to **General Procedure B**. **S56** was obtained as a clear film (16 mg, 0.03 mmol, *quant.*).  $R_f$  0.12 (19:1 DCM:MeOH); **m.p.** 125-

127 °C;  $\delta_H$  (400 MHz,  $CD_3OD$ ) 2.75 (3H, m, NHCH $_3$ ), 2.15 (1H, sep,  $J = 6.5$ ,  $CH(CH_3)_2$ ), 1.55-1.34 (24H, m, NHC( $CH_3$ ) $_2$ , NHC( $^{13}CH_3$ )( $CH_3$ ), NHC( $^{13}CH_3$ )( $CH_3$ )), 1.48 (3H, s, NHC( $CH_3$ ) $_2$ ), 1.48 (1.22-1.17 (3H, m, NHC( $CH_3$ )), 1.04 (3H, d,  $J = 6.6$ ,  $CH(CH_3)_2$ ), 0.96 (3H, d,  $J = 6.6$ ,  $CH(CH_3)_2$ );  $\delta_c$  (100 MHz,  $CDCl_3$ ) 179.7 (CONH), 177.3 (CONH), 177.1 (CONH), 177.0 (CONH), 176.2 (CONH), 64.6 (NHC( $CH_3$ )), 58.1 (NHC( $CH_3$ ) $_2$ ), 57.5 (0.5, d,  $J = 35.2$ , NHC( $^{13}CH_3$ )( $CH_3$ )), 57.5 (0.5, NHC( $CH_3$ )( $CH_3$ ), 57.5 (NHC( $CH_3$ ) $_2$ ), 55.7 (d,  $J = 36.4$  (NHC( $^{13}CH_3$ )( $CH_3$ )), 36.9 ( $CH(CH_3)_2$ ), 28.5 ( $H_2NC(^{13}CH_3)(CH_3)_{\text{minor}}$ ), 28.3 (NHC( $^{13}CH_3$ )( $CH_3$ ) $_{\text{major}}$ ), 27.2 (NHC( $CH_3$ ) $_2$ ), 26.5 (NHCH $_3$ ), 25.8 (NHC( $CH_3$ ) $_2$ ), 25.3 (NHC( $CH_3$ ) $_2$ ), 26.9 ( $H_2NC(^{13}CH_3)(CH_3)_{\text{minor}}$ ), 24.1 (NHC( $CH_3$ ) $_2$ ), 23.7 (NHC( $^{13}CH_3$ )( $CH_3$ ) $_{\text{minor}}$ ), 18.3 (NHC( $CH_3$ )) 17.7 ( $CH(CH_3)_2$ ), 17.4 ( $CH(CH_3)_2$ );  $\nu_{\text{max}}/\text{cm}^{-1}$  3326 w.br (N-H), 2978 w (C-H), 1652 m (C=O), 1623 s (C=O), 1417 m (C-N);  $m/z$  (ES $^-$ ) 485.4 and 486.4 ( $[M]^-$ , 100%), HRMS (ESI $^+$ ) found  $[M+Na]^+$  508.3305 and 509.3330  $[C_{22}^{13}CH_{44}N_6O_5Na]^+$  and  $[C_{21}^{13}C_2H_{44}N_6O_5Na]^+$  require 508.3304 and 509.3338;  $[\alpha]_D^{20} = -9.3$  (c 1.00;  $CH_3OH$ ).

#### Cbz-L- $\alpha$ Mv-Aib $_3$ -Aib\*-Aib\*(50%)-Aib-D- $\alpha$ Mv-NHMe – 6b

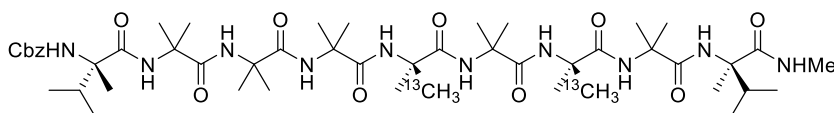

From **S30** (105 mg, 0.20 mmol), EDC.HCl (57 mg, 0.30 mmol),  $Et_3N$  (42  $\mu$ L, 0.30 mmol) and **S56**

NHMe (98 mg, 0.20 mmol) according to **General Procedure F**. Crude **6b** was purified by automatic purification system (99:1 DCM:MeOH increasing to 9:1) to give the pure compound as a white solid (153 mg, 0.15 mmol, 75%).  $R_f$  0.22 (19:1 DCM:MeOH); **m.p.** >250 °C;  $\delta_H$  (500 MHz,  $CDCl_3$ ) 7.79 (1H, br,

s, CONH), 7.73 (1H, br, s, CONH), 7.71 (1H, br, s, CONH), 7.68 (1H, br, s, CONH), 7.63 (1H, br, s, CONH), 7.51 (1H, br, s, CONH), 7.38 – 7.30 (6H, m, CONH, PhH), 7.12 (1H, br, s, CONH), 6.86 (1H, br, s, CONH), 6.11 (1H, br, s, CONH), 5.11 (1H, d,  $J = 12.5$ , PhCH<sub>2</sub>), 5.08 (1H, d,  $J = 12.5$ , PhCH<sub>2</sub>), 2.77 (3H, d,  $J = 4.5$ , NHCH<sub>3</sub>), 2.38-2.28 (1H, m, CH(CH<sub>3</sub>)<sub>2</sub>), 2.20 (1H, sep,  $J = 7.0$ , CH(CH<sub>3</sub>)<sub>2</sub>), 1.51 (7.5H, m, NHC(CH<sub>3</sub>)<sub>2</sub>, NHC(CH<sub>3</sub>)<sub>2</sub>(unlabelled) (50%)), 1.51 (1.5H, d,  $J = 129.5$ , NHC(CH<sub>3</sub>)(<sup>13</sup>CH<sub>3</sub>) NHC(CH<sub>3</sub>)(<sup>13</sup>CH<sub>3</sub>) (50%)), 1.49 (9H, m, NHC(CH<sub>3</sub>)<sub>2</sub>), 1.48 (3H, d,  $J = 129.5$ , NHC(CH<sub>3</sub>)(<sup>13</sup>CH<sub>3</sub>), NHC(<sup>13</sup>CH<sub>3</sub>)(CH<sub>3</sub>) (100%)), 1.48 (3H, m, NHC(CH<sub>3</sub>)(<sup>13</sup>CH<sub>3</sub>), NHC(<sup>13</sup>CH<sub>3</sub>)(CH<sub>3</sub>) (100%)), 1.47 (6H, m, NHC(CH<sub>3</sub>)<sub>2</sub>), 1.46 (3H, s, NHC(CH<sub>3</sub>)<sub>2</sub>), 1.43 (3H, s, NHC(CH<sub>3</sub>)<sub>2</sub>), 1.42 (3H, s, NHC(CH<sub>3</sub>)<sub>2</sub>), 1.42 (3H, s, NHC(CH<sub>3</sub>)<sub>2</sub>), 1.41 (3H, s, NHC(CH<sub>3</sub>)<sub>2</sub>), 1.36 (3H, s, NHC(CH<sub>3</sub>)<sub>2</sub>), 1.00 – 0.94 (12H, m, CH(CH<sub>3</sub>)<sub>2</sub>);  $\delta_c$  (125 MHz, CDCl<sub>3</sub>) 176.2 (CONH), 175.9 (CONH), 175.8 (CONH), 175.7 (CONH), 175.6 (CONH), 175.5 (CONH), 174.7 (CONH), 174.6 (CONH), 174.2 (CONH), 156.3 (CO<sub>2</sub>Bn), 136.3, 128.6, 128.4, 127.9 (Ar), 67.0 (PhCH<sub>2</sub>), 62.9 (NHC(CH<sub>3</sub>)), 62.6 (NHC(CH<sub>3</sub>)), 57.1 (NHC(CH<sub>3</sub>)<sub>2</sub>), 56.7 (NHC(CH<sub>3</sub>)<sub>2</sub>), 56.7 (NHC(CH<sub>3</sub>)<sub>2</sub>), 56.7 (NHC(CH<sub>3</sub>)<sub>2</sub>), 56.6 (0.5, d,  $J = 37.0$ , NHC(CH<sub>3</sub>)(<sup>13</sup>CH<sub>3</sub>)), 56.6 (0.5, NHC(CH<sub>3</sub>)(CH<sub>3</sub>)), 56.6 (NHC(CH<sub>3</sub>)<sub>2</sub>), 56.5 (d,  $J = 37.5$ , NHC(CH<sub>3</sub>)(<sup>13</sup>CH<sub>3</sub>)), 34.6 (CH(CH<sub>3</sub>)<sub>2</sub>), 34.2 (CH(CH<sub>3</sub>)<sub>2</sub>), 27.1 (NHC(CH<sub>3</sub>)<sub>2</sub>), 26.9 (NHC(CH<sub>3</sub>)<sub>2</sub>), 26.3 (NHCH<sub>3</sub>), 26.1 (NHC(CH<sub>3</sub>)<sub>2</sub>), 25.3 (NHC(CH<sub>3</sub>)(<sup>13</sup>CH<sub>3</sub>), NHC(CH<sub>3</sub>)(CH<sub>3</sub>)), 24.9 (NHC(CH<sub>3</sub>)(<sup>13</sup>CH<sub>3</sub>)), 22.7 (NHC(CH<sub>3</sub>)<sub>2</sub>), 17.8 (CH(CH<sub>3</sub>)<sub>2</sub>), 17.6 (CH(CH<sub>3</sub>)<sub>2</sub>), 17.6 (CH(CH<sub>3</sub>)<sub>2</sub>), 17.4 (CH(CH<sub>3</sub>)<sub>2</sub>);  $\nu_{max}/cm^{-1}$  3294m.br (N-H), 2984m (C-H), 1655s (C=O), 1533m (C-N);  $m/z$  (ESI<sup>+</sup>) 1010.6 and 1011.6 ([M+Na]<sup>+</sup>, 100%), HRMS (ESI<sup>+</sup>) found [M+Na]<sup>+</sup> 1010.6085 and 1011.6114 [C<sub>48</sub><sup>13</sup>CH<sub>82</sub>N<sub>10</sub>O<sub>11</sub>Na] and [C<sub>47</sub><sup>13</sup>C<sub>2</sub>H<sub>82</sub>N<sub>10</sub>O<sub>11</sub>Na] require 1010.6090 and 1011.6124;  $[\alpha]_D^{20} = -0.7$  (c 1.00; CH<sub>3</sub>OH).

### N<sub>3</sub>-Aib<sub>2</sub>-D- $\alpha$ Mv-NHMe – S57

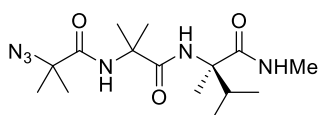

From **S6** (262 mg, 2.03 mmol), oxalyl chloride (0.55 mL, 2.03 mmol), **D-S20** (310 mg, 1.35 mmol) and Et<sub>3</sub>N (0.29 mL, 2.03 mmol) according to **General Procedure A**. Crude **S57** was purified by flash column chromatography (99:1 DCM:MeOH increasing to 19:1) to give the pure compound as a white solid (168 mg, 0.49 mmol, 36%).  $R_f$  0.53 (19:1 DCM:MeOH); **m.p.** 125-127 °C;  $\delta_H$  (500 MHz, CDCl<sub>3</sub>) 7.07 (1H, d,  $J = 4.5$ , NHCH<sub>3</sub>), 6.95 (1H, s, CONH), 6.21 (1H, s, CONH), 2.72 (3H, d,  $J = 4.5$ , NHCH<sub>3</sub>), 2.12 (1H, sep,  $J = 6.9$ , CH(CH<sub>3</sub>)<sub>2</sub>), 1.50 (3H, s, NHC(CH<sub>3</sub>)<sub>2</sub>), 1.47 (6H, s, NHC(CH<sub>3</sub>)<sub>2</sub>, NHC(CH<sub>3</sub>)), 1.47 (3H, s, N<sub>3</sub>C(CH<sub>3</sub>)<sub>2</sub>), 1.43 (3H, s, N<sub>3</sub>C(CH<sub>3</sub>)<sub>2</sub>), 0.86 (3H, d,  $J = 6.9$ , CH(CH<sub>3</sub>)<sub>2</sub>), 0.82 (3H, d,  $J = 6.9$ , CH(CH<sub>3</sub>)<sub>2</sub>);  $\delta_c$  (125 MHz, CDCl<sub>3</sub>) 173.7 (CONH), 173.1 (CONH), 172.6 (CONH), 64.1 (N<sub>3</sub>C(CH<sub>3</sub>)<sub>2</sub>), 63.3 (NHC(CH<sub>3</sub>)), 57.5 (NHC(CH<sub>3</sub>)<sub>2</sub>), 35.6 (CH(CH<sub>3</sub>)<sub>2</sub>), 26.4 (NHCH<sub>3</sub>), 25.8 (N<sub>3</sub>C(CH<sub>3</sub>)<sub>2</sub>), 24.3 (NHC(CH<sub>3</sub>)<sub>2</sub>), 19.7 (NHC(CH<sub>3</sub>)) 17.4 (CH(CH<sub>3</sub>)<sub>2</sub>), 16.8 (CH(CH<sub>3</sub>)<sub>2</sub>);  $\nu_{max}/cm^{-1}$  3353m.br (N-H), 2978m (C-H), 2111s (N<sub>3</sub>), 1652s (C=O), 1502s (C-N);  $m/z$  (ESI<sup>+</sup>) 341.2 ([M+H]<sup>+</sup>, 100%), HRMS (ESI<sup>+</sup>) found [M+H]<sup>+</sup> 341.2317 [C<sub>15</sub>H<sub>29</sub>N<sub>6</sub>O<sub>3</sub>]<sup>+</sup> requires 341.2301;  $[\alpha]_D^{20} = -16.8$  (c 1.10; CH<sub>3</sub>OH).

### H-Aib<sub>2</sub>-D- $\alpha$ Mv-NHMe – S58

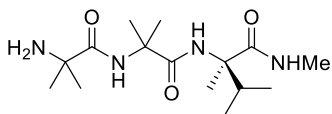

From **S57** (168 mg, 0.49 mmol) according to **General Procedure B. S58** was obtained as a clear film (116 mg, 0.37 mmol, 76%).  $R_f$  0.05 (EtOAc); **m.p.** 203-205 °C;  $\delta_H$  (400 MHz, CDCl<sub>3</sub>) 8.22 (1H, s, CONH), 7.36 (1H, d,  $J$  = 4.6, CONH), 6.29 (1H, s, CONH), 2.76 (3H, d,  $J$  = 4.6, NHCH<sub>3</sub>), 2.13 (1H, sep,  $J$  = 6.9, CH(CH<sub>3</sub>)<sub>2</sub>), 1.78 (2H, s, br, NH<sub>2</sub>), 1.54 (3H, s, NHC(CH<sub>3</sub>)<sub>2</sub>), 1.49 (3H, s, NHC(CH<sub>3</sub>)<sub>2</sub>), 1.46 (3H, s, NHC(CH<sub>3</sub>)), 1.34 (6H, s, H<sub>2</sub>NC(CH<sub>3</sub>)<sub>2</sub>), 0.90 (3H, d,  $J$  = 6.9, CH(CH<sub>3</sub>)<sub>2</sub>), 0.85 (3H, d,  $J$  = 6.9, CH(CH<sub>3</sub>)<sub>2</sub>);  $\delta_C$  (100 MHz, CDCl<sub>3</sub>) 178.8 (CONH), 173.9 (CONH), 173.3 (CONH), 63.2 (NHC(CH<sub>3</sub>)), 57.0 (NHC(CH<sub>3</sub>)<sub>2</sub>), 55.0 (H<sub>2</sub>NC(CH<sub>3</sub>)<sub>2</sub>), 35.8 (CH(CH<sub>3</sub>)<sub>2</sub>), 29.1 (H<sub>2</sub>NC(CH<sub>3</sub>)<sub>2</sub>), 28.9 (H<sub>2</sub>NC(CH<sub>3</sub>)<sub>2</sub>), 26.5 (NHCH<sub>3</sub>), 26.2 (NHC(CH<sub>3</sub>)<sub>2</sub>), 24.3 (NHC(CH<sub>3</sub>)<sub>2</sub>), 20.0 (NHC(CH<sub>3</sub>)) 17.6 (CH(CH<sub>3</sub>)<sub>2</sub>), 16.8 (CH(CH<sub>3</sub>)<sub>2</sub>);  $\nu_{max}/cm^{-1}$  3329m.br (N-H), 2967m (C-H), 1649s (C=O), 1503m (C-N);  $m/z$  (ESI<sup>+</sup>) 315.2 ([M+H]<sup>+</sup>, 100%), HRMS (ESI<sup>+</sup>) found [M+Na]<sup>+</sup> 337.2221 [C<sub>15</sub>H<sub>30</sub>N<sub>4</sub>O<sub>3</sub>Na]<sup>+</sup> requires 337.2216;  $[\alpha]_D^{20}$  = -16.4 (c 1.00; CH<sub>3</sub>OH).

### N<sub>3</sub>-Aib\*-Aib<sub>2</sub>-D- $\alpha$ Mv-NHMe – S59

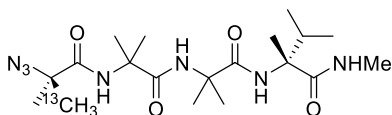

From **S48** (48 mg, 0.37 mmol), oxalyl chloride (34  $\mu$ L, 0.41 mmol), **S58** (92 mg, 0.29 mmol) and Et<sub>3</sub>N (57  $\mu$ L, 0.41 mmol) according to **General Procedure A**. Crude **S59** was purified by flash column chromatography (99:1 DCM:MeOH increasing to 19:1) to give the pure compound as a white solid (30 mg, 0.07 mmol, 24%).  $R_f$  0.38 (19:1 DCM:MeOH); **m.p.** 130-132 °C;  $\delta_H$  (500 MHz, CDCl<sub>3</sub>) 7.14 (1H, d,  $J$  = 4.6, NHCH<sub>3</sub>), 6.91 (1H, s, CONH), 6.78 (1H, s, CONH), 6.41 (1H, s, CONH), 2.77 (3H, d,  $J$  = 4.6, NHCH<sub>3</sub>), 2.13 (1H, sep,  $J$  = 6.8, CH(CH<sub>3</sub>)<sub>2</sub>), 1.54-1.47 (12H, m, NHC(CH<sub>3</sub>)<sub>2</sub>), 1.46 (3H, s, NHC(CH<sub>3</sub>)<sub>2</sub>), 1.44 (3H, s, NHC(CH<sub>3</sub>)), 1.41-1.33 (6H, m, N<sub>3</sub>C(CH<sub>3</sub>)), 0.93 (3H, d,  $J$  = 6.8, CH(CH<sub>3</sub>)<sub>2</sub>), 0.92 (3H, d,  $J$  = 6.8, CH(CH<sub>3</sub>)<sub>2</sub>);  $\delta_C$  (125 MHz, CDCl<sub>3</sub>) 174.7 (CONH), 173.6 (CONH), 172.9 (CONH), 172.8 (CONH), 64.2 (d,  $J$  = 37.1, N<sub>3</sub>C(CH<sub>3</sub>)<sub>2</sub>), 63.5 (NHC(CH<sub>3</sub>)), 57.3 (NHC(CH<sub>3</sub>)<sub>2</sub>), 57.2 (NHC(CH<sub>3</sub>)<sub>2</sub>), 35.5 (CH(CH<sub>3</sub>)<sub>2</sub>), 27.3 (NHC(CH<sub>3</sub>)<sub>2</sub>), 26.5 (NHCH<sub>3</sub>), 26.1 (NHC(CH<sub>3</sub>)<sub>2</sub>), 24.6 (N<sub>3</sub>C(<sup>13</sup>CH<sub>3</sub>)<sub>minor</sub>), 24.3 (N<sub>3</sub>C(<sup>13</sup>CH<sub>3</sub>)<sub>major</sub>), 23.9 (NHC(CH<sub>3</sub>)<sub>2</sub>), 23.7 (NHC(CH<sub>3</sub>)<sub>2</sub>), 17.9 (NHC(CH<sub>3</sub>)) 17.6 (CH(CH<sub>3</sub>)<sub>2</sub>), 17.2 (CH(CH<sub>3</sub>)<sub>2</sub>);  $\nu_{max}/cm^{-1}$  3336m.br (N-H), 2977m (C-H), 2113m (N<sub>3</sub>), 1659s (C=O), 1514s (C-N);  $m/z$  (ESI<sup>+</sup>) 427.3 ([M+H]<sup>+</sup>, 100%), HRMS (ESI<sup>+</sup>) found [M+Na]<sup>+</sup> 449.2676 [C<sub>18</sub><sup>13</sup>CH<sub>35</sub>N<sub>7</sub>O<sub>4</sub>Na]<sup>+</sup> requires 449.2682;  $[\alpha]_D^{20}$  = -12.4 (c 1.10; CH<sub>3</sub>OH).

### H-Aib\*-Aib<sub>2</sub>-D- $\alpha$ Mv-NHMe – S60

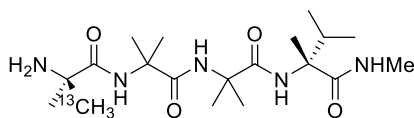

From **S59** (25 mg, 0.06 mmol) according to **General Procedure B**.

**S60** was obtained as a clear film (23 mg, 0.06 mmol, *quant.*).  $R_f$  0.00 (19:1 DCM:MeOH); **m.p.** 203-205 °C;  $\delta_H$  (400 MHz, CD<sub>3</sub>OD) 2.65

(3H, s, NHCH<sub>3</sub>), 2.09 (1H, sep,  $J$  = 6.8, CH(CH<sub>3</sub>)<sub>2</sub>), 1.36 (3H, s, NHC(CH<sub>3</sub>)<sub>2</sub>), 1.34 (3H, s, NHC(CH<sub>3</sub>)<sub>2</sub>), 1.31 (3H, s, NHC(CH<sub>3</sub>)<sub>2</sub>), 1.30 (3H, s, NHC(CH<sub>3</sub>)<sub>2</sub>), 1.26 (3H, s, NHC(CH<sub>3</sub>)), 1.26-1.21 (3H, m, H<sub>2</sub>NC(CH<sub>3</sub>)<sub>2</sub>), 1.11-1.06 (3H, m, H<sub>2</sub>NC(CH<sub>3</sub>)<sub>2</sub>), 0.92 (3H, d,  $J$  = 6.8, CH(CH<sub>3</sub>)<sub>2</sub>), 0.83 (3H, d,  $J$  = 6.8, CH(CH<sub>3</sub>)<sub>2</sub>);  $\delta_C$  (100 MHz, CD<sub>3</sub>OD) 179.6 (CONH), 177.4 (CONH), 177.0 (CONH), 176.6 (CONH), 64.5 (NHC(CH<sub>3</sub>)), 57.9 (NHC(CH<sub>3</sub>)<sub>2</sub>), 57.3 (NHC(CH<sub>3</sub>)<sub>2</sub>), 55.8 (d,  $J$  = 36.5, H<sub>2</sub>NC(CH<sub>3</sub>)<sub>2</sub>), 36.6 (CH(CH<sub>3</sub>)<sub>2</sub>), 28.7 (H<sub>2</sub>NC(<sup>13</sup>CH<sub>3</sub>))<sub>major</sub>, 28.4 (NHC(CH<sub>3</sub>)<sub>2</sub>), 28.1 (H<sub>2</sub>NC(<sup>13</sup>CH<sub>3</sub>))<sub>minor</sub>, 27.2 (NHC(CH<sub>3</sub>)<sub>2</sub>), 26.4 (NHCH<sub>3</sub>), 25.5 (NHC(CH<sub>3</sub>)<sub>2</sub>), 25.0 (NHC(CH<sub>3</sub>)<sub>2</sub>), 18.4 (NHC(CH<sub>3</sub>)) 17.8 (CH(CH<sub>3</sub>)<sub>2</sub>), 16.8 (CH(CH<sub>3</sub>)<sub>2</sub>);  $\nu_{max}/cm^{-1}$  3339w.br (N-H), 2973w (C-H), 1649s (C=O), 1413m (C-N);  $m/z$  (ESI<sup>+</sup>) 423.8 ([M+Na]<sup>+</sup>, 100%), 401.3 ([M+H]<sup>+</sup>, 60%), HRMS (ESI<sup>+</sup>) found [M+Na]<sup>+</sup> 423.2756 [C<sub>18</sub><sup>13</sup>CH<sub>37</sub>N<sub>5</sub>O<sub>4</sub>Na]<sup>+</sup> requires 423.2777;  $[\alpha]_D^{20}$  = -2.4 (c 0.50; CH<sub>3</sub>OH).

#### **Cbz-L- $\alpha$ Mv-Aib<sub>4</sub>-Aib\*-Aib<sub>2</sub>-D- $\alpha$ Mv-NHMe – 6c**

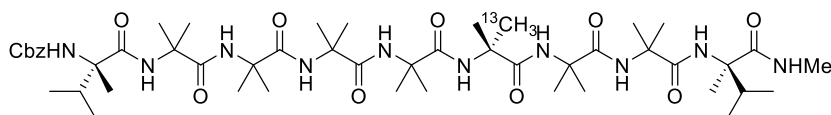

From **S37** (38 mg, 0.06 mmol),

EDC.HCl (18 mg, 0.09 mmol),

DIPEA (16  $\mu$ L, 0.09 mmol) and **S60**

(23 mg, 0.06 mmol) according to **General Procedure F**. Crude **6c** was purified by flash column chromatography (99:1 DCM:MeOH increasing to 19:1) to give the pure compound as a clear solid (10 mg, 0.01 mmol, 17%).  $R_f$  0.17 (19:1 DCM:MeOH); **m.p.** >250 °C;  $\delta_H$  (500 MHz, CDCl<sub>3</sub>) 7.72-7.70 (2H, m, CONH) 7.68 (1H, s, CONH), 7.63 (1H, s, CONH), 7.60 (1H, s, CONH), 7.48 (1H, s, CONH), 7.39-7.32 (6H, m, PhH, CONH), 7.06 (1H, s, CONH), 6.54 (1H, s, CONH), 5.59 (1H, s, CONH), 5.03 (2H, ABq,  $\Delta\delta_{AB}$  = 0.03,  $J_{AB}$  = 12.3, PhCH<sub>2</sub>), 2.79 (3H, d,  $J$  = 4.6, NHCH<sub>3</sub>), 2.34 (1H, m, CH(CH<sub>3</sub>)<sub>2</sub>), 2.13 (1H, m, CH(CH<sub>3</sub>)<sub>2</sub>), 1.52-1.50 (9H, m, NHC(CH<sub>3</sub>)<sub>2</sub>), 1.49 (6H, s, NHC(CH<sub>3</sub>)<sub>2</sub>), 1.47 (12H, s, NHC(CH<sub>3</sub>)<sub>2</sub>), 1.46 (6H, s, NHC(CH<sub>3</sub>)<sub>2</sub>), 1.44 (3H, s, NHC(CH<sub>3</sub>)<sub>2</sub>), 1.43 (3H, s, NHC(CH<sub>3</sub>)<sub>2</sub>), 1.41 (6H, s, NHC(CH<sub>3</sub>)<sub>2</sub>, NHC(CH<sub>3</sub>)), 1.33 (3H, s, NH(CH<sub>3</sub>)), 0.99 (3H, d,  $J$  = 7.2, CH(CH<sub>3</sub>)<sub>2</sub>), 0.97 (3H, d,  $J$  = 7.2, CH(CH<sub>3</sub>)<sub>2</sub>), 0.96 (3H, d,  $J$  = 6.4, CH(CH<sub>3</sub>)<sub>2</sub>), 0.95 (3H, d,  $J$  = 6.4, CH(CH<sub>3</sub>)<sub>2</sub>);  $\delta_C$  (125 MHz, CDCl<sub>3</sub>); 176.2 (CONH), 175.8 (CONH), 175.7 (CONH), 175.5 (CONH), 175.4 (CONH), 174.6 (CONH), 174.4 (CONH), 173.6 (CONH), 156.3 (CO<sub>2</sub>Bn), 136.0, 128.9, 128.8, 128.2 (Ar), 67.6 (PhCH<sub>2</sub>), 63.0 (NHC(CH<sub>3</sub>)), 62.8 (NHC(CH<sub>3</sub>)), 57.2 (NHC(CH<sub>3</sub>)<sub>2</sub>), 56.9 (NHC(CH<sub>3</sub>)<sub>2</sub>), 56.9 (NHC(CH<sub>3</sub>)<sub>2</sub>), 56.7 (NHC(CH<sub>3</sub>)<sub>2</sub>), 56.7 (NHC(CH<sub>3</sub>)<sub>2</sub>), 56.6 (NHC(CH<sub>3</sub>)<sub>2</sub>), 56.6 (NHC(CH<sub>3</sub>)<sub>2</sub>), 30.5 (CH(CH<sub>3</sub>)<sub>2</sub>), 29.9 (CH(CH<sub>3</sub>)<sub>2</sub>), 26.9 (NHC(CH<sub>3</sub>)<sub>2</sub>), 26.5 (NHCH<sub>3</sub>), 26.4 (NHC(CH<sub>3</sub>)<sub>2</sub>), 25.6-24.6 (NHC(CH<sub>3</sub>)<sub>2</sub>, NHC(<sup>13</sup>CH<sub>3</sub>)), 18.5 (NHC(CH<sub>3</sub>)), 18.0 (NHC(CH<sub>3</sub>)), 18.0 (CH(CH<sub>3</sub>)<sub>2</sub>), 17.8 (CH(CH<sub>3</sub>)<sub>2</sub>), 17.6 (CH(CH<sub>3</sub>)<sub>2</sub>), 17.4 (CH(CH<sub>3</sub>)<sub>2</sub>);  $\nu_{max}/cm^{-1}$  3292m.br (N-H), 3984w

(C-H), 1655s (C=O), 1535m (C-N); *m/z* (ESI<sup>+</sup>) 1010.7 ([M+Na]<sup>+</sup>, 100%), HRMS (ESI<sup>-</sup>) found [M-H]<sup>-</sup> 986.6080 [C<sub>48</sub><sup>13</sup>CH<sub>81</sub>N<sub>10</sub>O<sub>11</sub>]<sup>-</sup> requires 986.6120; [α]<sub>D</sub><sup>20</sup> = -0.4 (c 1.00; CH<sub>3</sub>OH).

## 2. NMR Spectra

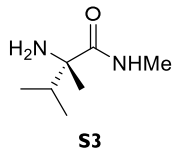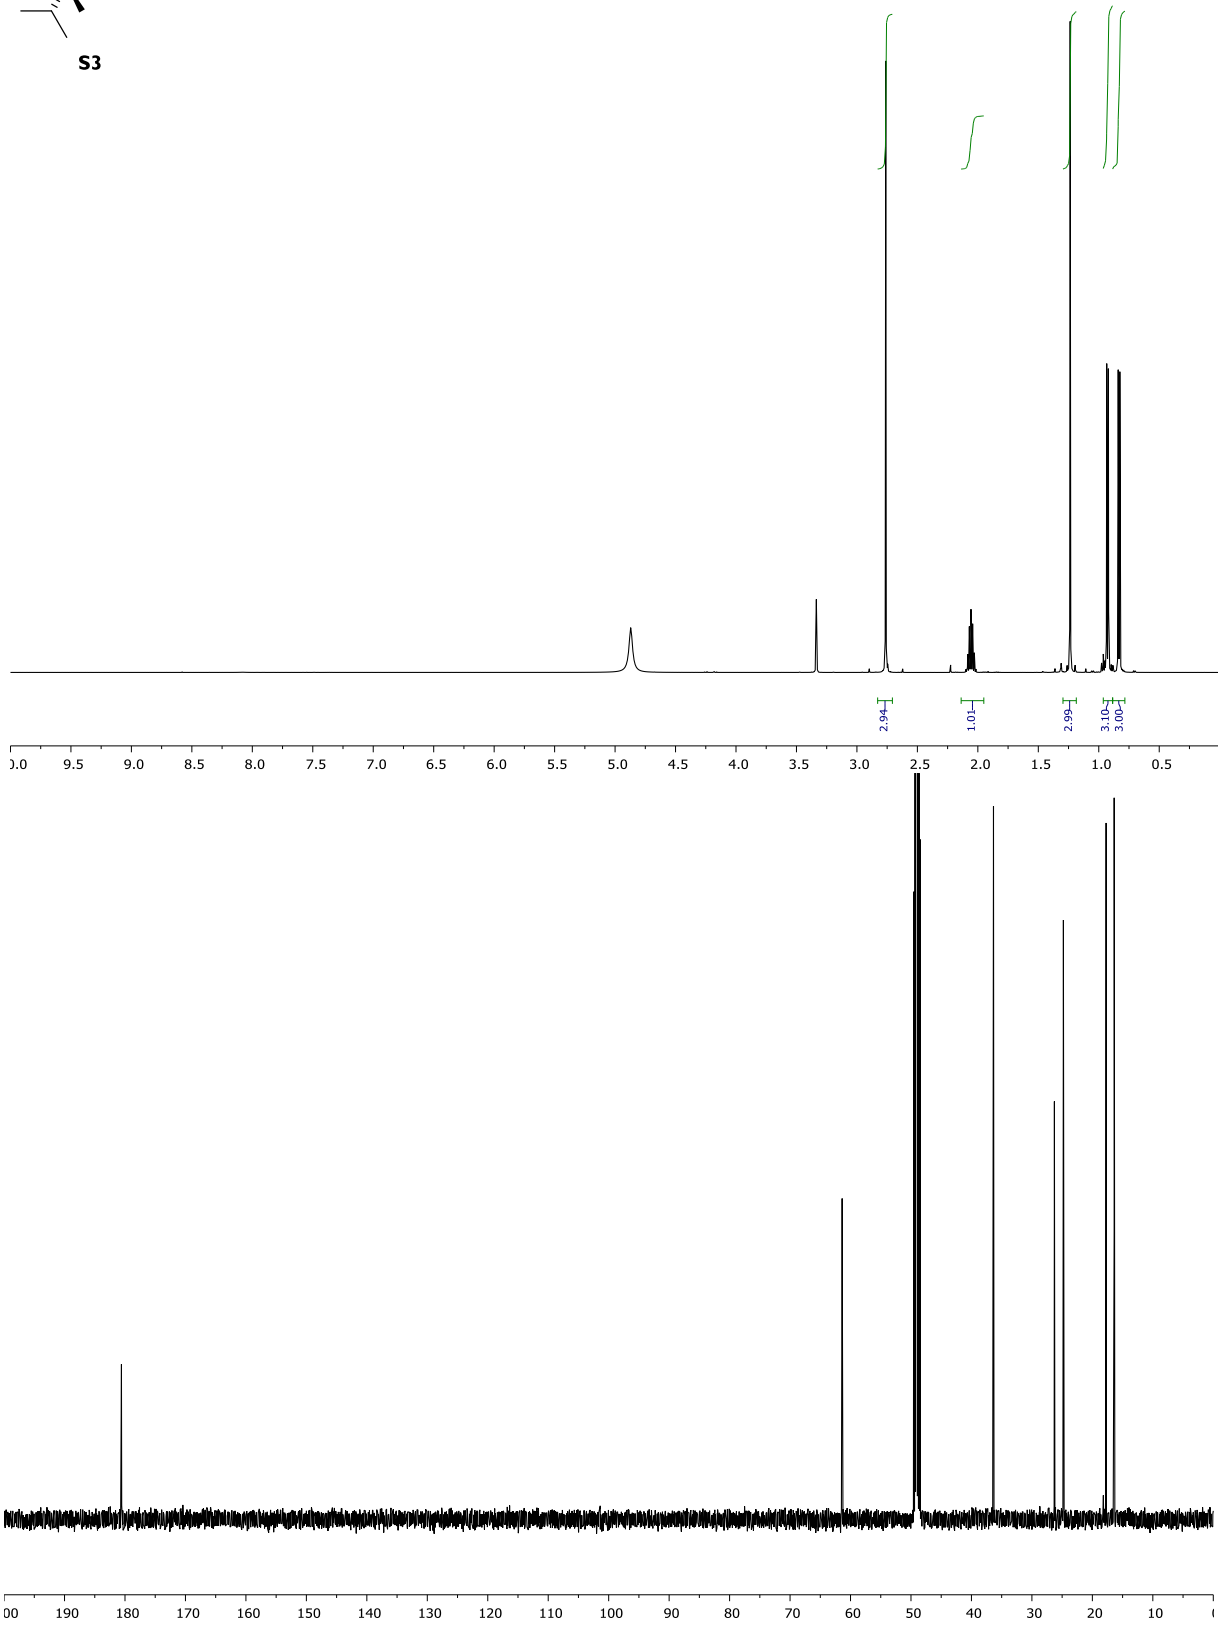

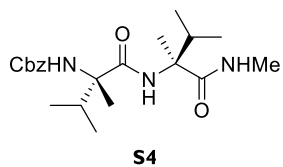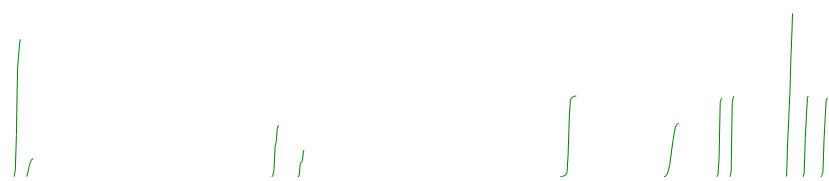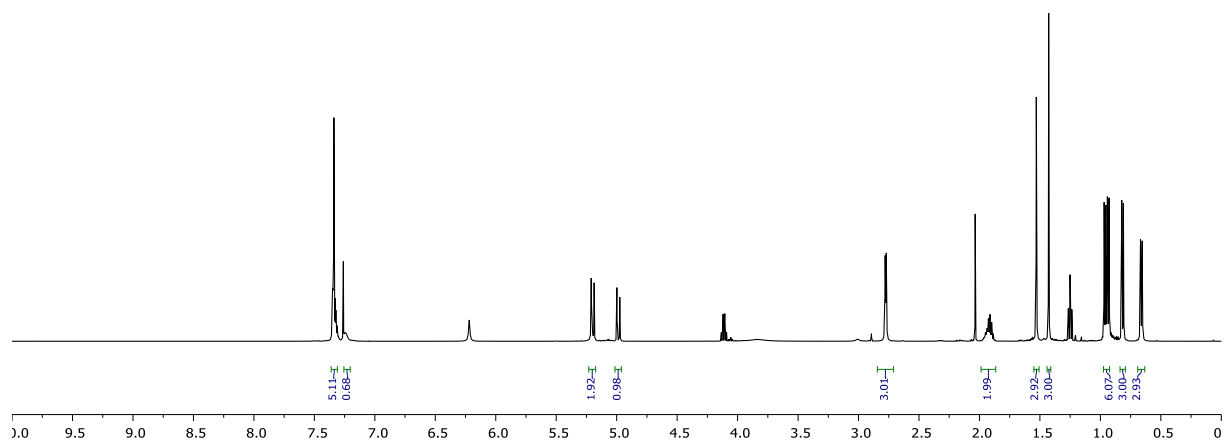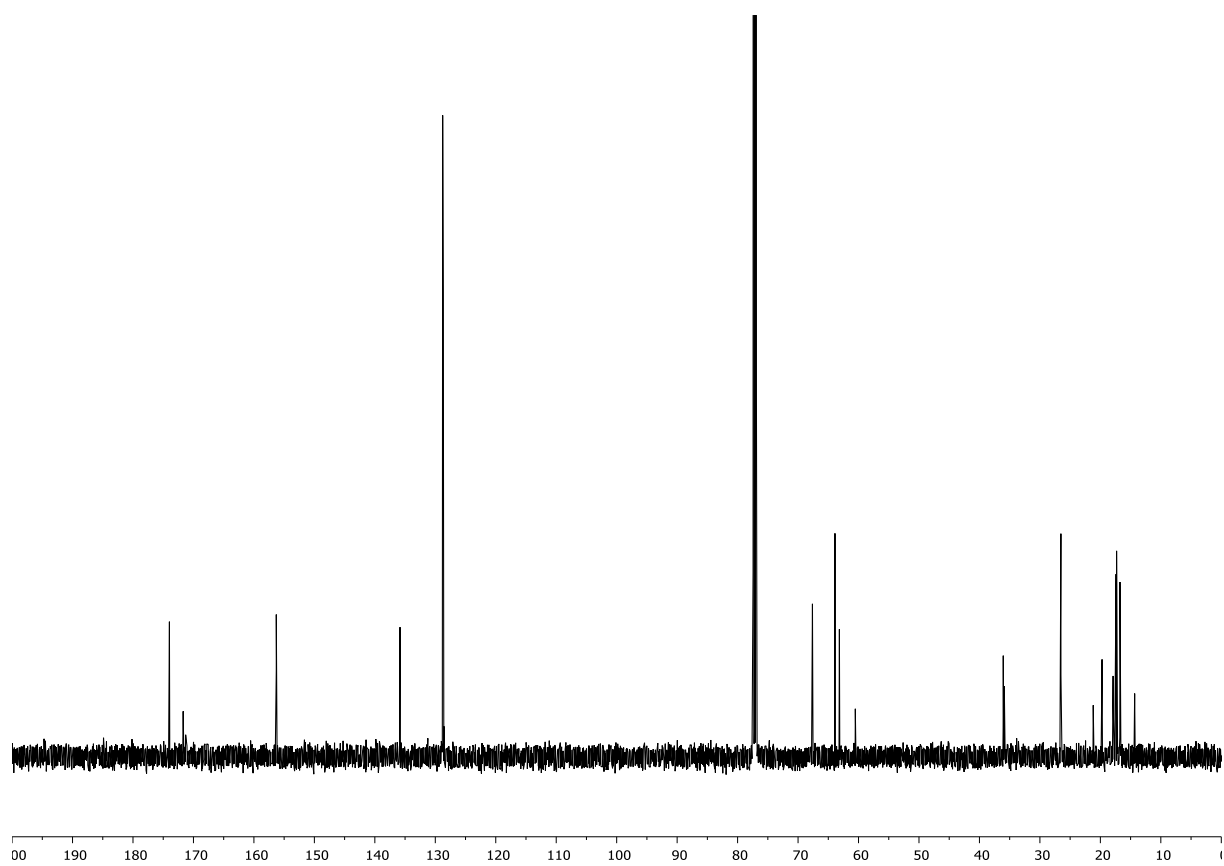

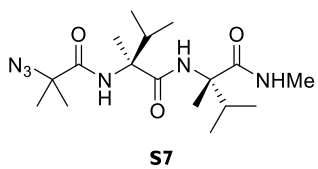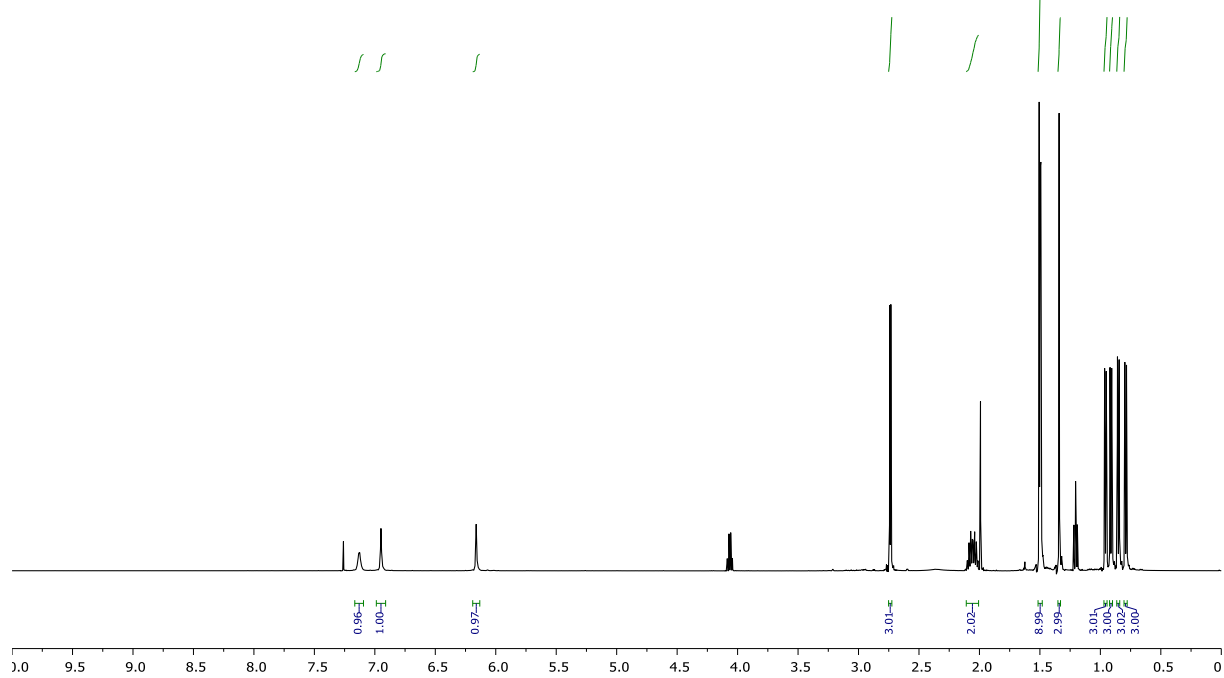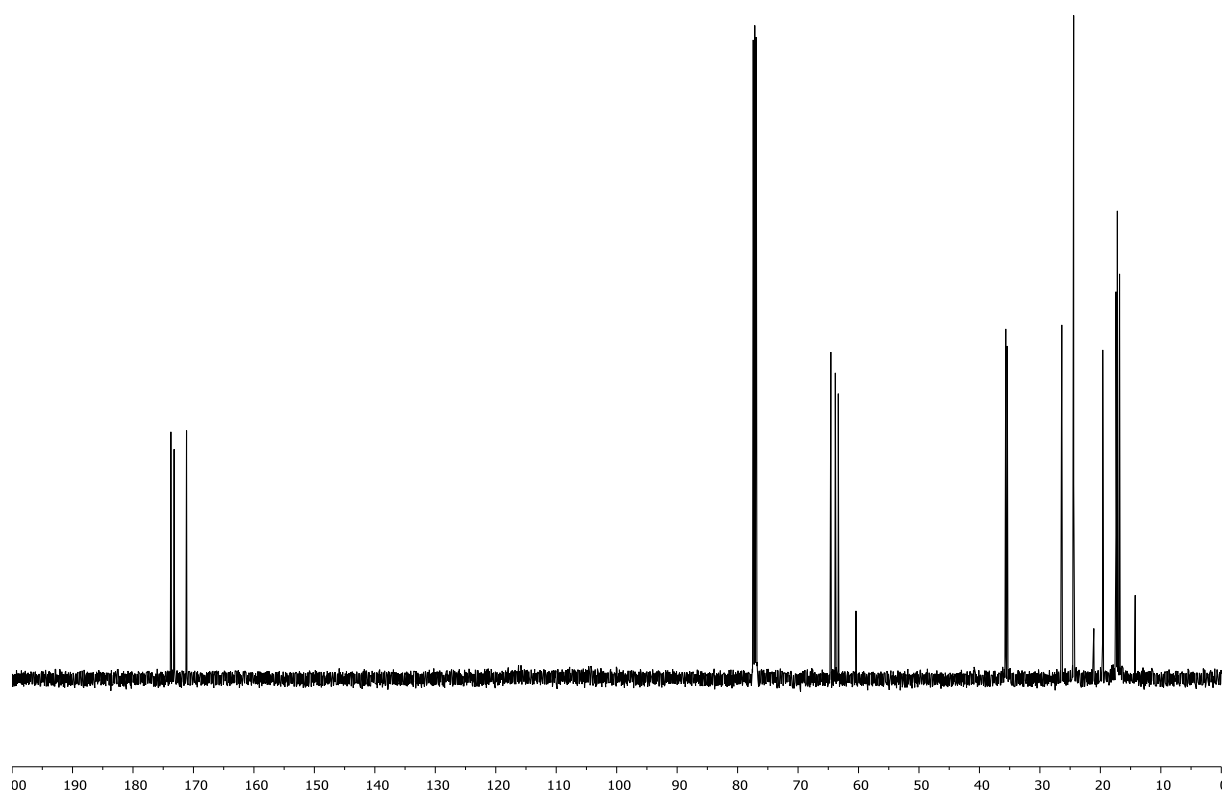





<sup>15</sup>N HSQC

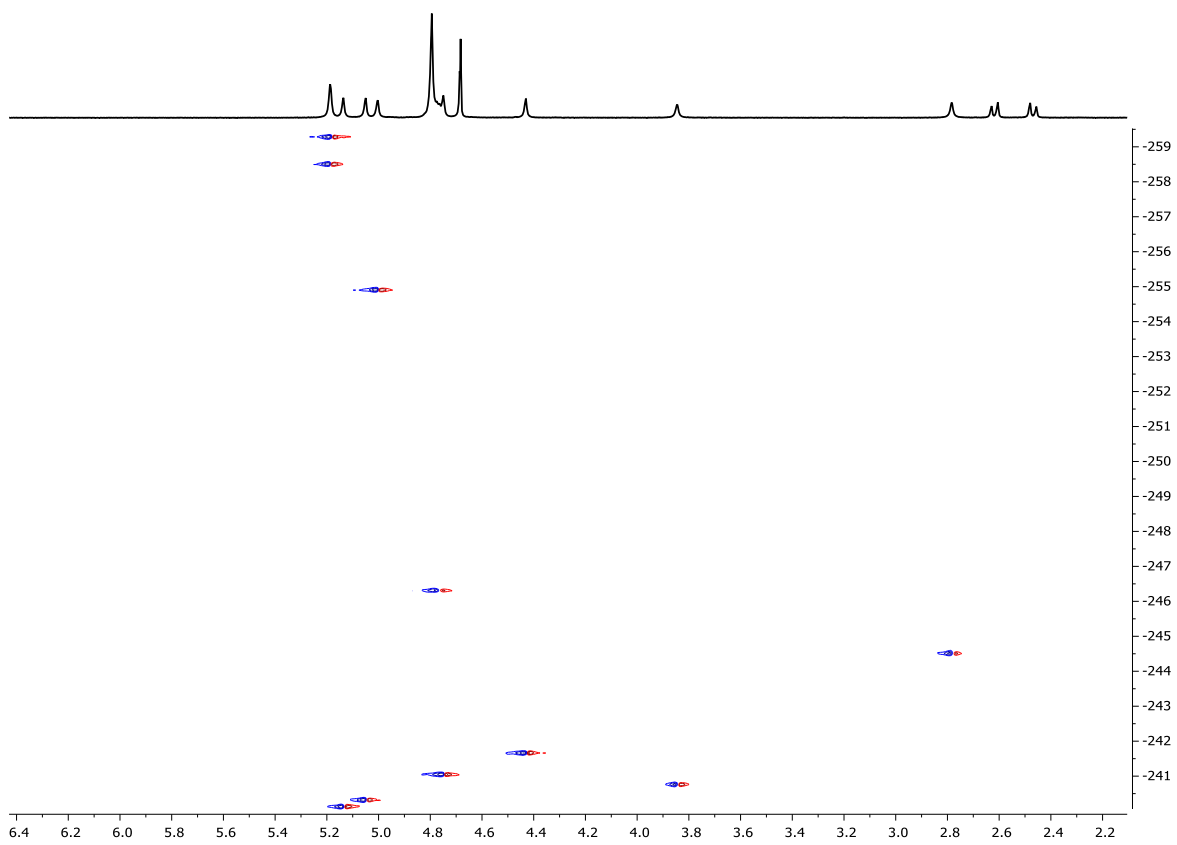

HSQC

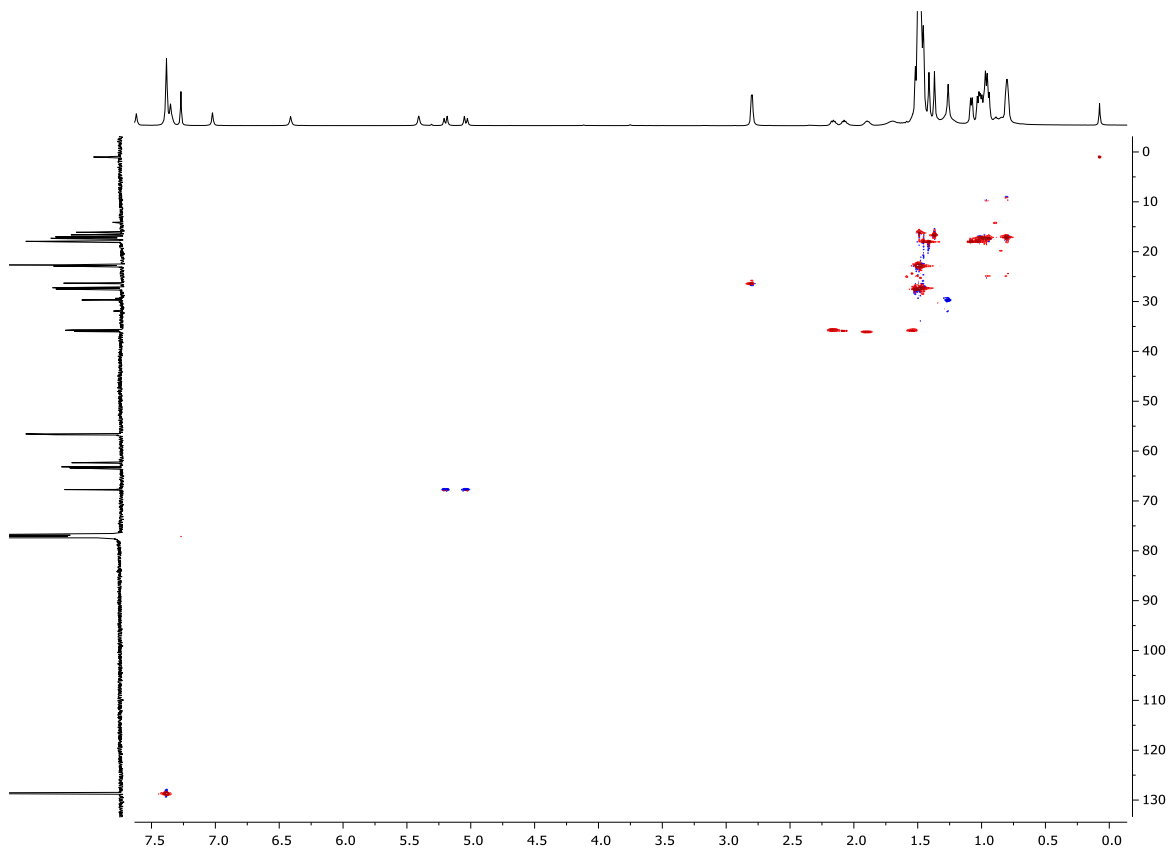

HMBC

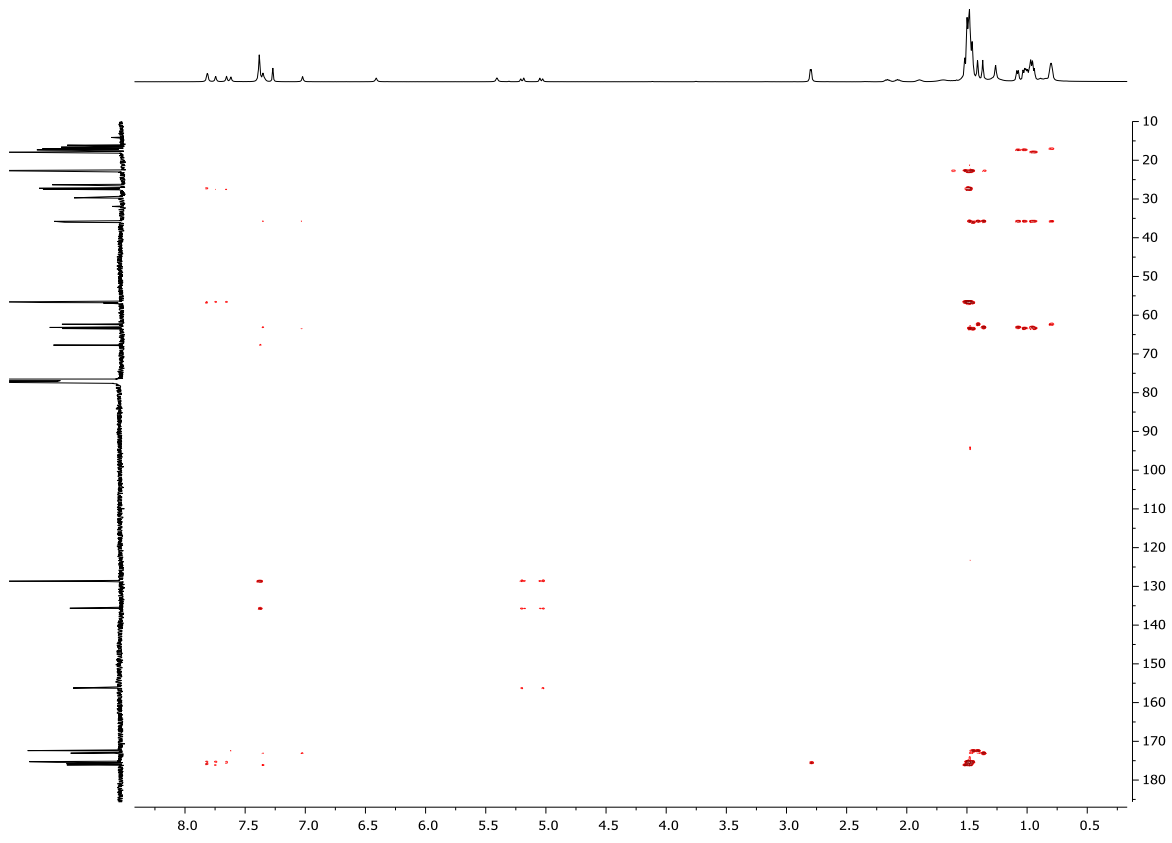



$^{15}\text{N}$  HSQC

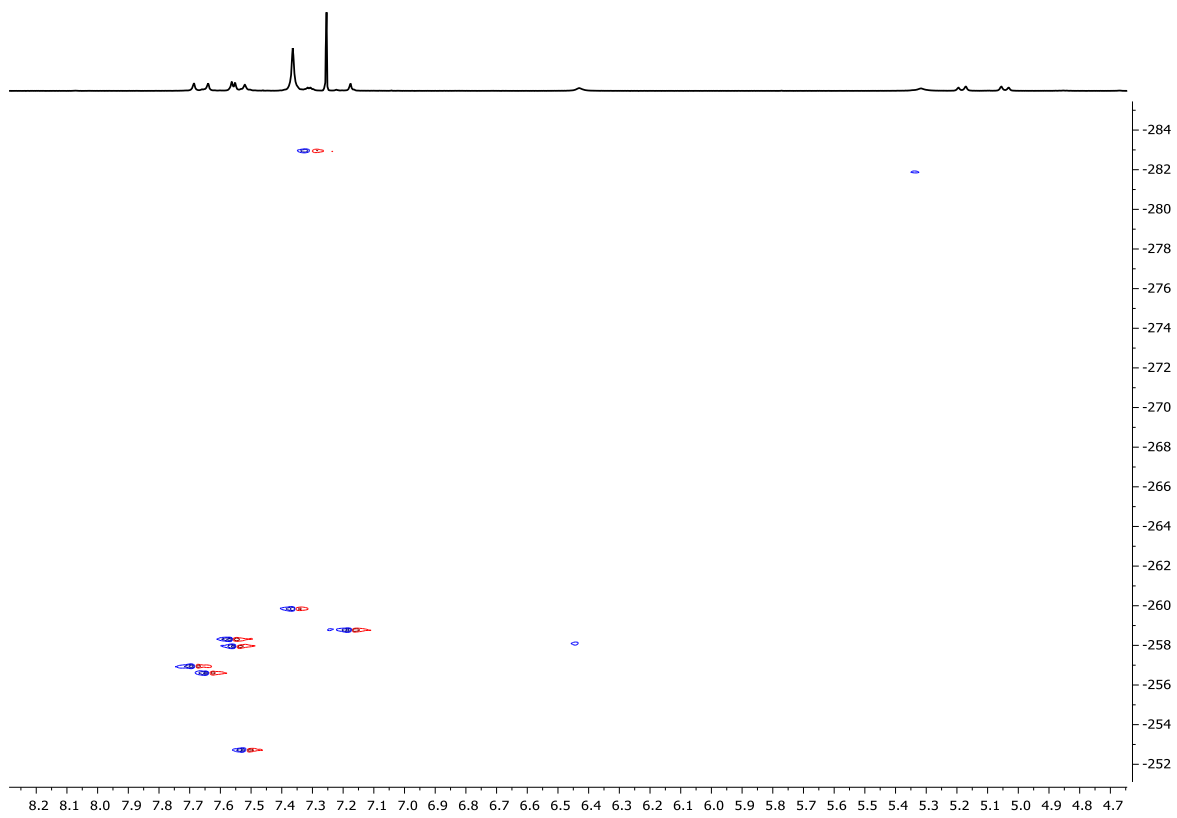

HSQC

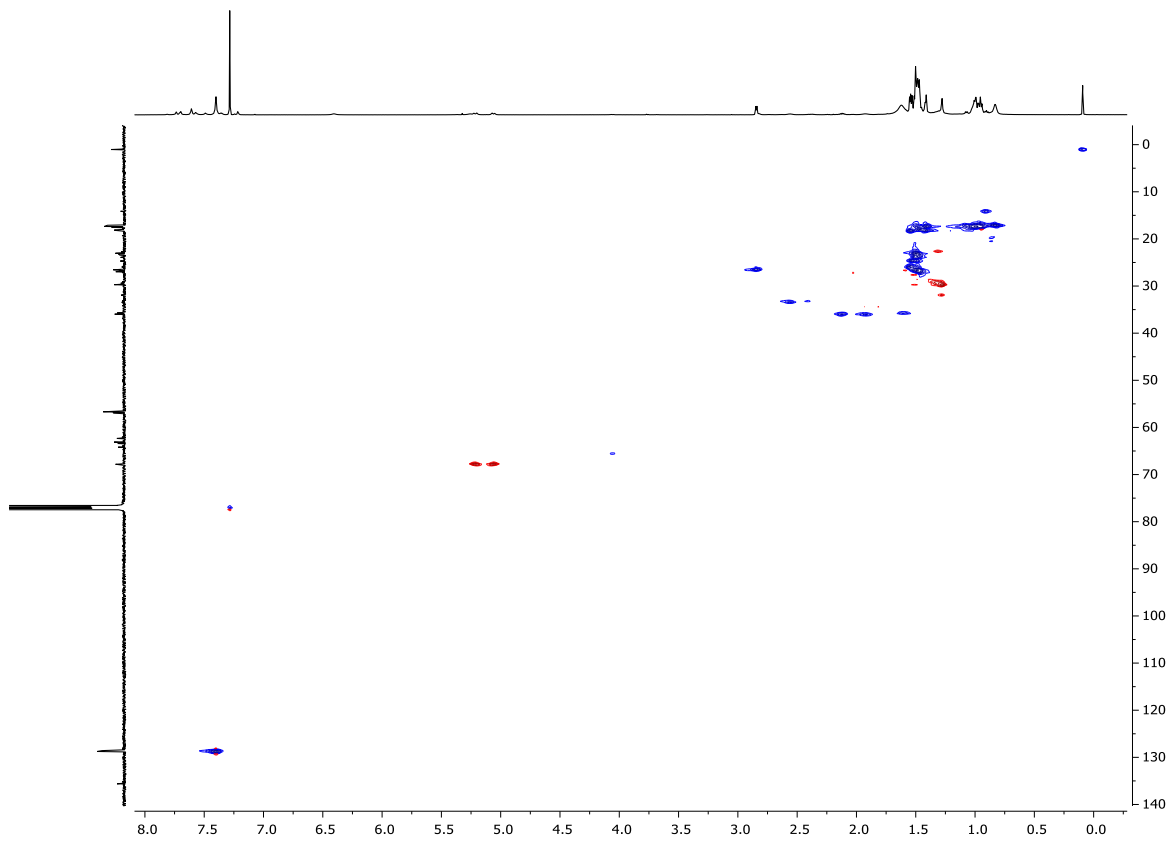

HMBC

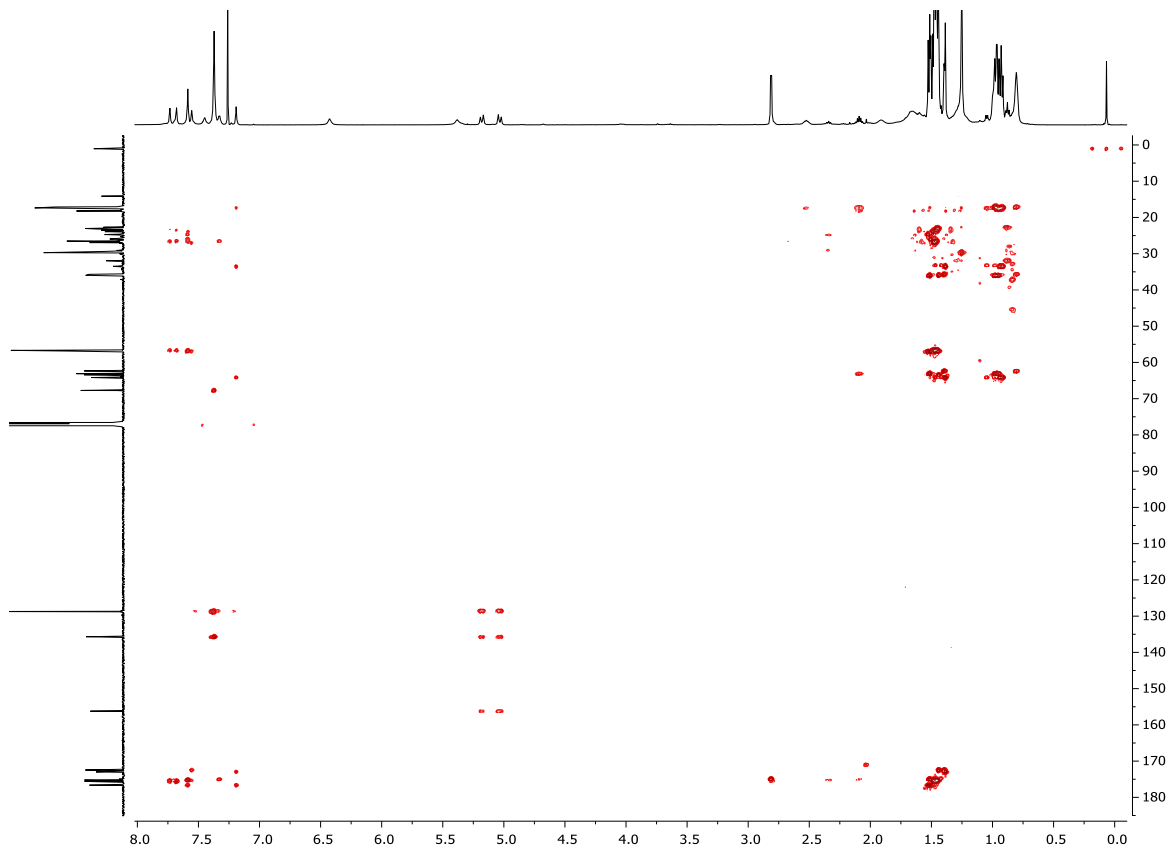

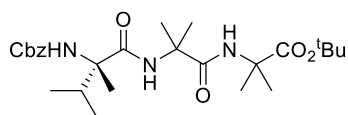

S11

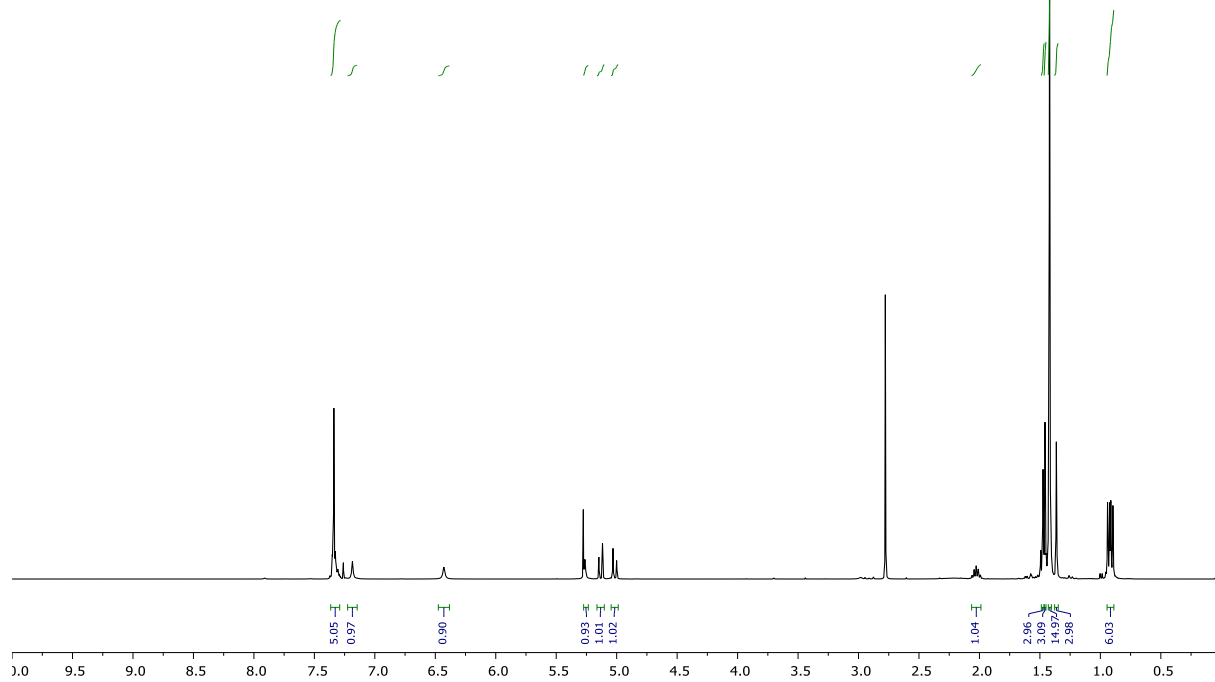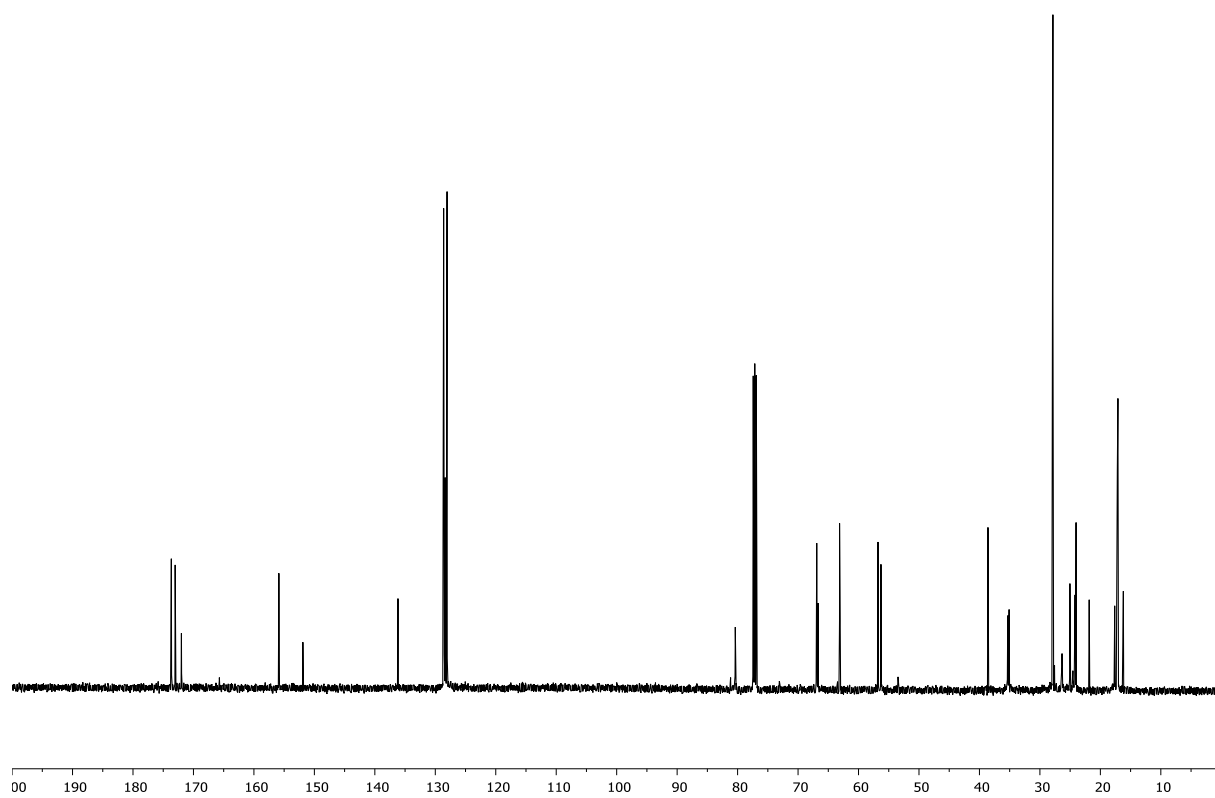

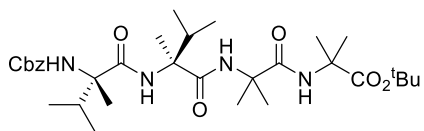

**S13**

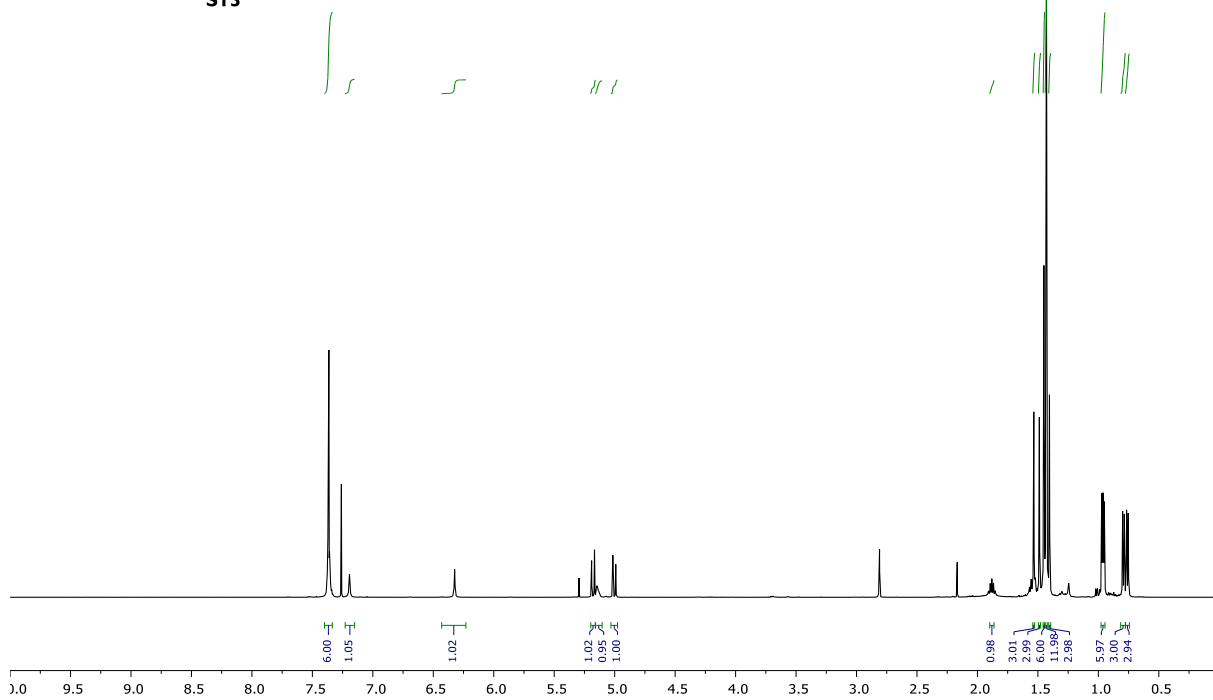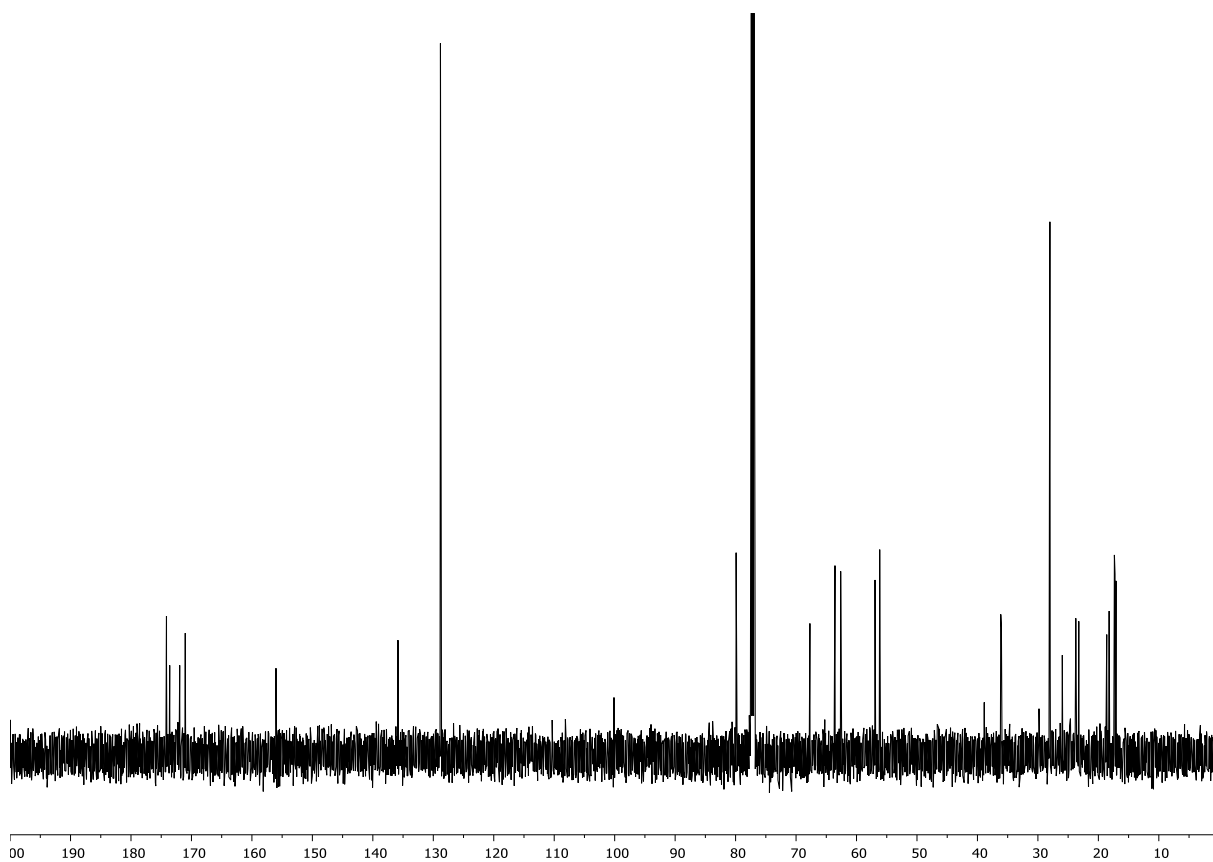





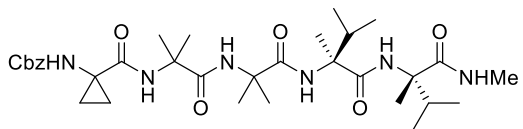

S17

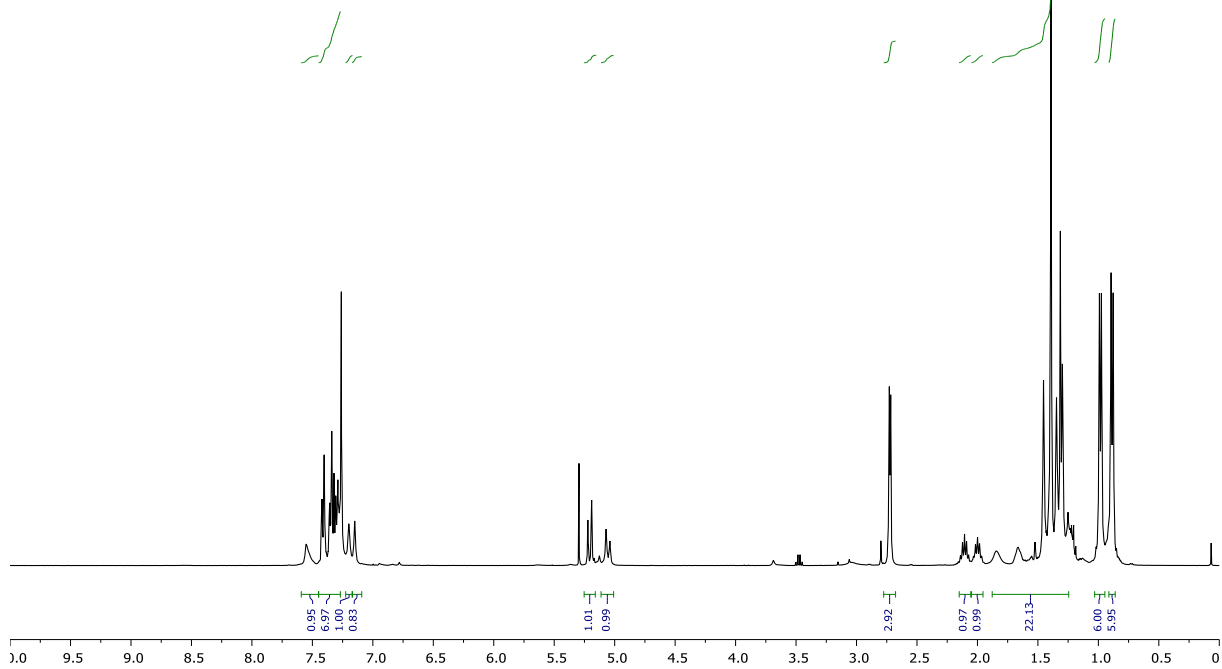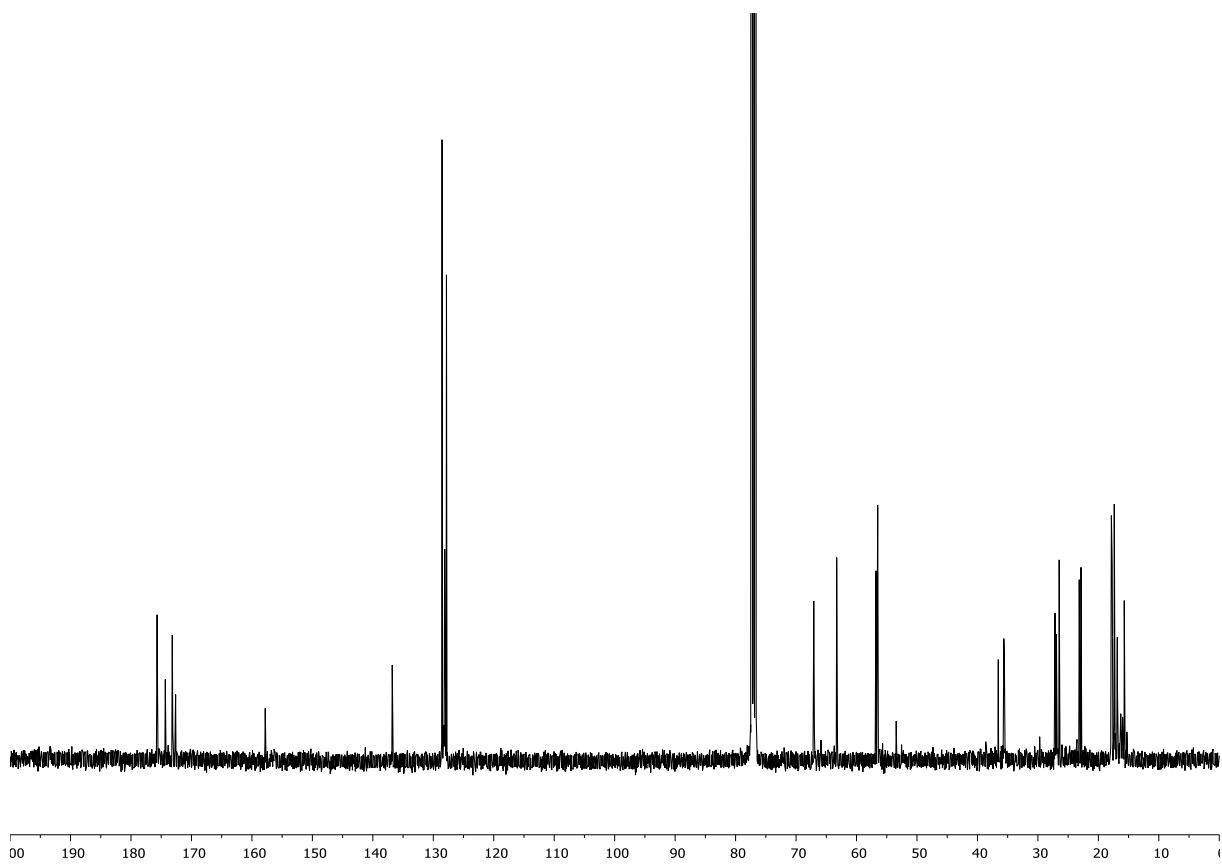



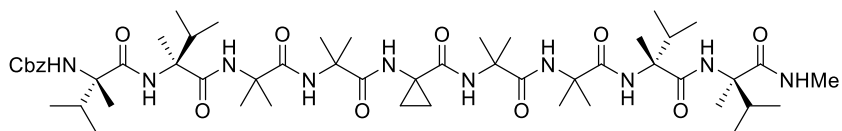

**2b**

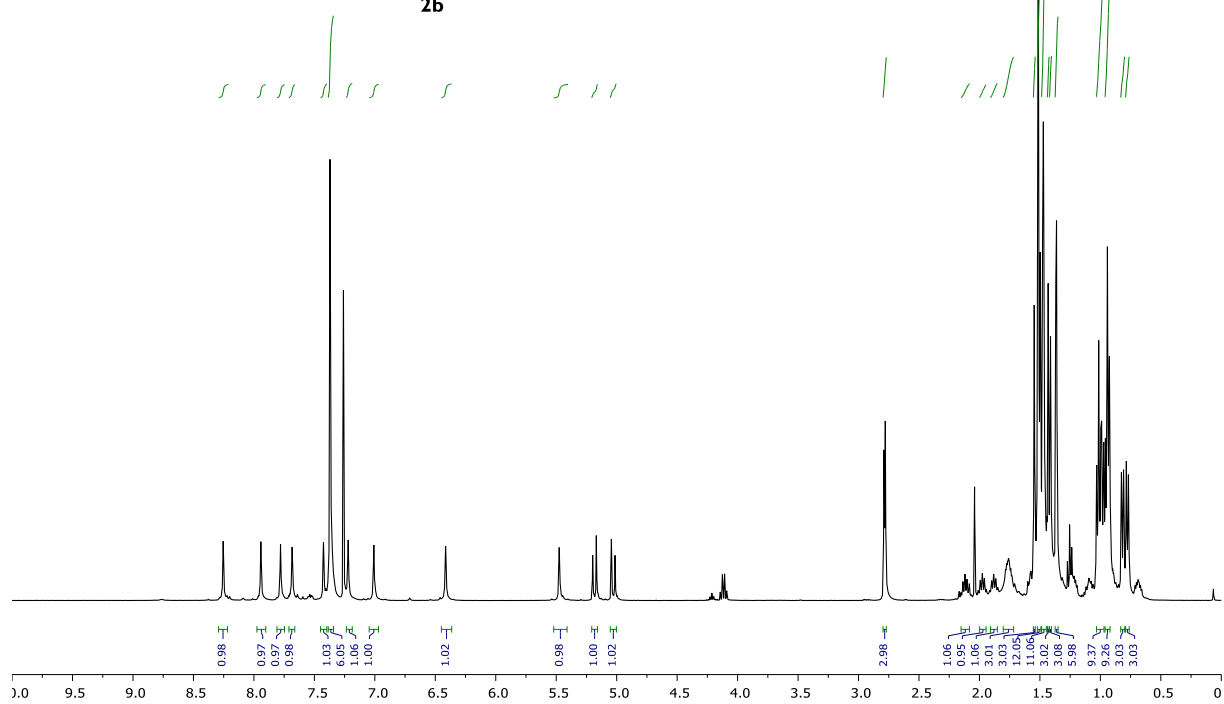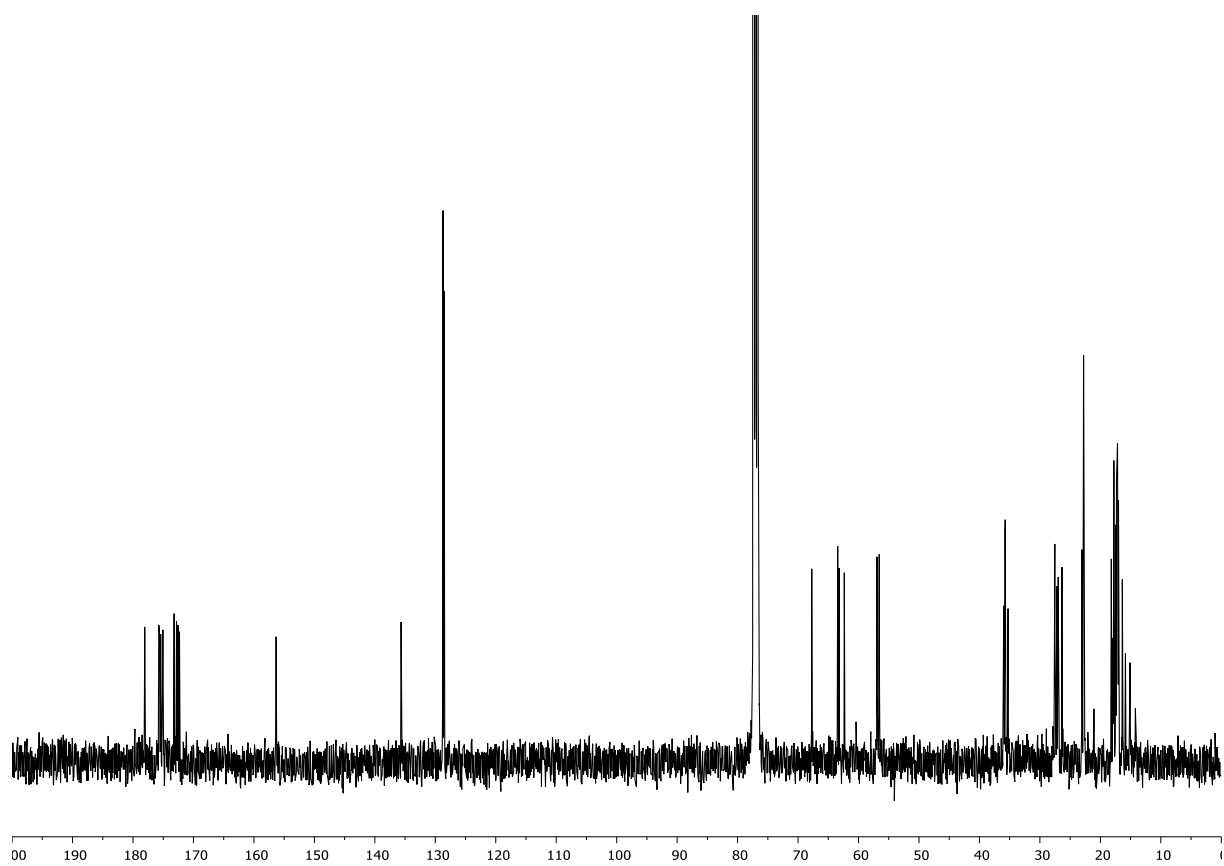

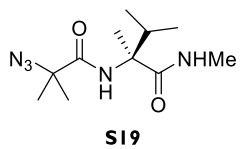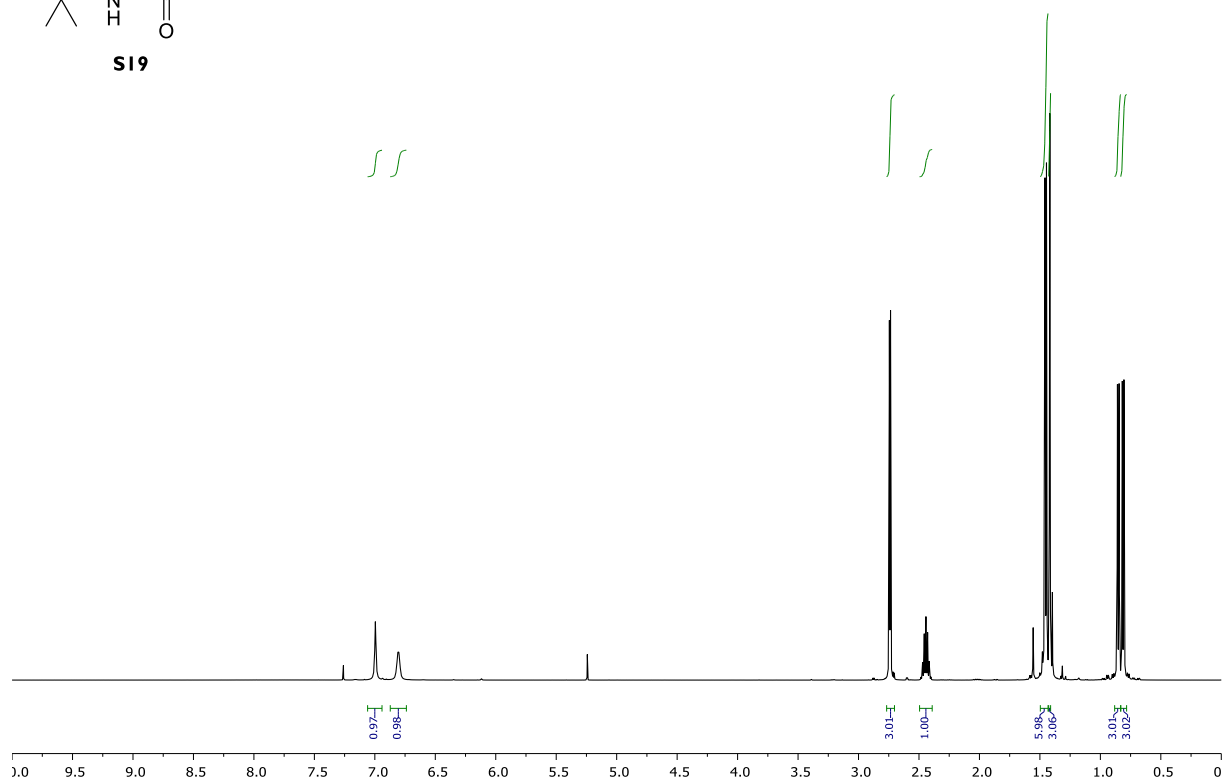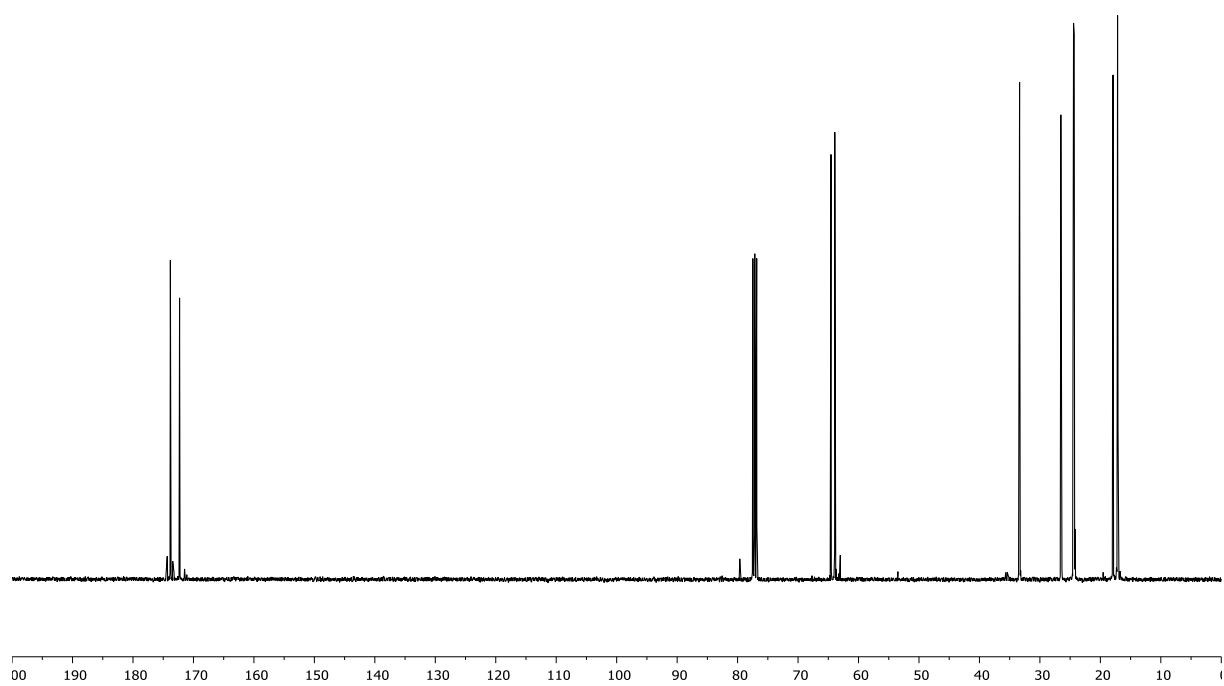



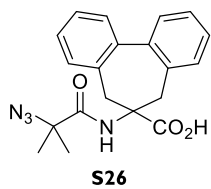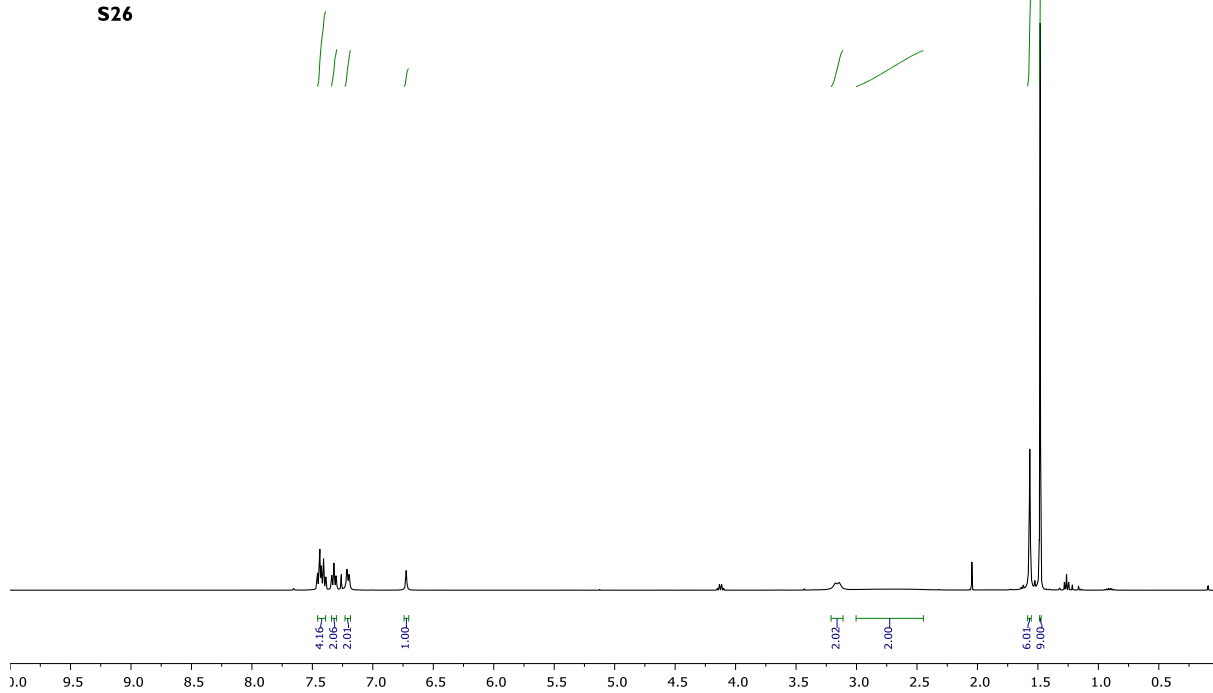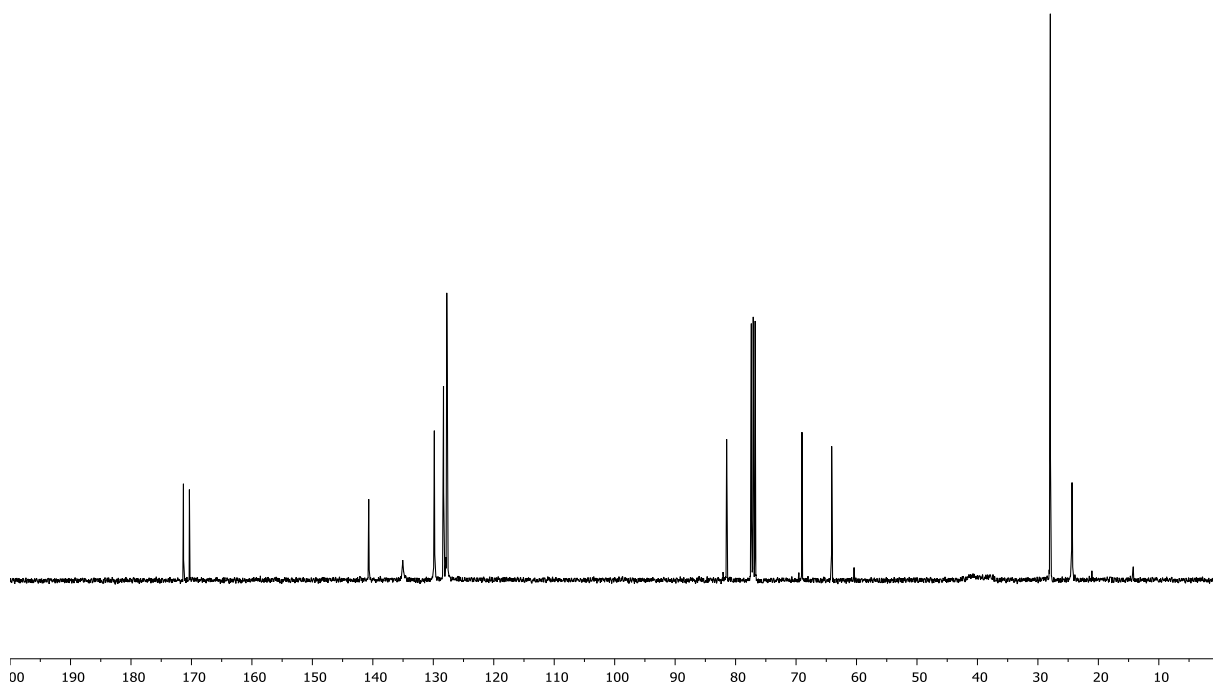

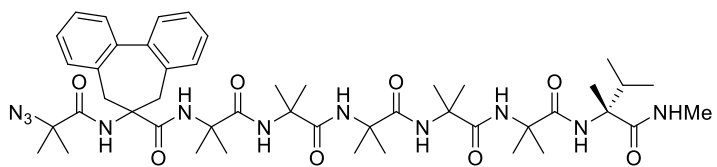

**S27**

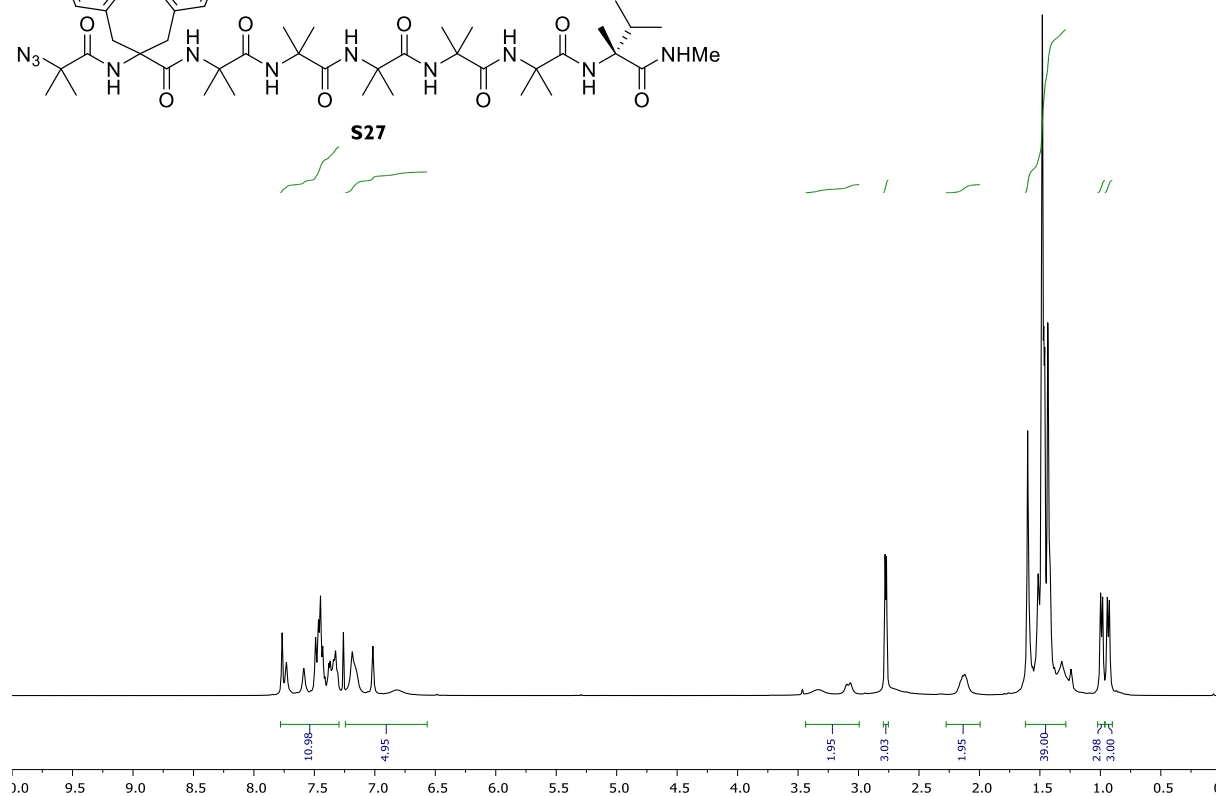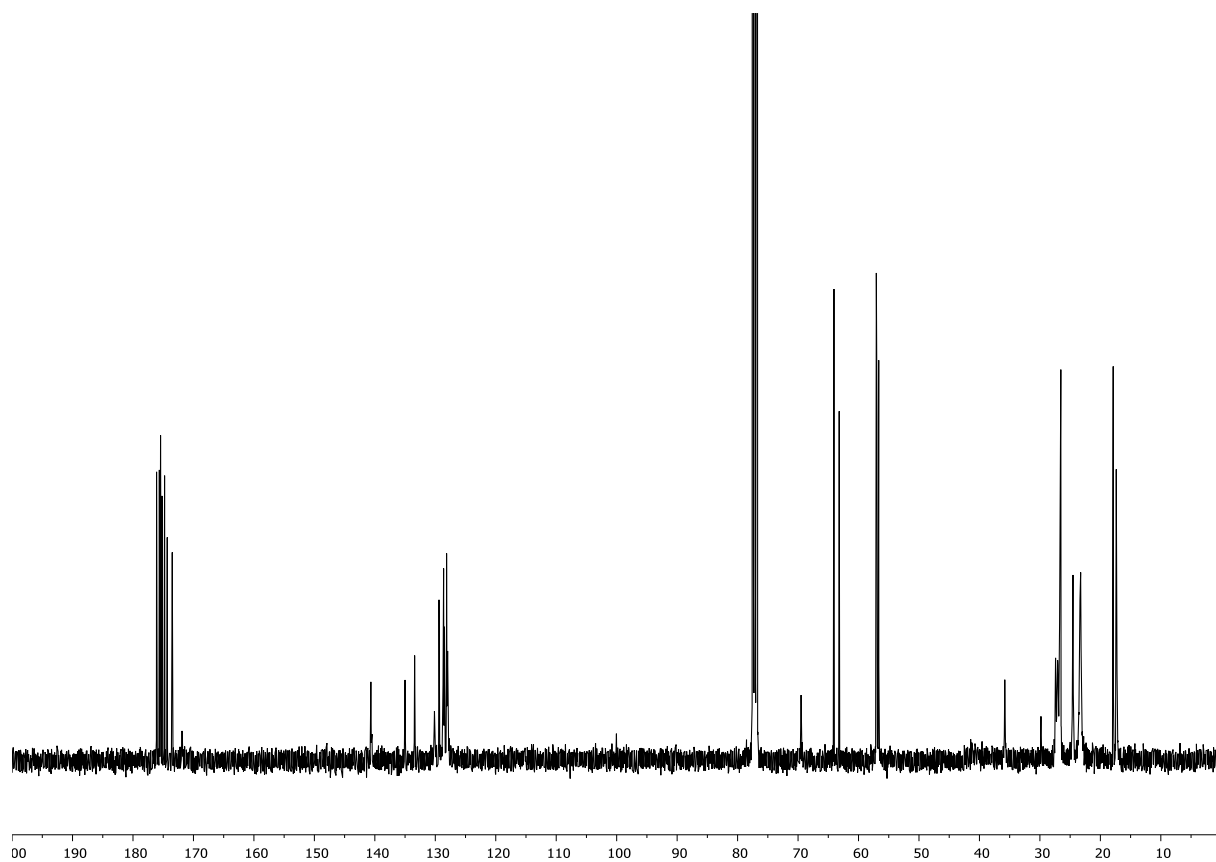



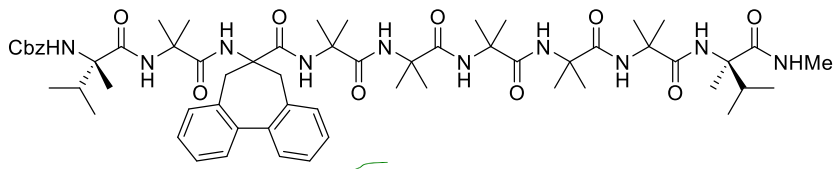

**4a**

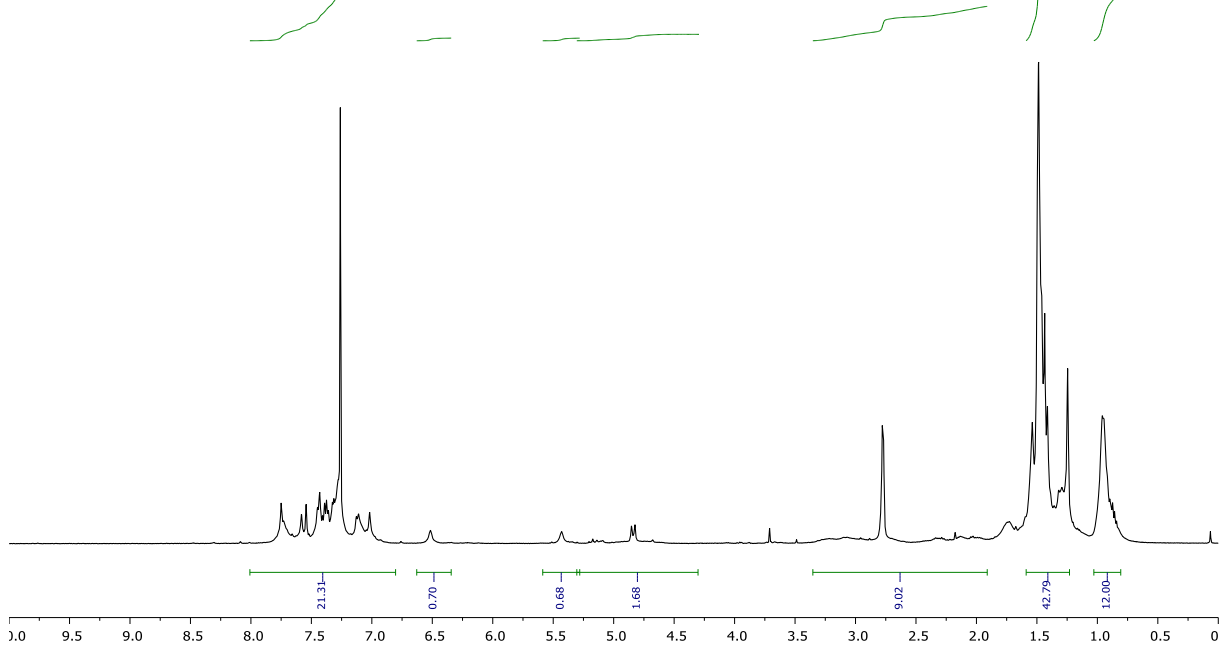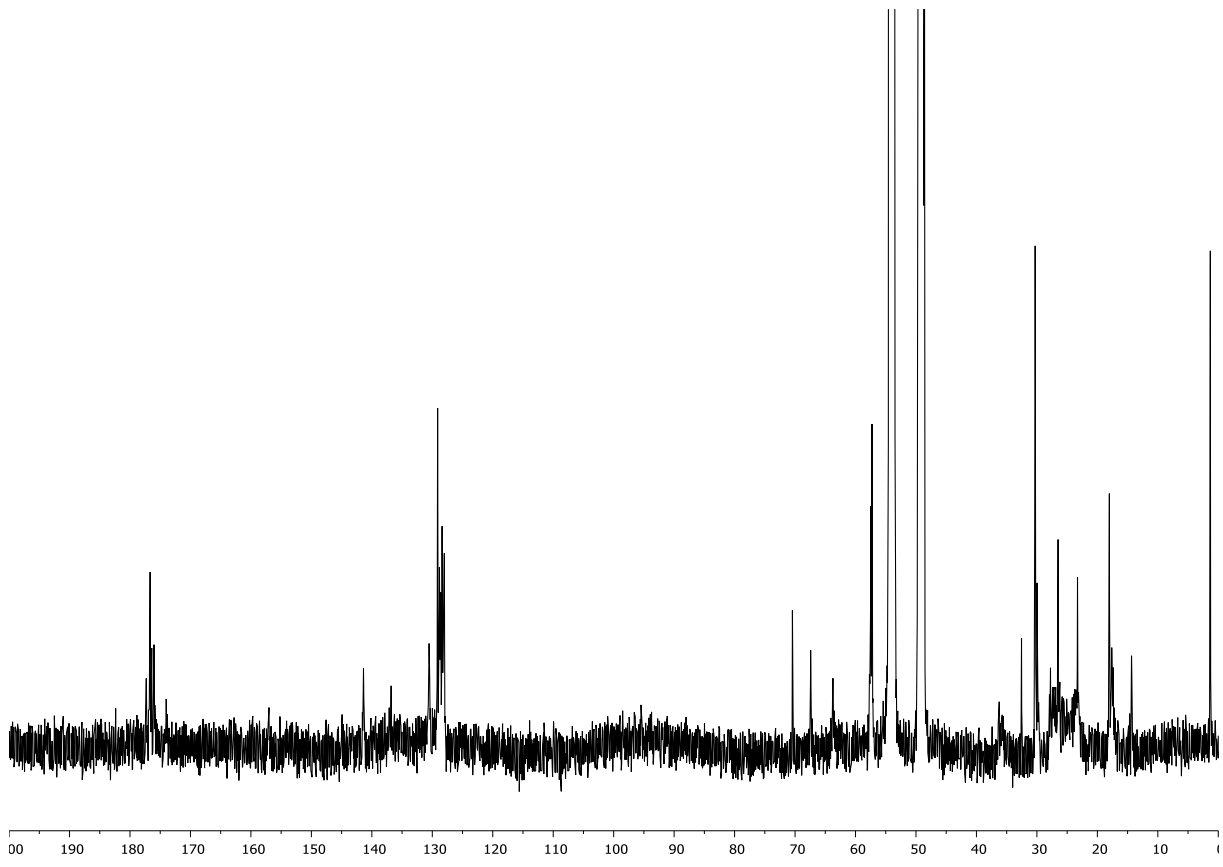

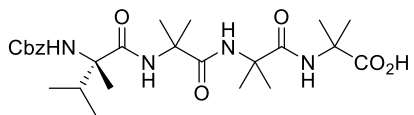

**S30**

*(Handwritten green annotations above the spectrum)*

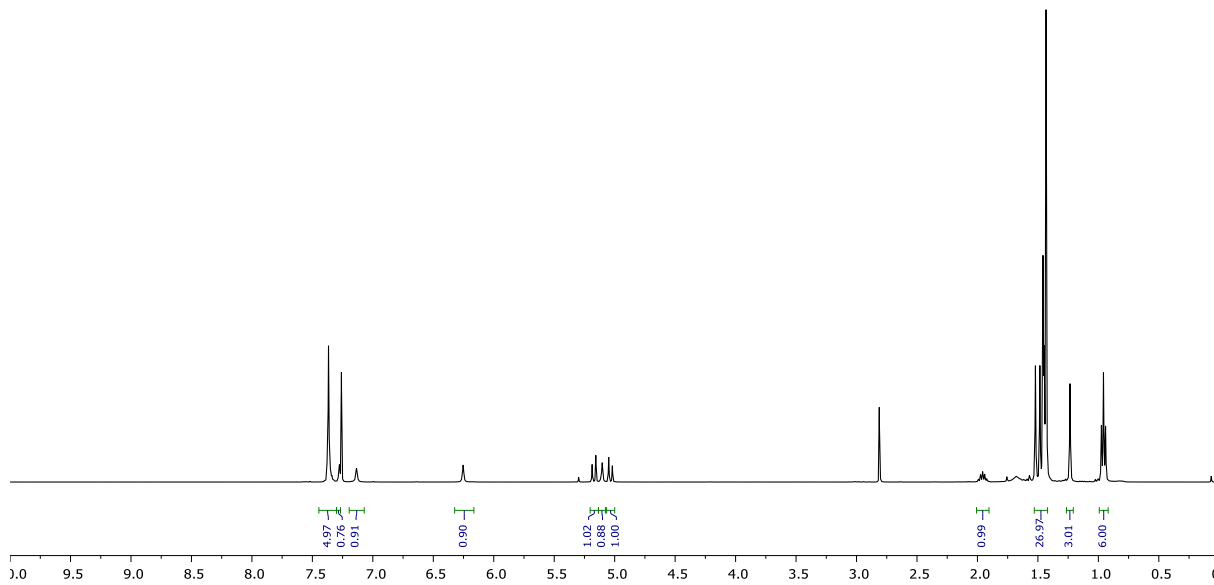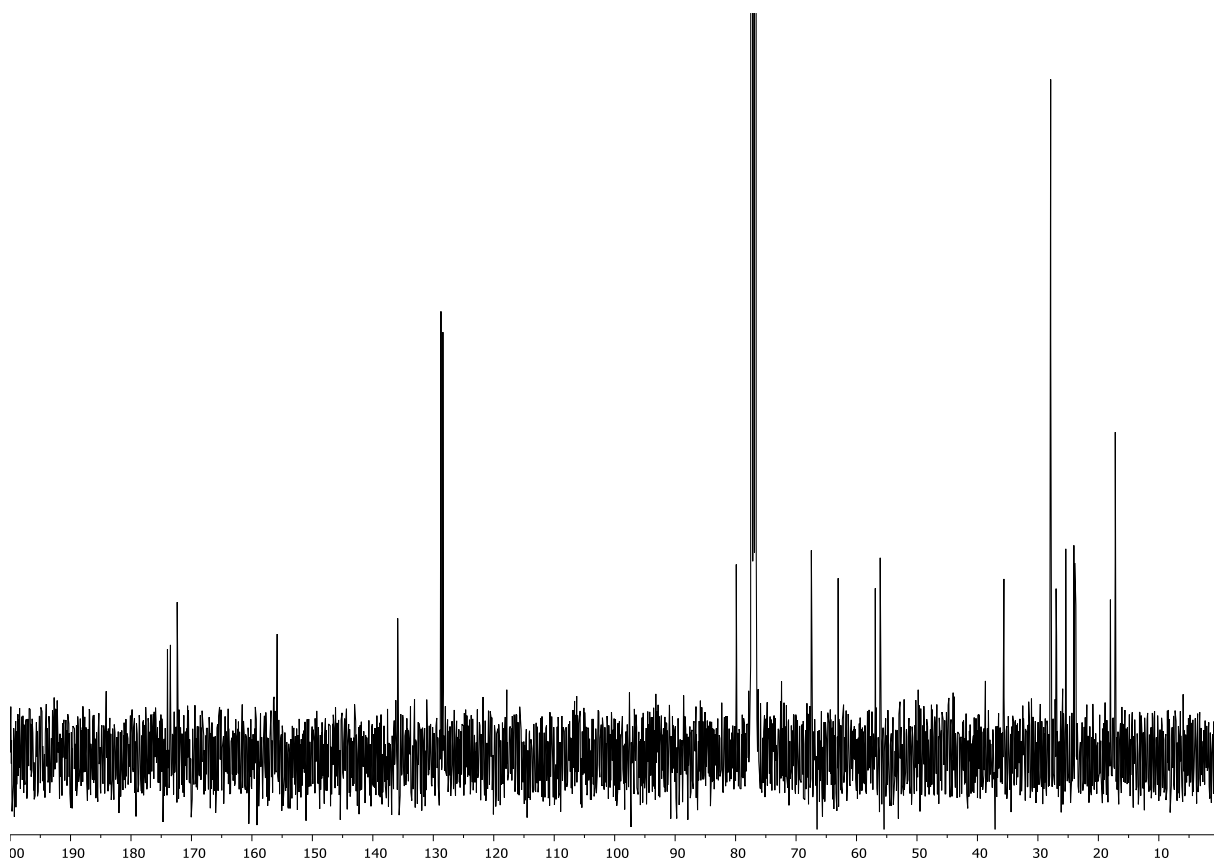

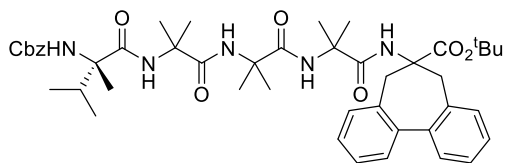

S31

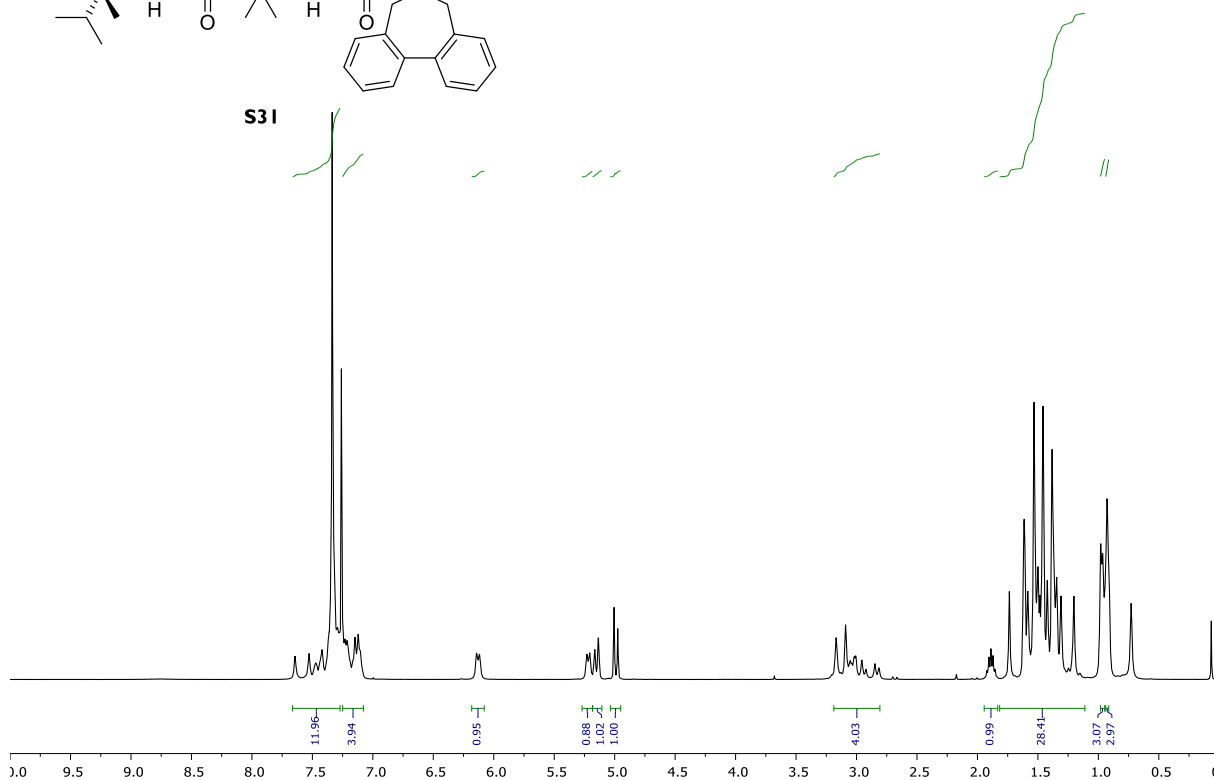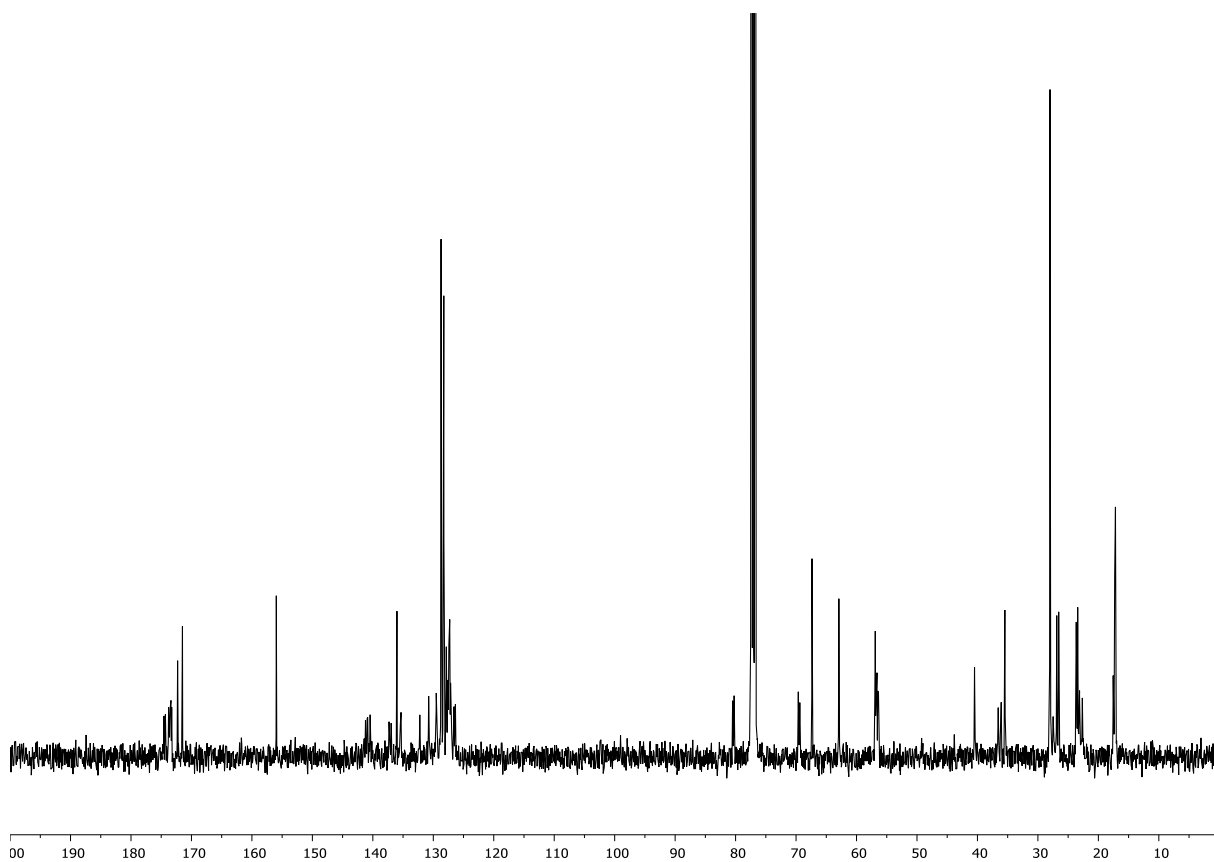

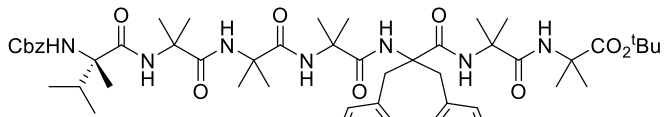

S33

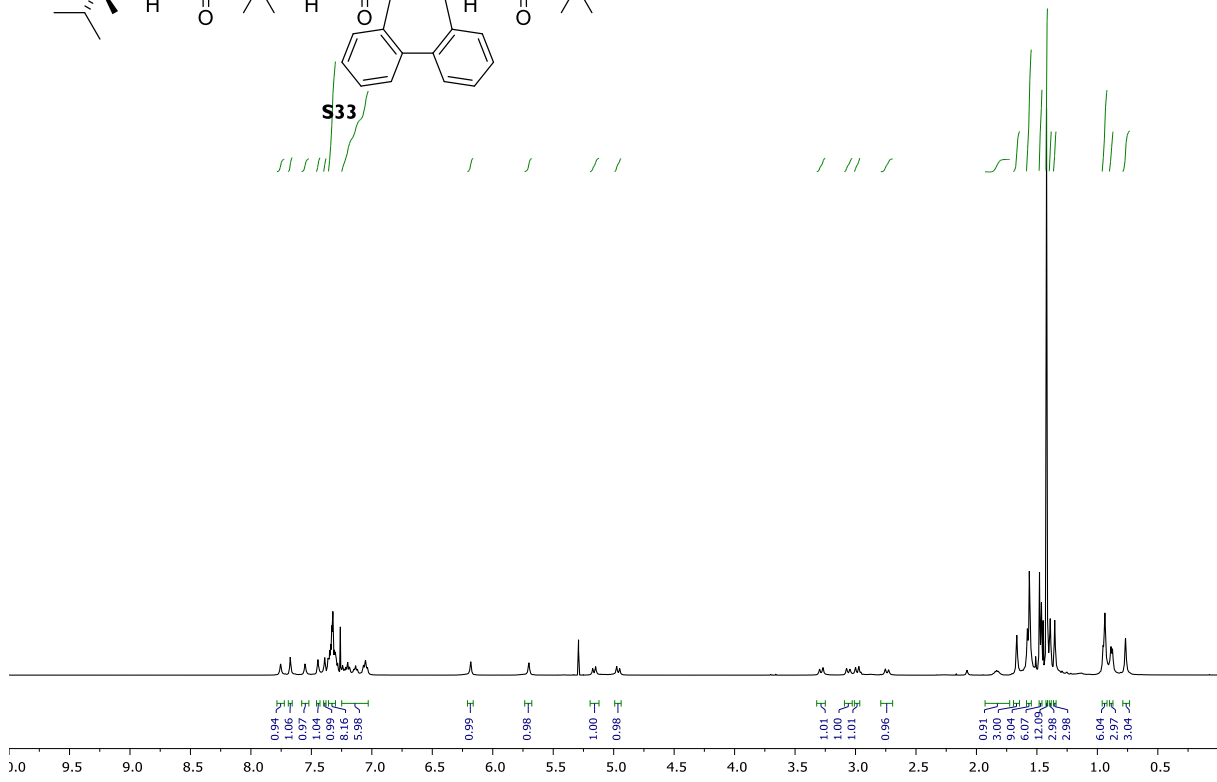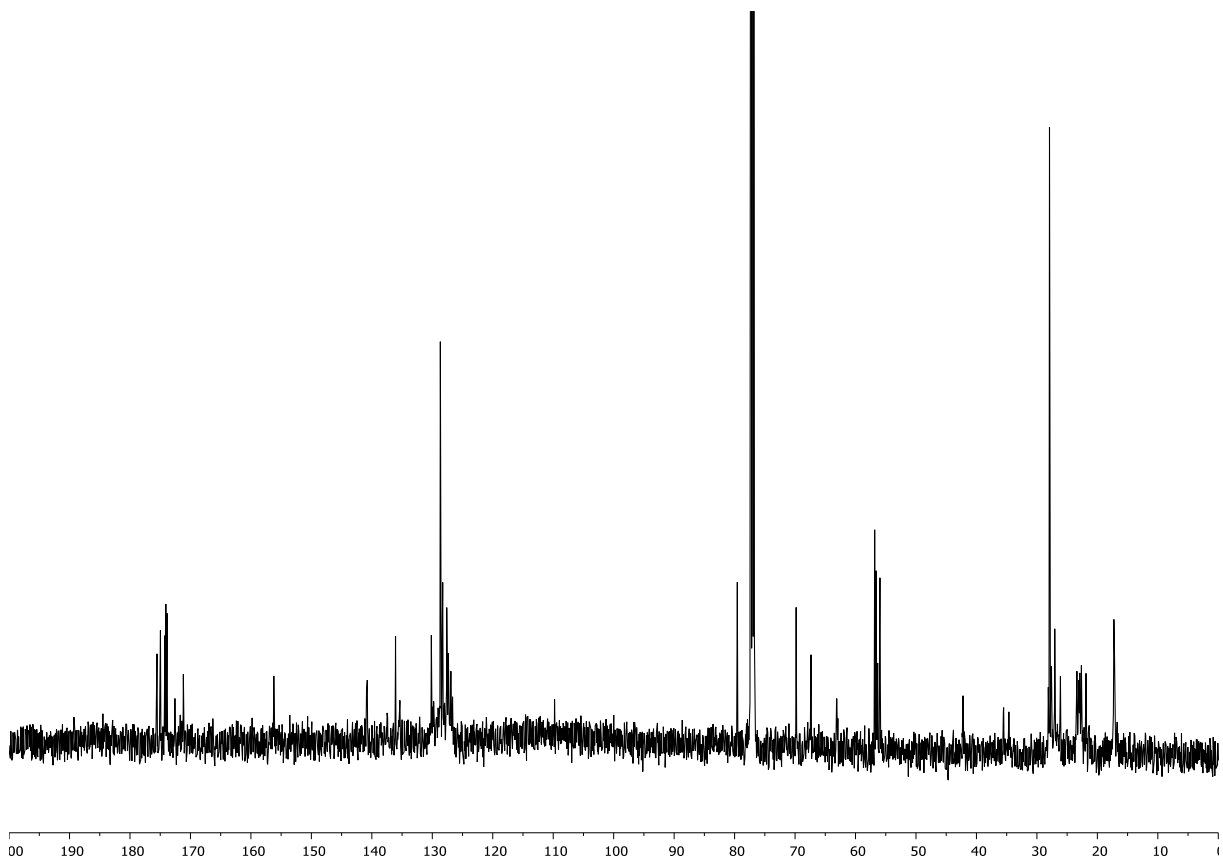

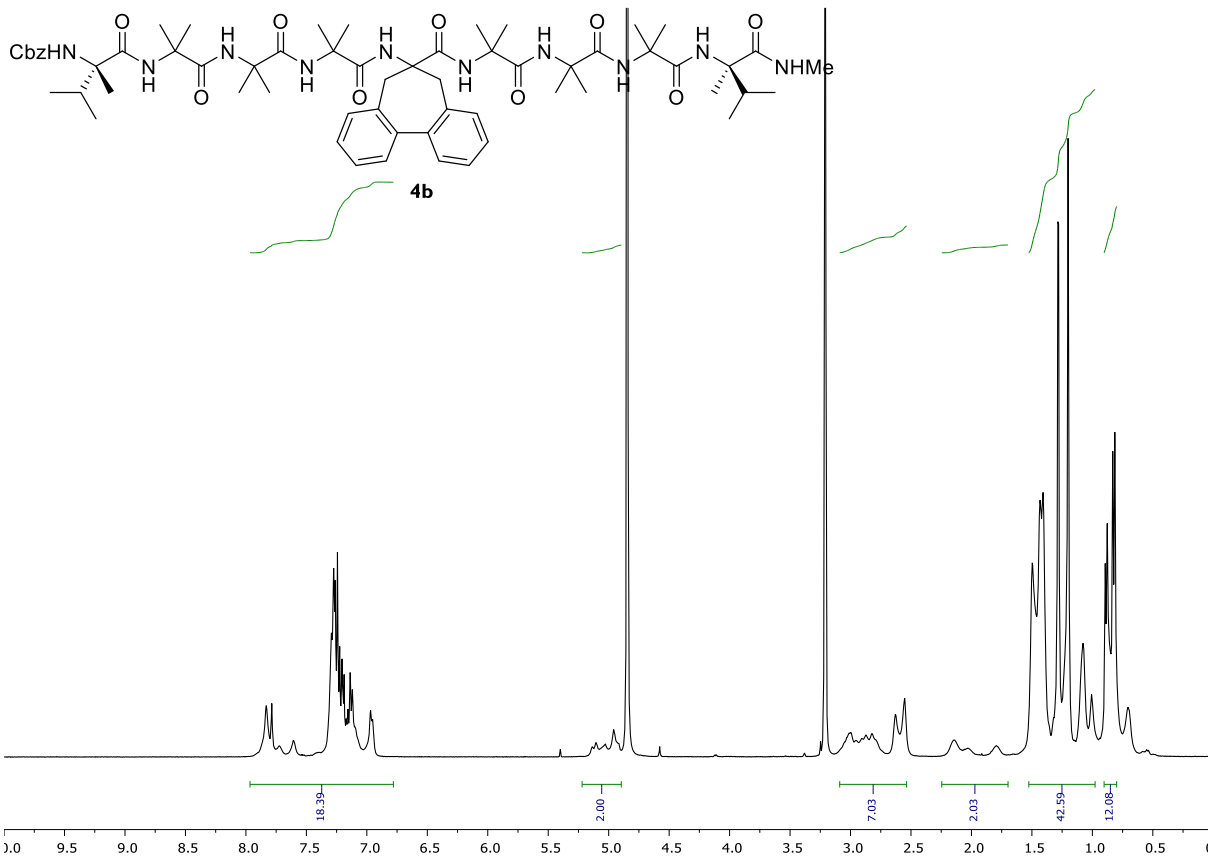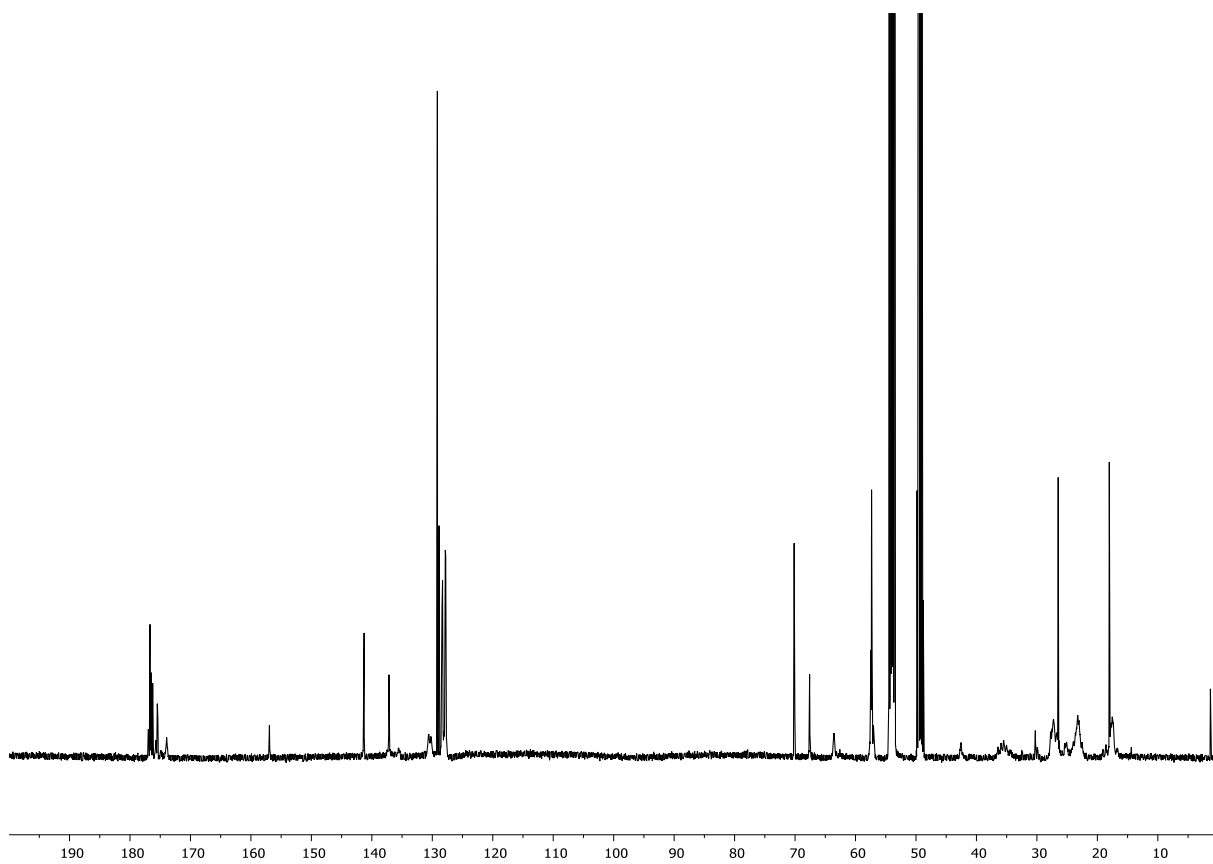

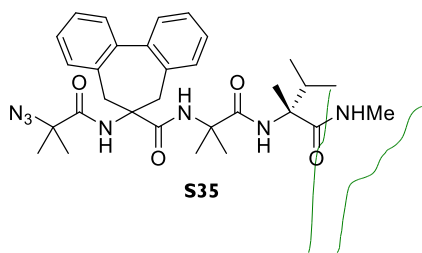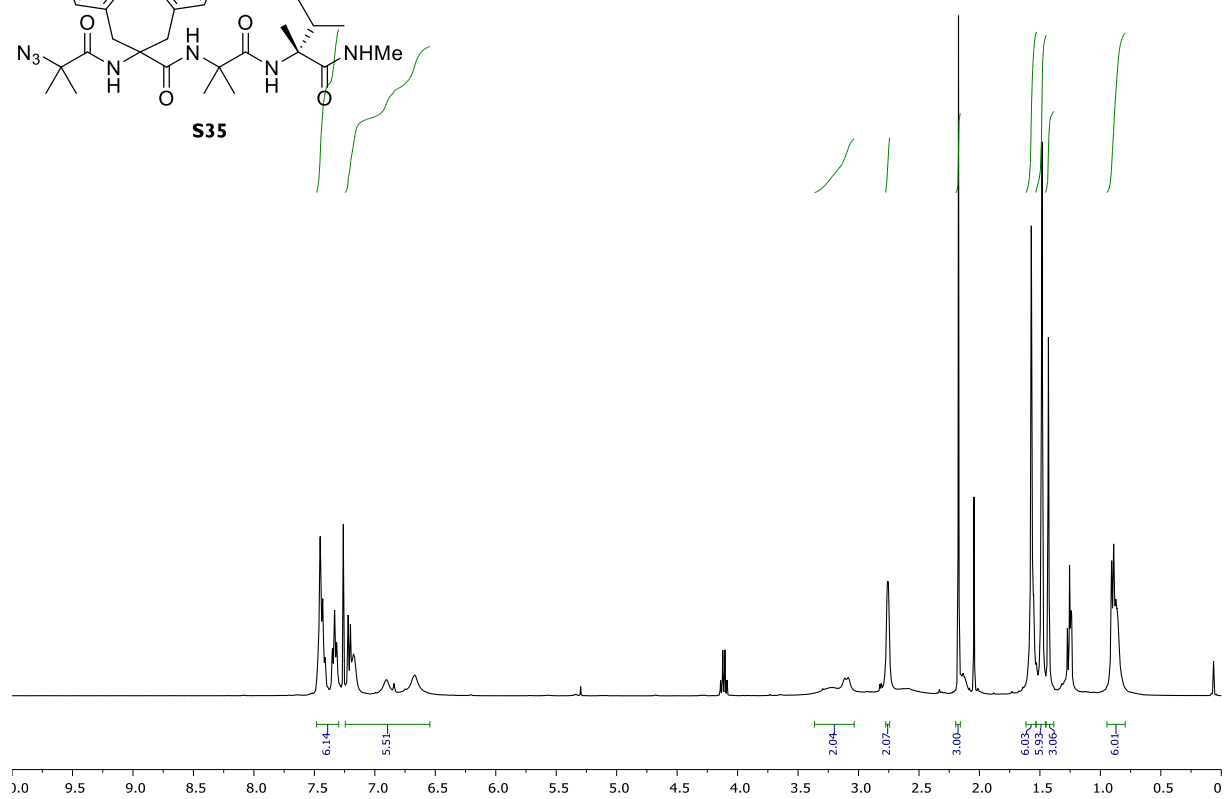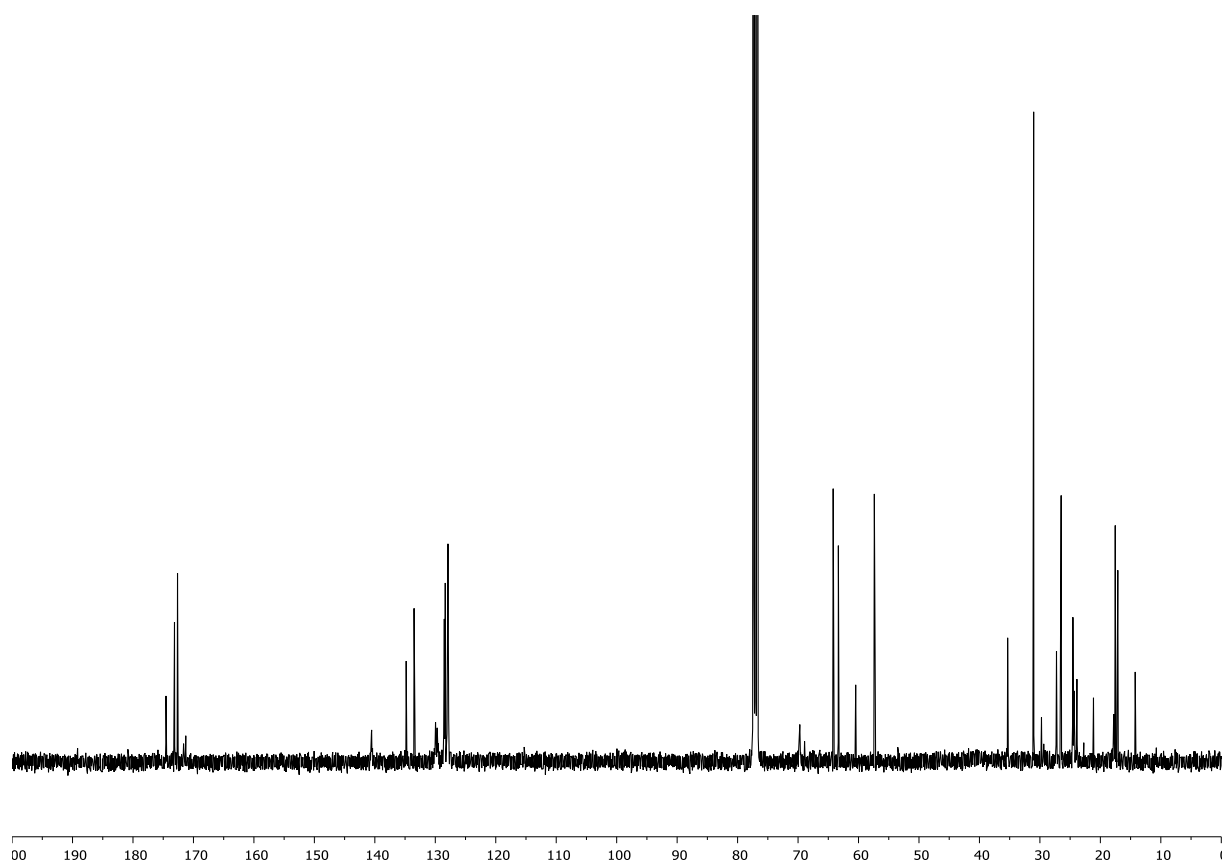

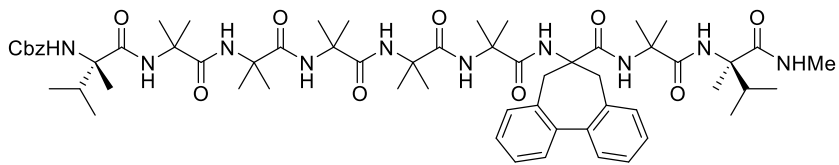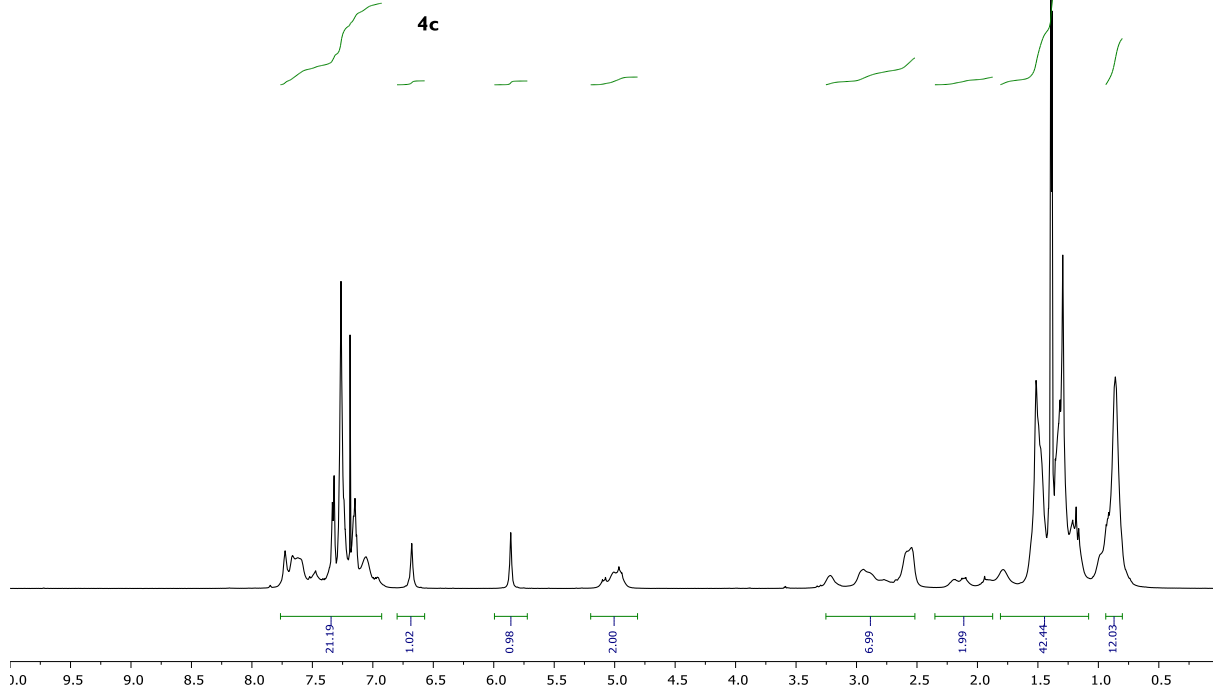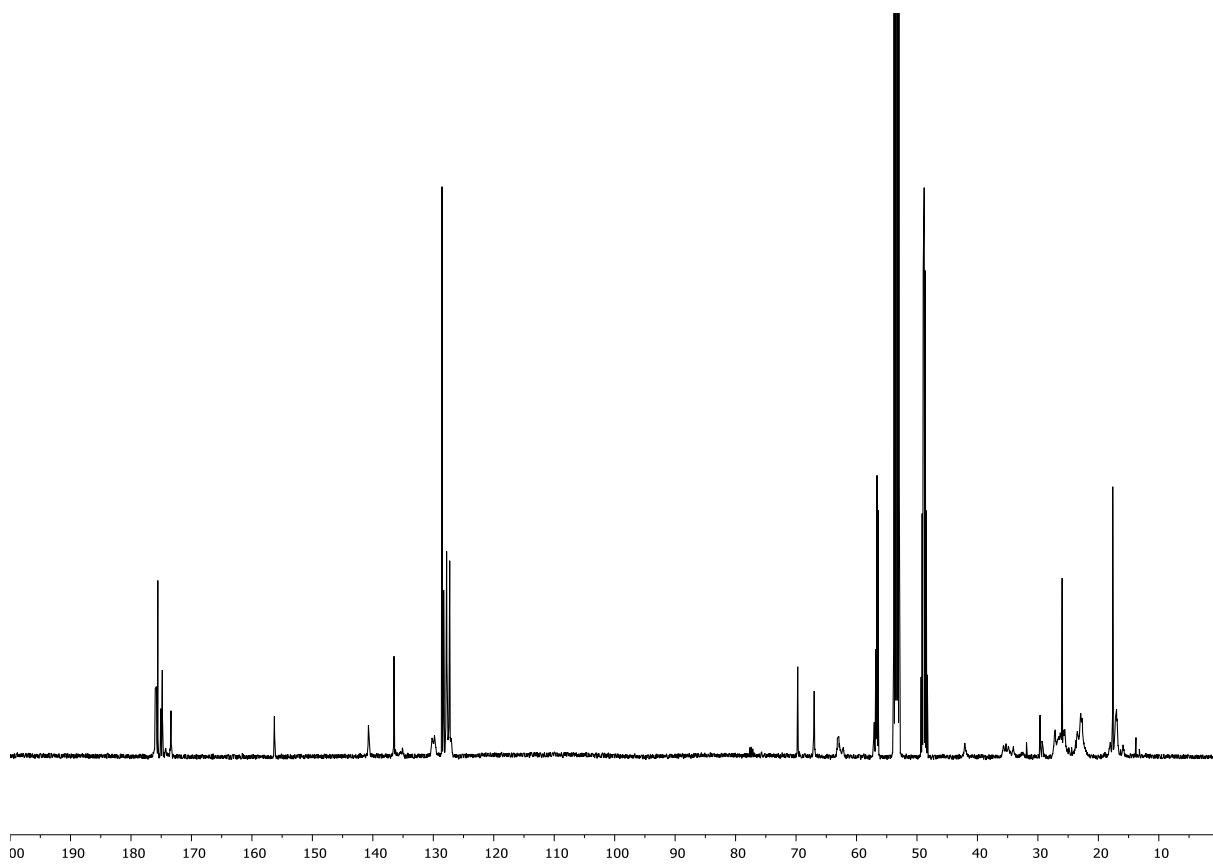





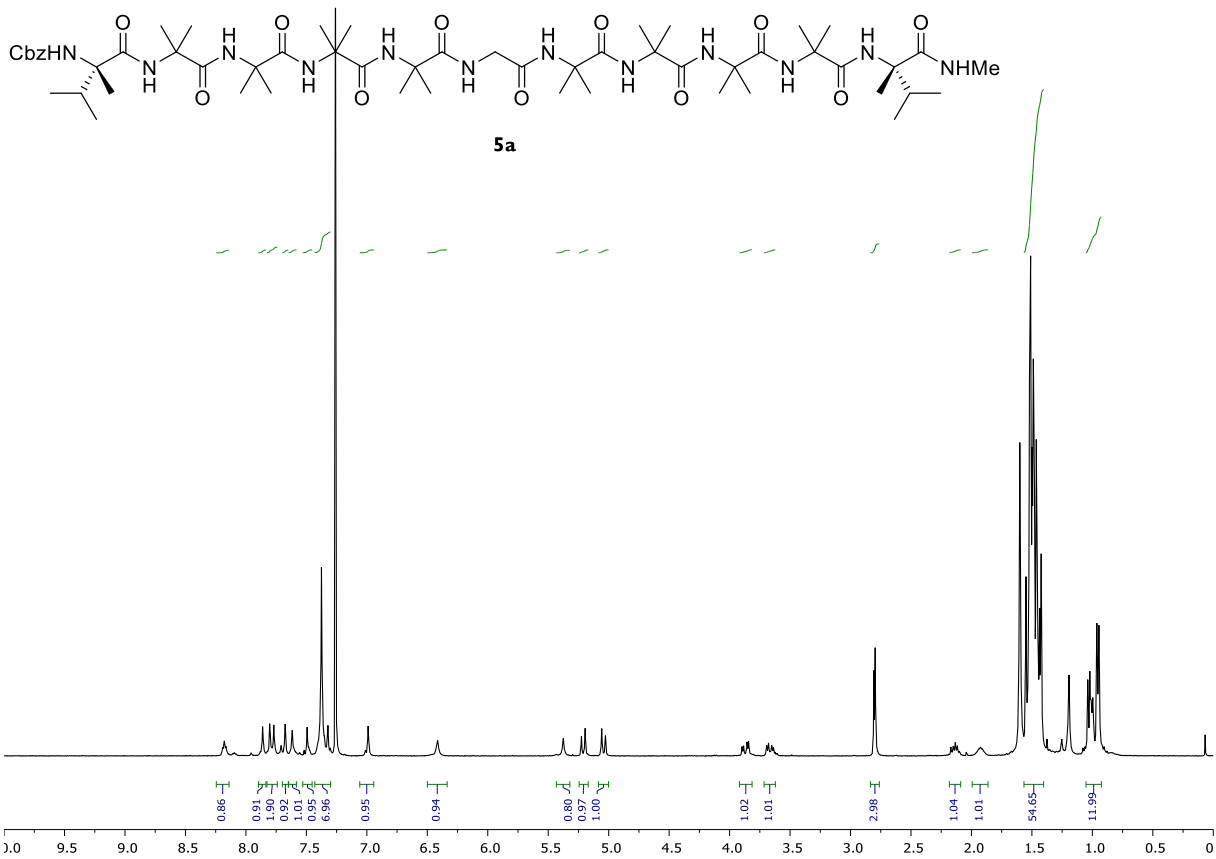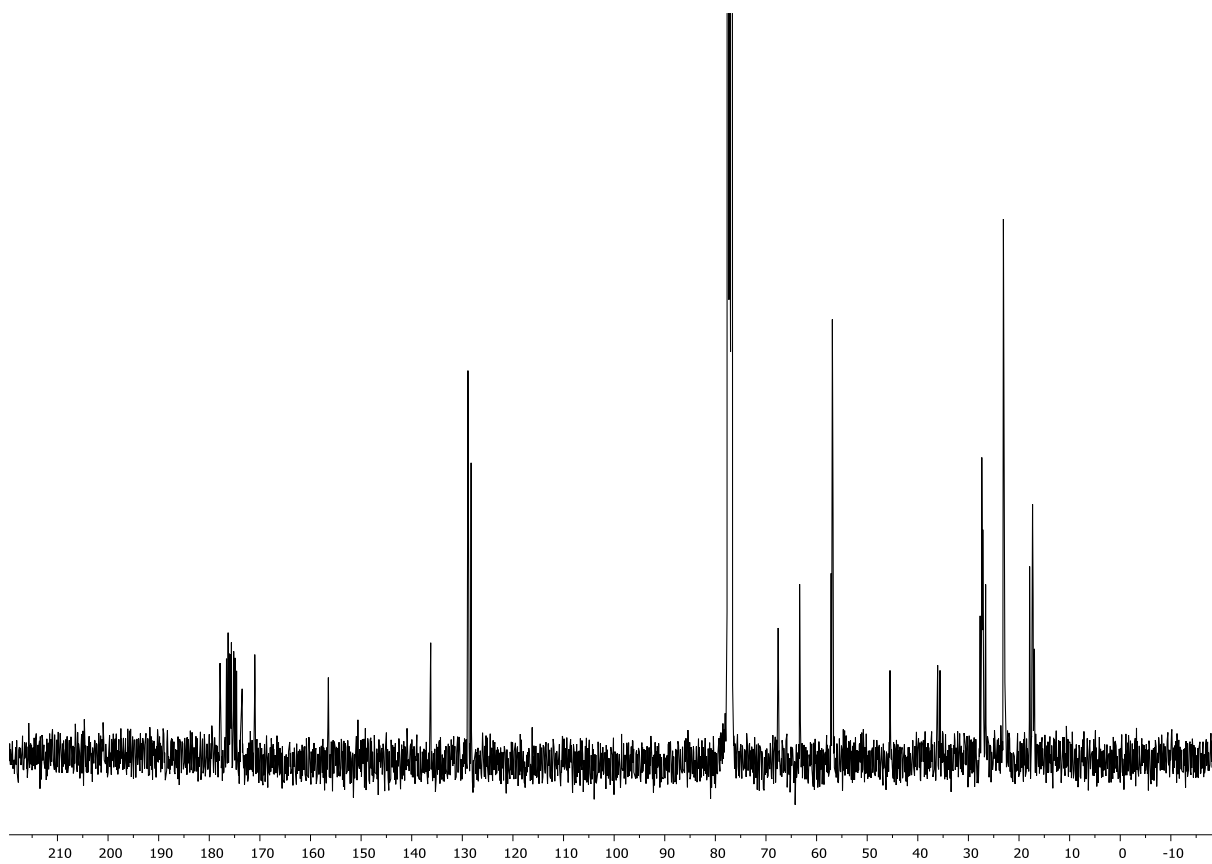





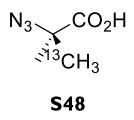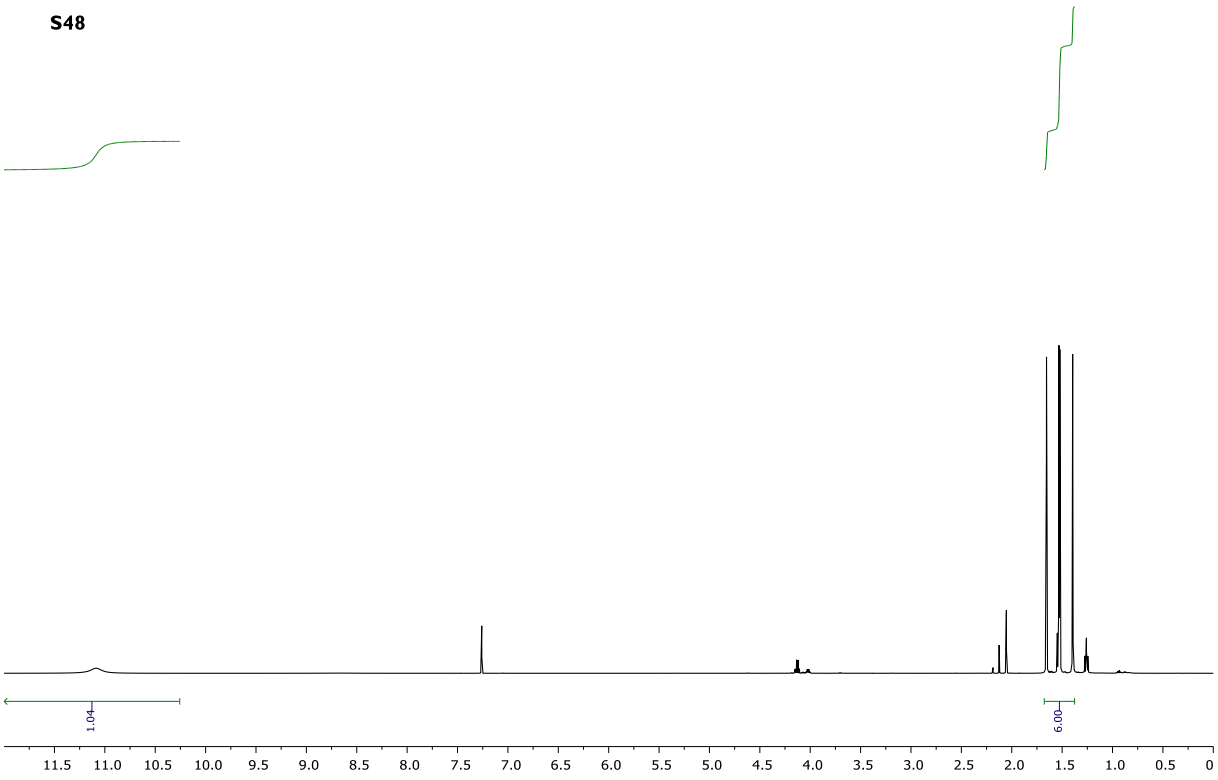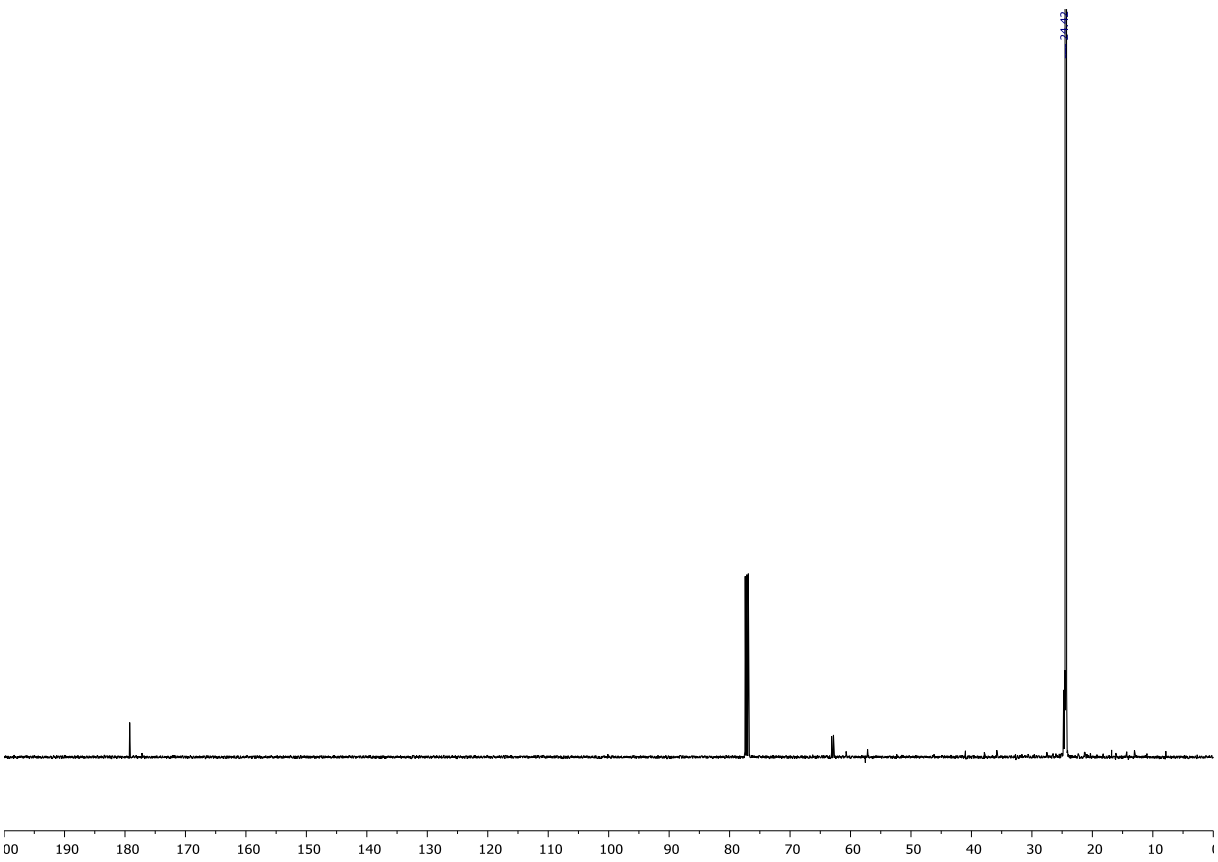



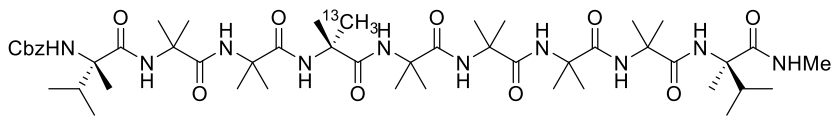

**6a**

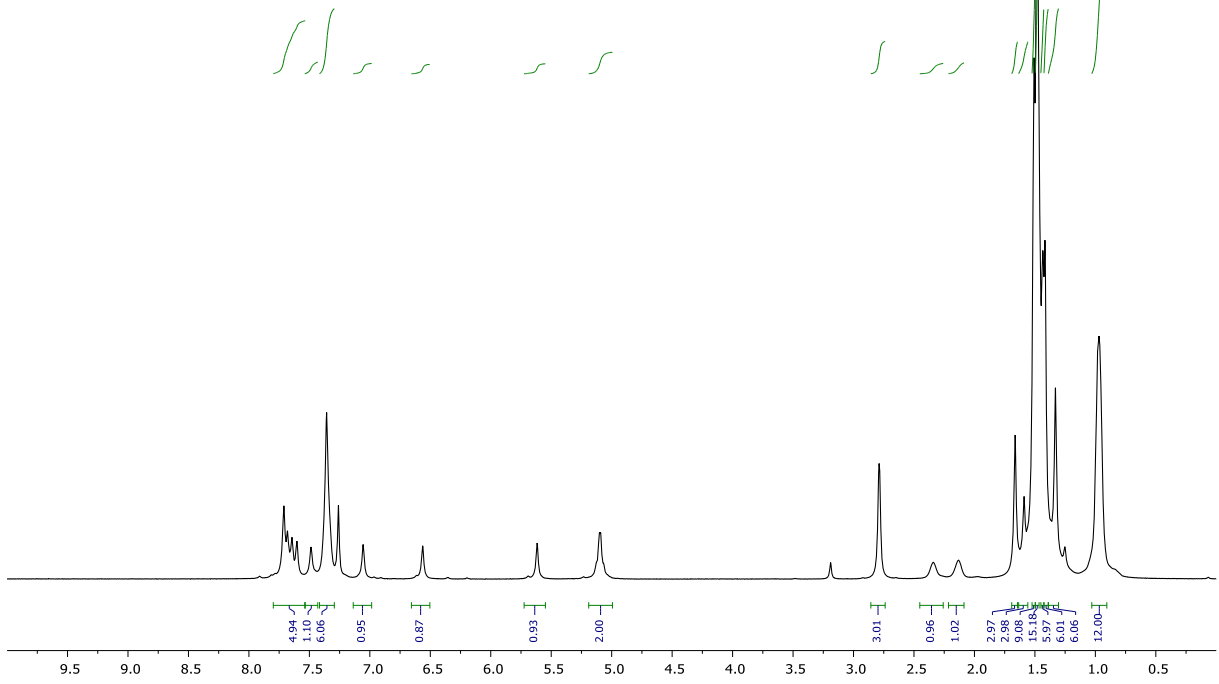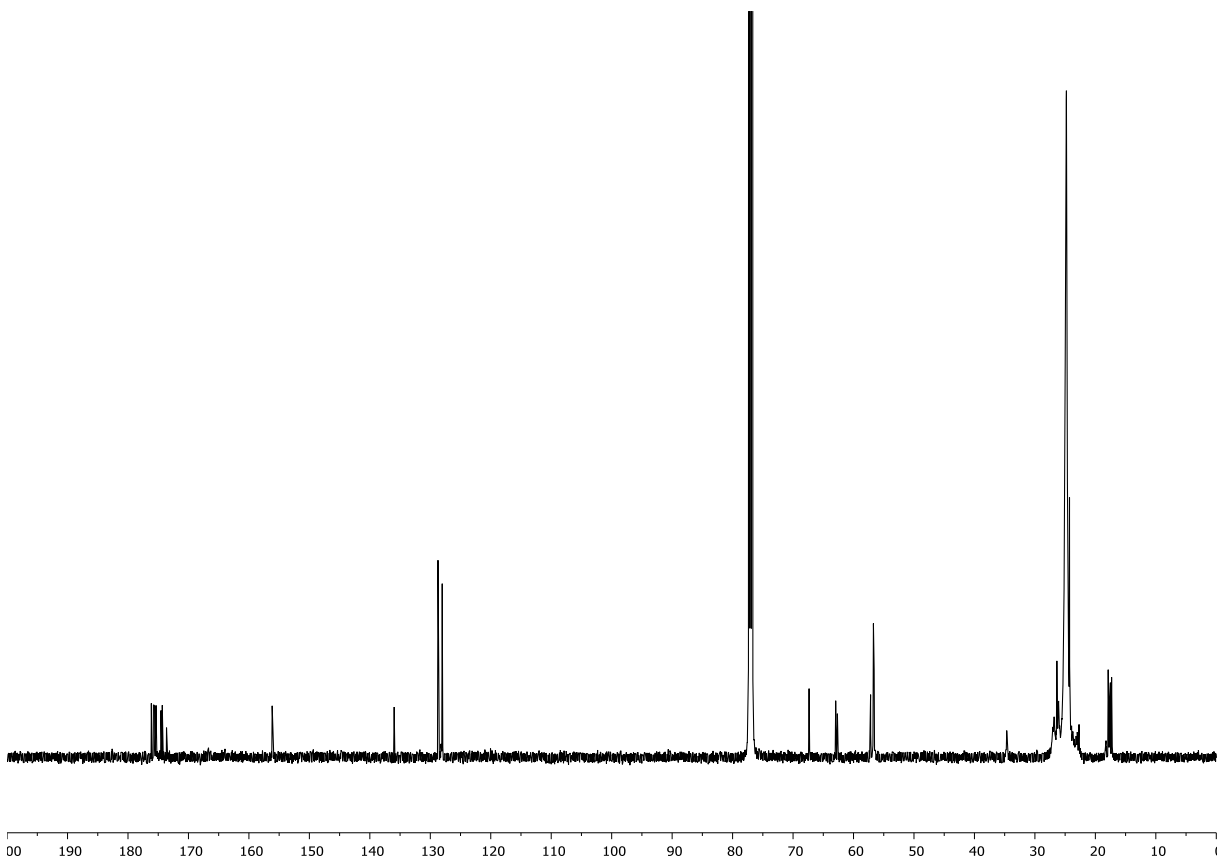



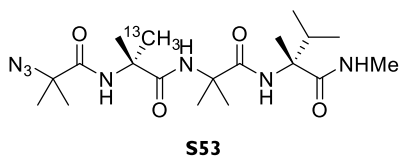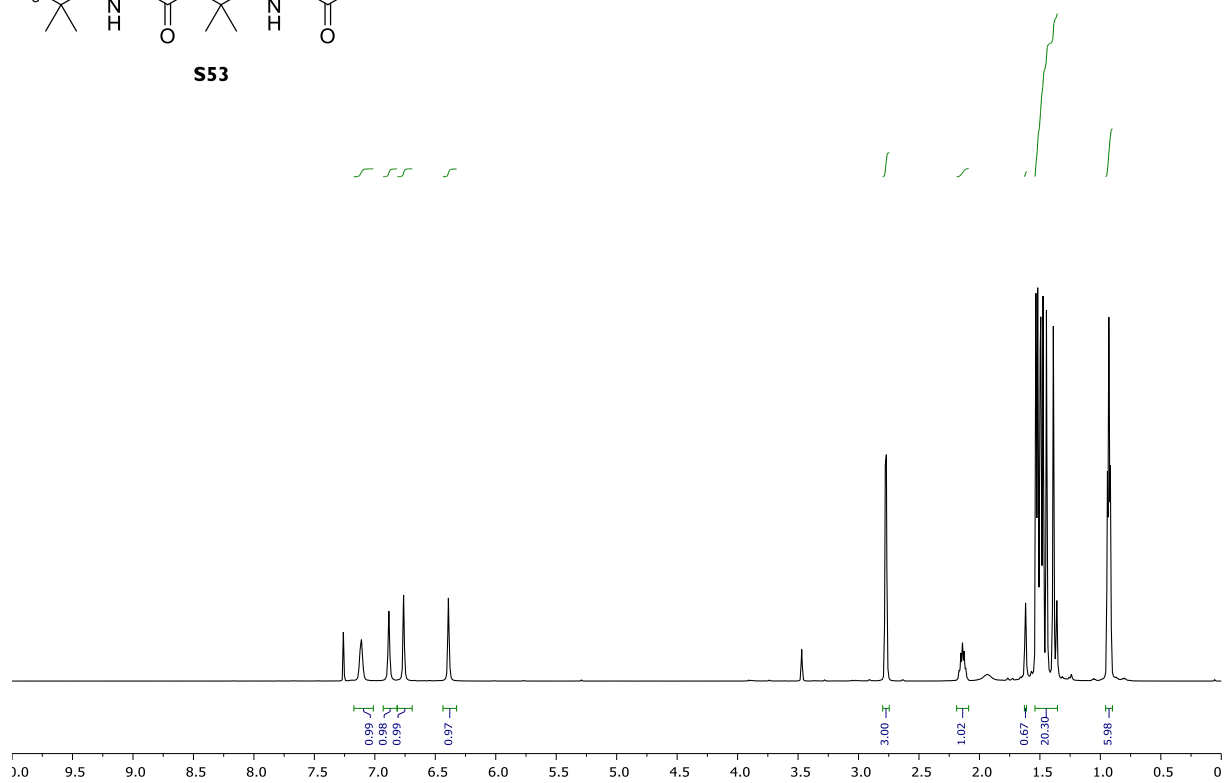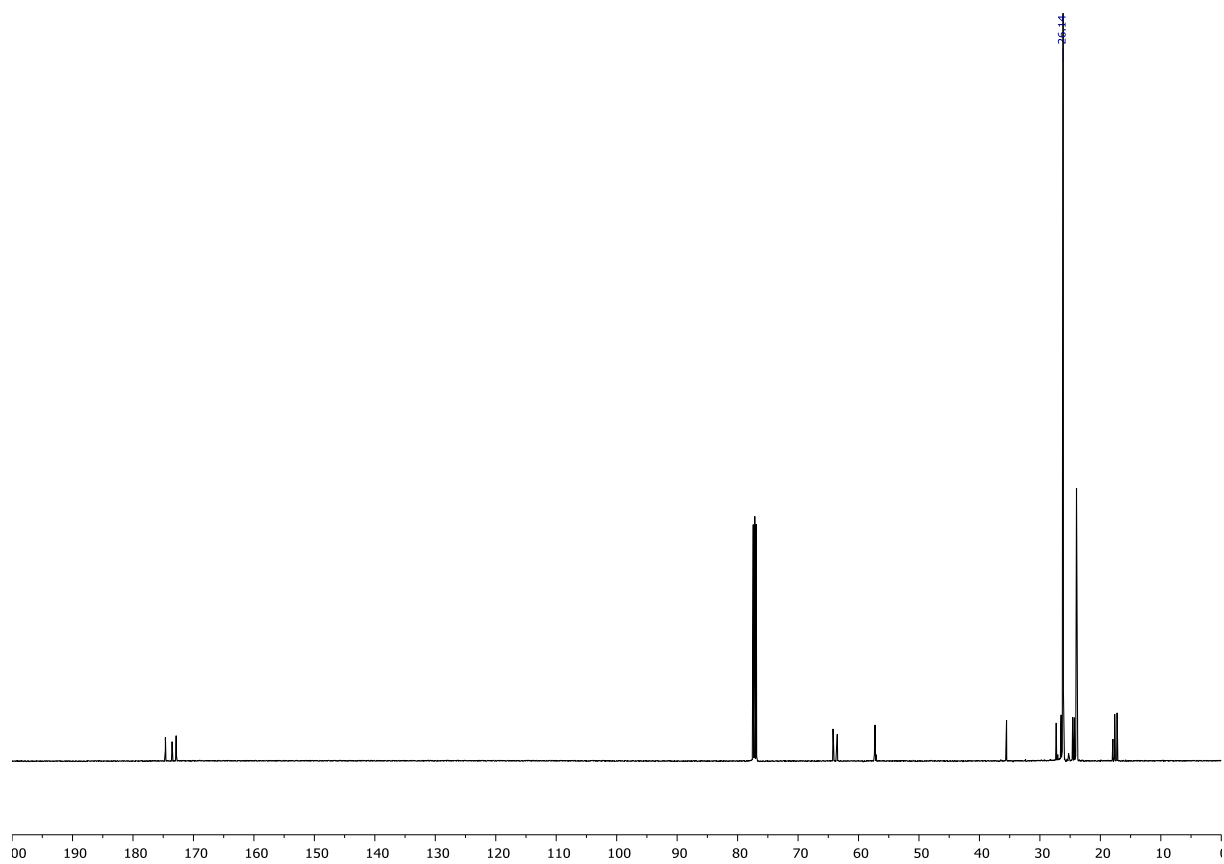







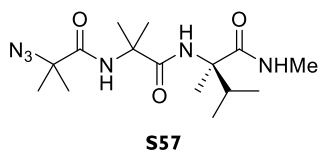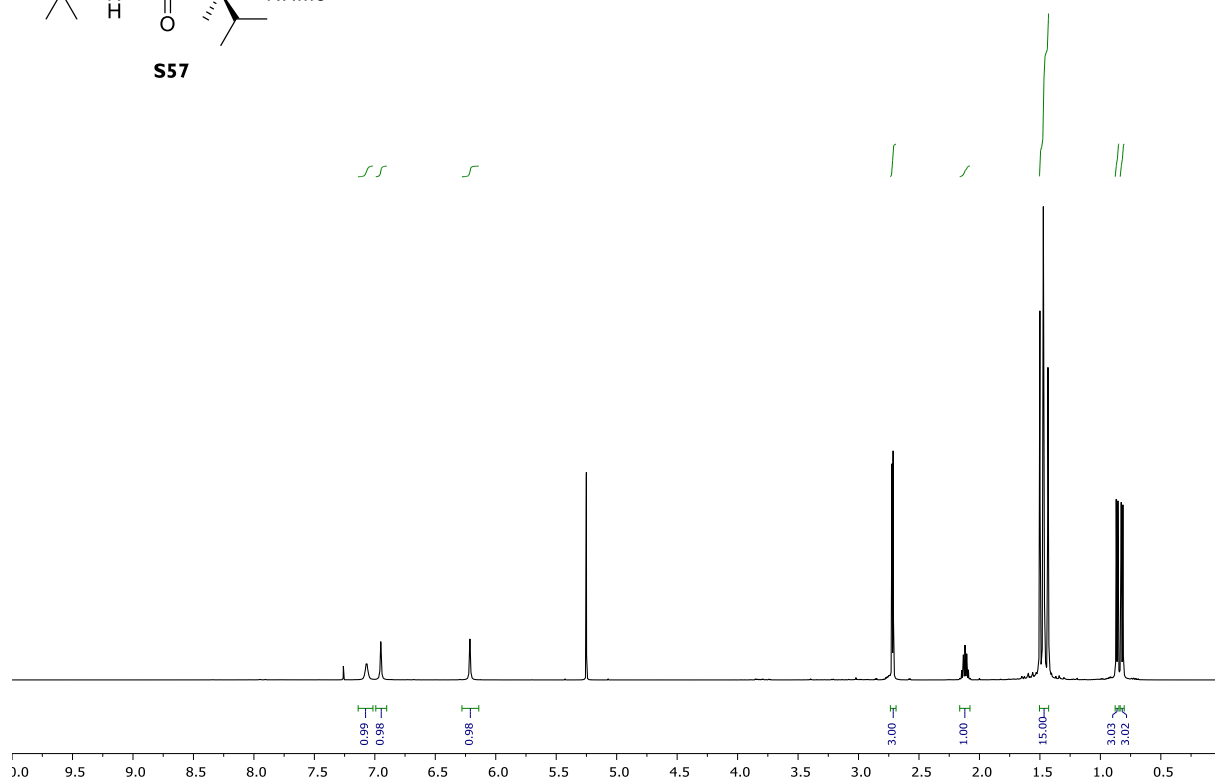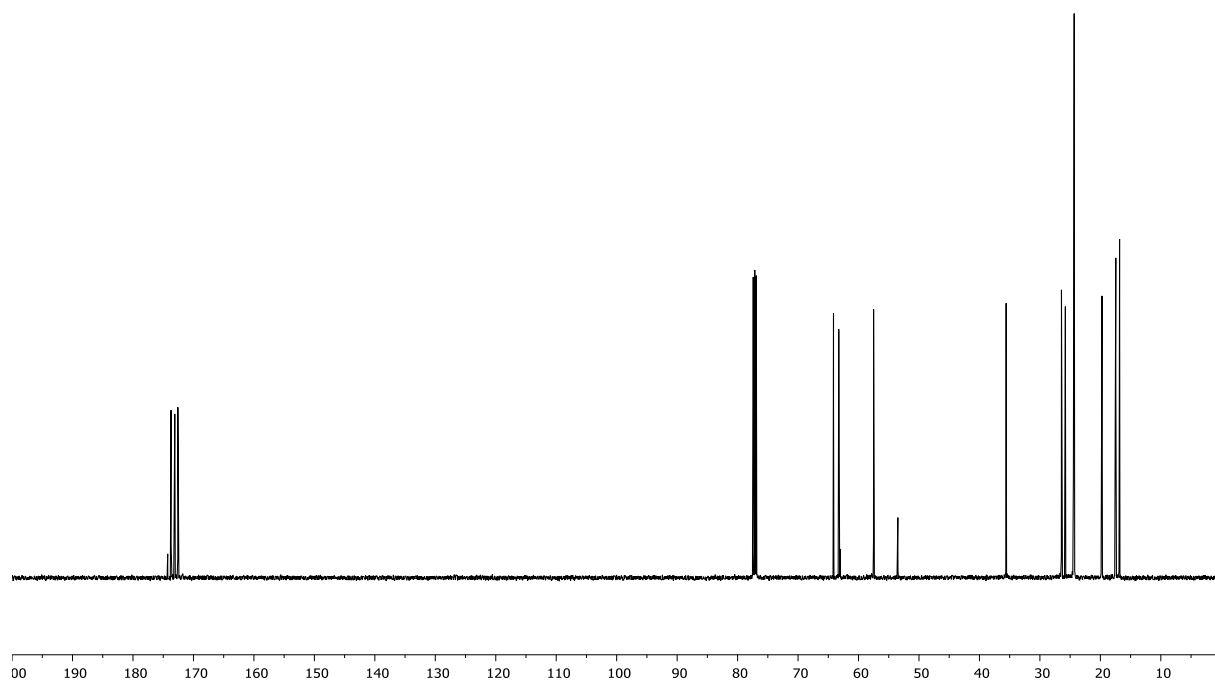

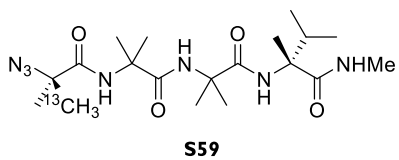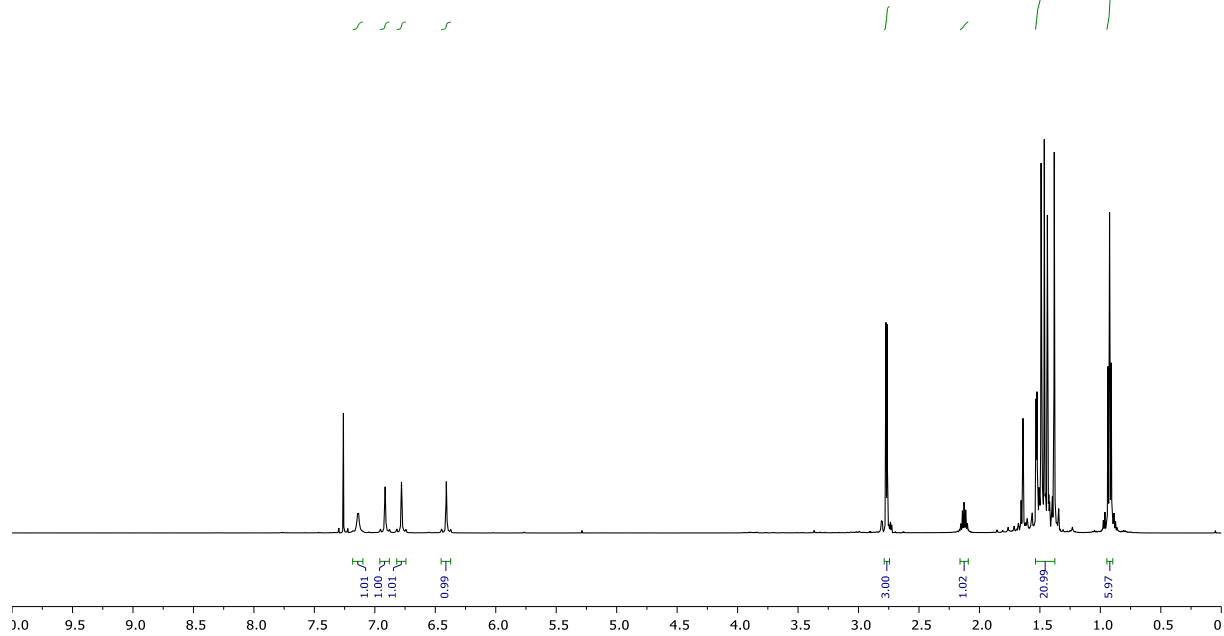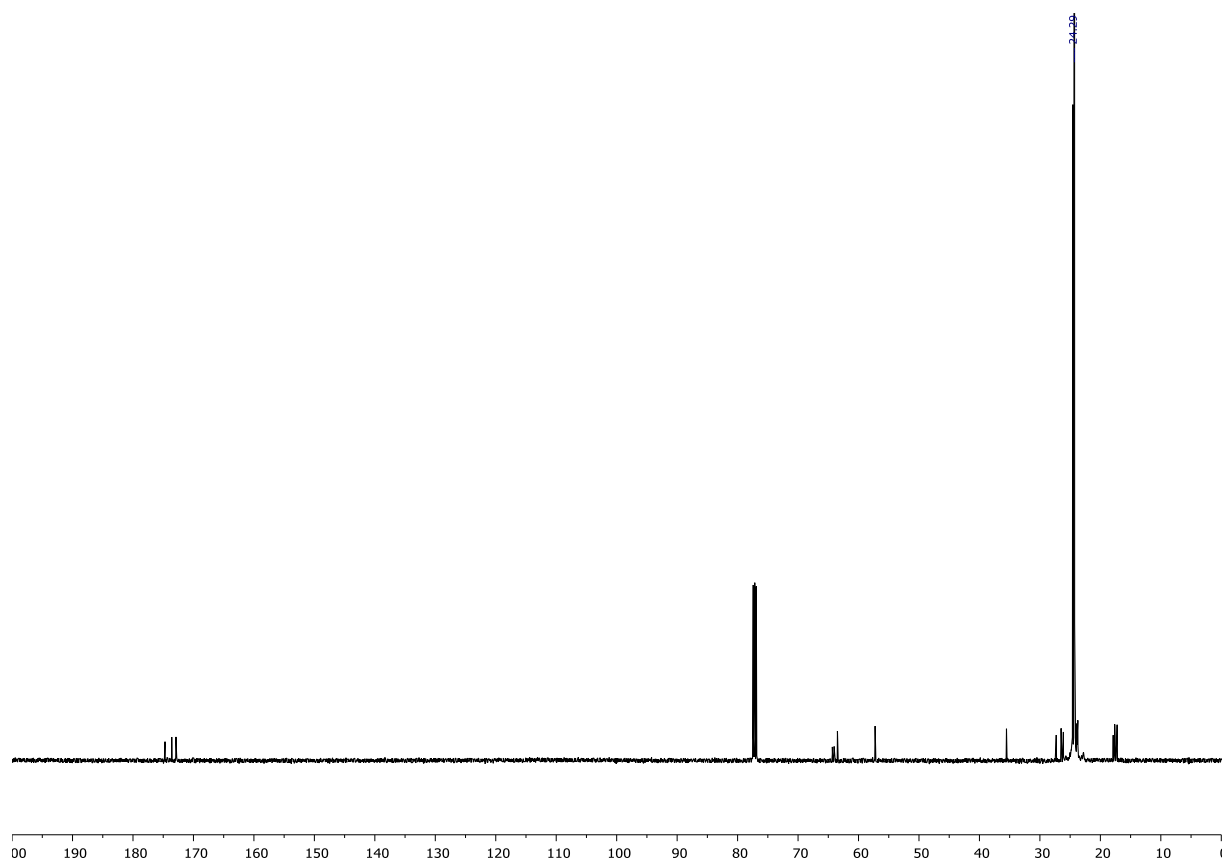



### 3. Computational methods

**REMD Simulations.** Aib, (R)- and (S)- $\alpha$ MeVal amino acids and the Cbz protecting group were designed using MOE<sup>11</sup>, the formers capped with an acetyl (Ac) and a NHMe group at the N- and C-termini, respectively, while the latter capped with the only NHMe group. They were then submitted to a “Low Mode” conformational search by setting MMFF94x as force field, Born solvation model, iteration limit = 40000, MM iteration limit = 2500, and rejection limit = 500. For each molecule, the two conformations showing the lowest energy and, in the case of the three amino acids, with the  $\phi$  and  $\psi$  dihedrals corresponding to the right- and left-handed helical ones ( $\phi = \pm 60^\circ$  and  $\psi = \pm 45^\circ$ ) were chosen for partial charges derivation performed by the R.E.D.IV software<sup>12</sup>. For this step, the selected geometries were optimized at the HF/6-31G(d) theory level and the RESP-AI charges were derived using two different spatial orientations, in order to have an orientation- and conformation-independent charge derivation. Moreover, the amino acids backbone nitrogen, hydrogen, carbonyl carbon and oxygen charges were fixed at the values reported in the AMBER *ff99SBildn- $\phi$*  force field<sup>13</sup> for standard amino acids (e.g. -0.4157, 0.2719, 0.5973 and -0.5679, respectively).

Cbz-(S)- $\alpha$ MeVal<sub>2</sub>-Aib<sub>5</sub>-(S)- $\alpha$ MeVal<sub>2</sub>-NHMe (**1a**) and Cbz-(S)- $\alpha$ MeVal<sub>2</sub>-Aib<sub>5</sub>-(R)- $\alpha$ MeVal<sub>2</sub>-NHMe (**1b**) peptides were built by imposing an extended conformation ( $\phi = \psi = \omega = 180^\circ$ ). REMD simulations in implicit solvent of the two peptides were performed using the AMBER *ff99SBildn- $\phi$*  force field coupled with the implicit solvent model GB-Neck2 (*igb = 8*),<sup>14</sup> combination that proved to give the best results in predicting peptides secondary structures.<sup>15</sup> 16 replica, spanning temperatures between 260.00 K and 690.08 K with a 0.5 probability exchange, were run for 100 ns each, for a total of 1.6  $\mu$ s of simulation for each peptide, using the *pmemd* module of the Amber14 package.<sup>16</sup> The trajectories at 297.31 K were extracted, unless stated otherwise, and analyzed on the 50-100 ns time interval.

For the REMD simulations in explicit methanol, the Cbz-(S)- $\alpha$ MeVal<sub>2</sub>-Aib<sub>5</sub>-(R)- $\alpha$ MeVal<sub>2</sub>-NHMe peptide in the extended conformation was solvated with an octahedral box of 1290 MeOH molecules (closeness = 8.0 Å) and preliminary submitted to minimization and equilibrations cycles. Initially 5000 cycles of hydrogens minimization (1000 cycles of steepest descent and 4000 cycles of conjugated gradient), followed by 5000 cycles of solvent minimization (2000 cycles of steepest descent and 3000 cycles of conjugated gradient) were carried out. Then, the solvent box was equilibrated at 300 K by 1ns of NVT equilibration and 1ns of NPT equilibration using the Langevin thermostat with a frequency collision on 2.0. This step was followed by 5000 cycles (2500 of steepest descent and 2500 of conjugated gradient) of solvent and sidechains minimization and by 5000 cycles (2500 of steepest descent and 2500 of conjugated gradient) of total minimization. The last step consisted in 100 ps of NVT and 100 ps of NPT equilibration of the whole system. The REMD simulation of the equilibrated system was carried out with the AMBER *ff99SBildn- $\phi$*

force field and by performing 40 replica of 120 ns each (4.8  $\mu$ s totally) between 290.00 K and 511.61 with an exchange probability of 0.20. The trajectory at 303.60 K was extracted, the solvent was stripped out and the simulation convergence was checked every 10 ns by assuring that the conformations obtained during the 10 ns time intervals were similar on the base of the Root Mean Square Deviation (RMSD).

Cluster analyses were performed with Amber14<sup>16</sup> *cpptraj* using the average-linkage algorithm and the pairwise mass-weighted RMSD on the C $\alpha$  of residues 7-11, in order to clearly identify where the inversion of the screw helical sense occurs. For the simulations conducted in implicit solvent the 50-100 ns time interval was analyzed by sampling one every four frames and by requesting 5 clusters on the basis of pseudo-F statistics and SSR/SST ratio.<sup>17</sup> As regards the REMD in explicit solvent, since convergence was reached after 50 ns, the last 60 ns were submitted to cluster analysis, one every four frames was sampled and 15 clusters were requested.

H-bond occupancies during the simulations were computed with VMD 1.9.1<sup>18</sup> over the whole trajectories for the simulations in implicit solvent and on the last 60 ns for that in explicit methanol, with a donor-acceptor distance limit of 4.0  $\text{\AA}$  and an angle cutoff of 60°. This very low angle acceptance threshold was chosen in order to be able to identify also the presence of  $\gamma$ -turns, since it has been showed that the hydrogen bond in  $\gamma$ -turns is highly bent<sup>19</sup> and the N-H-O angle can reach values of 110-130°. Only H-bonds with an occupancy greater than 5% were considered. The H-bond analysis between peptide **2** and methanol molecules was performed with Amber14 *cpptraj*, using successively the backbone carbonyl oxygen atoms as acceptor atoms and setting methanol molecules as solvent donor, then the methanol residues were considered as solvent acceptor and the backbone amidic hydrogens were considered as donor atoms. In this case the distance cutoff was set to 4.0  $\text{\AA}$  and the minimum angle accepted was fixed at 150°, as for standard H-bonds.

Potential of Mean Force (PMF) as a function of  $\phi$  and  $\psi$  dihedrals were computed with Amber software coupled with the Weighted Histogram Analysis Method (WHAM)<sup>20</sup> over the whole implicit solvent trajectories and over the last 60 ns for the explicit methanol simulation by setting a histogram limit of  $\pm 180^\circ$ , 100 bins and a tolerance of 0.01. Temperatures between 260.00 K and 317.73 K were considered. A threshold of 6 kcal/mol has been fixed for the non-accessible conformations.

**Table S1.** H-bond analyses of REMD trajectories of peptides **Ia** and **Ib** (Donor, N-H; Acceptor, C=O).

| peptide <b>Ia</b>    |                      |           | peptide <b>Ib</b>    |                      |           |
|----------------------|----------------------|-----------|----------------------|----------------------|-----------|
| donor                | acceptor             | occupancy | Donor                | acceptor             | occupancy |
| Aib4                 | (S)- $\alpha$ MeVal1 | 90.24%    | Aib4                 | (S)- $\alpha$ MeVal1 | 88.43%    |
| Aib5                 | (S)- $\alpha$ MeVal2 | 93.05%    | Aib5                 | (S)- $\alpha$ MeVal2 | 86.74%    |
| Aib6                 | Aib3                 | 92.92%    | Aib6                 | Aib3                 | 86.11%    |
| Aib7                 | Aib4                 | 92.74%    | Aib7                 | Aib4                 | 86.95%    |
| Aib7                 | Aib5                 | 6.52%     | Aib7                 | Aib5                 | 8.42%     |
| (S)- $\alpha$ MeVal8 | Aib5                 | 73.44%    | (R)- $\alpha$ MeVal8 | Aib5                 | 56.07%    |
| (S)- $\alpha$ MeVal8 | Aib6                 | 7.46%     | (R)- $\alpha$ MeVal8 | Aib6                 | 10.50%    |
| (S)- $\alpha$ MeVal9 | Aib6                 | 77.69%    | (R)- $\alpha$ MeVal9 | Aib6                 | 59.00%    |
| (S)- $\alpha$ MeVal9 | Aib7                 | 6.91%     | (R)- $\alpha$ MeVal9 | Aib7                 | 8.40%     |

**Table S2.** H-bond analysis of explicit solvent REMD trajectory of peptide **Ib**.

| donor                | acceptor             | occ%  | Donor                | Acceptor | Frac% <sup>§</sup> | Donor | Acceptor             | Frac% <sup>§</sup> |
|----------------------|----------------------|-------|----------------------|----------|--------------------|-------|----------------------|--------------------|
| Aib4                 | (S)- $\alpha$ MeVal1 | 82.83 | (S)- $\alpha$ MeVal1 | MeOH     | 70.4               | MeOH  | (R)- $\alpha$ MeVal9 | 71.55              |
| Aib3                 | (S)- $\alpha$ MeVal1 | 7.38  | (S)- $\alpha$ MeVal2 | MeOH     | 41.5               | MeOH  | (R)- $\alpha$ MeVal8 | 61.03              |
| Aib5                 | (S)- $\alpha$ MeVal2 | 81.43 | Aib6                 | MeOH     | 11.9               | MeOH  | Aib7                 | 41.68              |
| Aib4                 | (S)- $\alpha$ MeVal2 | 5.9   | Aib5                 | MeOH     | 11.4               | MeOH  | Aib3                 | 34.52              |
| Aib6                 | Aib3                 | 79.53 | Aib7                 | MeOH     | 9.85               | MeOH  | Aib4                 | 31.52              |
| Aib5                 | Aib3                 | 6.06  | Aib4                 | MeOH     | 7.09               | MeOH  | Aib5                 | 29.84              |
| Aib7                 | Aib4                 | 81.81 | (R)- $\alpha$ MeVal8 | MeOH     | 3.79               | MeOH  | (S)- $\alpha$ MeVal2 | 26.68              |
| Aib6                 | Aib4                 | 5.55  | Aib3                 | MeOH     | 3.6                | MeOH  | (S)- $\alpha$ MeVal1 | 24.73              |
| (R)- $\alpha$ MeVal8 | Aib5                 | 73.43 | (R)- $\alpha$ MeVal9 | MeOH     | 0.83               | MeOH  | Aib6                 | 22.45              |
| Aib7                 | Aib5                 | 8.93  |                      |          |                    |       |                      |                    |
| (R)- $\alpha$ MeVal9 | Aib6                 | 75.51 |                      |          |                    |       |                      |                    |
| (R)- $\alpha$ MeVal8 | Aib6                 | 14.83 |                      |          |                    |       |                      |                    |
| (R)- $\alpha$ MeVal9 | Aib7                 | 11.41 |                      |          |                    |       |                      |                    |

<sup>§</sup> The frac% doesn't represent a real occupancy, since for any given frame more than one solvent molecule can bind to the same place.



**Table S3.** Variation helical excess with position in the chain for the achiral Aib5 domain of **1a** calculated from the Boltzmann distributions resulting from PMF profiles in implicit solvent.

| Aib res | E <sub>rel</sub> (kcal/mol) |      | B-factor <sup>a</sup> |      | h.e.% |
|---------|-----------------------------|------|-----------------------|------|-------|
|         | M                           | P    | M                     | P    |       |
| 1       | 1.66                        | 0.00 | 0.06                  | 1.00 | 88.38 |
| 2       | 1.32                        | 0.00 | 0.11                  | 1.00 | 80.18 |
| 3       | 1.30                        | 0.00 | 0.11                  | 1.00 | 80.18 |
| 4       | 1.08                        | 0.00 | 0.16                  | 1.00 | 72.41 |
| 5       | 1.51                        | 0.00 | 0.08                  | 1.00 | 85.19 |

<sup>a</sup>Calculated as  $\exp\left(\frac{-E_{rel}}{RT}\right)$  with R being the gas constant and T the temperature (300K).

**Table S4.** Variation helical excess with position in the chain for the achiral Aib5 domain of **1b** calculated from the Boltzmann distributions resulting from PMF profiles in implicit solvent.

| Aib res | E <sub>rel</sub> (kcal/mol) <sup>a</sup> |      | B-factor <sup>b</sup> |      | h.e.%  |
|---------|------------------------------------------|------|-----------------------|------|--------|
|         | M                                        | P    | M                     | P    |        |
| 1       | 1.53                                     | 0.00 | 0.08                  | 1.00 | 85.19  |
| 2       | 0.98                                     | 0.00 | 0.19                  | 1.00 | 68.07  |
| 3       | 0.62                                     | 0.00 | 0.35                  | 1.00 | 48.15  |
| 4       | 0.39                                     | 0.00 | 0.52                  | 1.00 | 31.58  |
| 5       | -0.57                                    | 0.00 | 2.60                  | 1.00 | -44.44 |

<sup>a</sup>Calculated as  $\exp\left(\frac{-E_{rel}}{RT}\right)$  with R being the gas constant and T the temperature (300K).

**Table S5.** Variation of helical excess with position in the chain for the achiral Aib5 domain of **1b** calculated from the Boltzmann distributions resulting from PMF profiles in explicit methanol.

| Aib res | E <sub>rel</sub> (kcal/mol) <sup>a</sup> |      | B-factor <sup>b</sup> |      | h.e.%  |
|---------|------------------------------------------|------|-----------------------|------|--------|
|         | M                                        | P    | M                     | P    |        |
| 1       | 0.75                                     | 0.00 | 0.28                  | 1.00 | 56.25  |
| 2       | 0.32                                     | 0.00 | 0.58                  | 1.00 | 26.58  |
| 3       | -0.10                                    | 0.00 | 1.18                  | 1.00 | -8.23  |
| 4       | -0.43                                    | 0.00 | 2.06                  | 1.00 | -34.64 |
| 5       | -0.77                                    | 0.00 | 3.64                  | 1.00 | -56.90 |

Calculated as  $\exp\left(\frac{-E_{rel}}{RT}\right)$  with R being the gas constant and T the temperature (300K).

## 4. Raman spectroscopy

### Experimental procedure

Raman spectra were recorded on a ChiralRaman spectrometer (BioTools Inc., USA). Solutions of compounds **1a**, **1b**, **5a**, **5b** and  $N_3Aib_2O^tBu$ ,<sup>5</sup> were prepared in  $CHCl_3$  (100  $\mu$ L, 60 mg/mL). All measurements were performed at 25 °C. Spectral deconvolution was performed using Origin Pro9.

### Raman spectra of **1a** and **1b**

Foldamers **1a** and **1b** both present one peak, centred at about 1664  $cm^{-1}$ , in the amide I region after deconvolution. The position of this peak is consistent with foldamer in a  $3_{10}$  helical conformation.

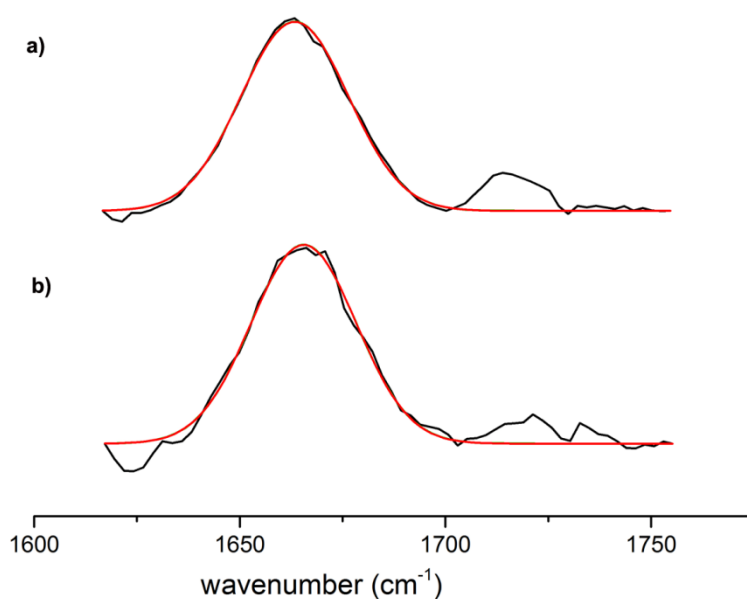

**Figure S1:** Amide I region of foldamers a) **1a** and b) **1b** in  $CHCl_3$ . The black trace shows the experimental data, the green trace (obscured) shows the peak deconvolution and the red trace shows the calculated cumulative peak.

### Raman spectra of **5a**, **5b** and $N_3Aib_2O^tBu$

The deconvolution of the amide I region for the peptides **5a** and **5b** showed the peptides are principally  $3_{10}$ -helical. Deconvolution shows that 95% of the population is given by the peak at 1661  $cm^{-1}$  and 5% by the peak at 1682  $cm^{-1}$  for **5a** and 91% at 1661  $cm^{-1}$  and 9% at 1682  $cm^{-1}$  for **5b**.

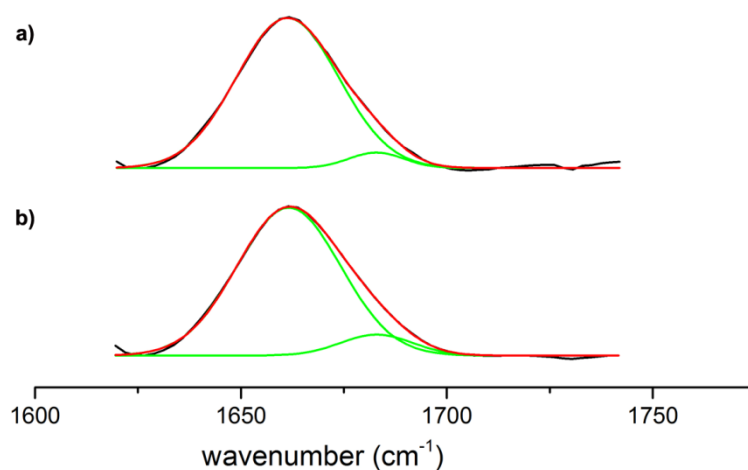

**Figure S2:** Amide I region of foldamers a) **5a** and b) **5b** in  $\text{CHCl}_3$ . The black trace shows the experimental data, the green trace shows the peak deconvolution and the red trace shows the calculated cumulative peak.

The Raman spectrum of the dimer  $\text{N}_3\text{Aib}_2\text{O}^t\text{Bu}$ , which is too short to fold into a helix, shows only a single amide I band at  $1681\text{ cm}^{-1}$  after deconvolution, suggesting that the additional peak at  $1682\text{ cm}^{-1}$  in the Raman spectra of **5a** and **5b** arises from unfolded conformations.

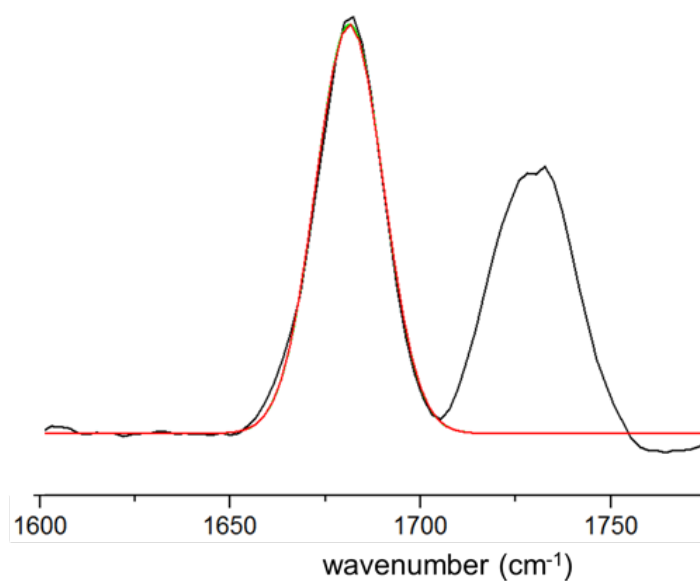

**Figure S3:** Amide I region of dimer  $\text{N}_3\text{Aib}_2\text{O}^t\text{Bu}$  in  $\text{CHCl}_3$ . The black trace shows the experimental data, the green trace (obscured) shows the peak deconvolution and the red trace shows the calculated cumulative peak.

## 5. X-ray crystallography

X-ray crystal structure data for **1a** and **1b** have been deposited at the CCDC with the deposition numbers CCDC 1518807 and CCDC 1518806 respectively.

## 6. References

- 1 T. S. Cooper, P. Laurent, C. J. Moody and A. K. Takle, *Org. Biomol. Chem.*, 2004, **2**, 265–76.
- 2 F. Formaggio, M. Bonchio, M. Crisma, C. Peggion, S. Mezzato, A. Polese, A. Barazza, S. Antonello, F. Maran, Q. B. Broxterman, B. Kaptein, J. Kamphuis, R. M. Vitale, M. Saviano, E. Benedetti and C. Toniolo, *Chem. - A Eur. J.*, 2002, **8**, 84–93.
- 3 M. Meldal\*, M. A. Juliano and A. M. Jansson, *Tetrahedron Lett.*, 1997, **38**, 2531–2534.
- 4 L. Byrne, J. Solà, T. Boddaert, T. Marcelli, R. W. Adams, G. A. Morris and J. Clayden, *Angew. Chemie Int. Ed.*, 2014, **53**, 151–155.
- 5 J. Clayden, A. Castellanos, J. Solà and G. A. Morris, *Angew. Chemie Int. Ed.*, 2009, **48**, 5962–5965.
- 6 J.-P. Mazaleyrat, A. Gaucher, J. Šavrdá and M. Wakselman, *Tetrahedron: Asymmetry*, 1997, **8**, 619–631.
- 7 J. Solà, G. A. Morris and J. Clayden, *J. Am. Chem. Soc.*, 2011, **133**, 3712–5.
- 8 S. J. Pike, J. Raftery, S. J. Webb and J. Clayden, *Org. Biomol. Chem.*, 2014, **12**, 4124–31.
- 9 S. P. Fletcher, J. Solà, D. Holt, R. A. Brown and J. Clayden, *Beilstein J. Org. Chem.*, 2011, **7**, 1304–9.
- 10 H. Kim, J. K. Cho, S. Aimoto and Y.-S. Lee, *Org. Lett.*, 2006, **8**, 1149–51.
- 11 Chemical Computing Group Inc., Montreal, 2013.
- 12 F.-Y. Dupradeau, A. Pigache, T. Zaffran, C. Savineau, R. Lelong, N. Grivel, D. Lelong, W. Rosanski and P. Cieplak, *Phys. Chem. Chem. Phys.*, 2010, **12**, 7821–7839.
- 13 P. S. Nerenberg and T. Head-gordon, *J. Chem. Theory Comput.*, 2011, **7**, 1220–1230.
- 14 H. Nguyen, D. R. Roe and C. Simmerling, *J. Chem. Theory Comput.*, 2013, **9**, 2020–2034.
- 15 I. Maffucci and A. Contini, *J. Chem. Theory Comput.*, 2016, **12**, 714–727.
- 16 D. A. Case, V. Babin, J. T. Berryman, R. M. Betz, Q. Cai, D. S. Cerutti, T. E. Cheatham, III, T. A. Darden, R. E. Duke, H. Gohlke, A. W. Goetz, S. Gusarov, N. Homeyer, P. Janowski, J. Kaus, I. Kolossváry, A. Kovalenko, T. S. Lee, S. LeGrand, T. Luchko, R. Luo, B. X. Wu, P. A. Kollman, *Univ. California, San Fr.*, 2014.
- 17 T. Calinski and J. Harabasz, *Commun. Stat.*, 1974, **22**, 2577–2637.
- 18 W. Humphrey, A. Dalke and K. Schulten, *J. Mol. Graph.*, 1996, **14**, 33–38.
- 19 M. Crisma, M. De Zotti, A. Moretto, C. Peggion, B. Drouillat, K. Wright, F. Couty, C. Toniolo and F. Formaggio, *New J. Chem.*, 2015, **39**, 3208–3216.
- 20 A. Grossfield, [http //membrane.urmc.rochester.edu/content/wham](http://membrane.urmc.rochester.edu/content/wham), 2015.
